# Supplementary material
Source: publisher figshare collection journal article supplement (https://acs.figshare.com/ndownloader/files/6530130)
Supplement: Supplementary file 1 [file 6530130]

**Access to phosphorylindenopyrazole scaffold via a metal-free domino  
reaction of diazoalkylphosphonates with 3-bromophthalides**

**Atul Kumar Chaturvedi,<sup>a,b</sup> Ruchir Kant,<sup>c</sup> Namrata Rastogi<sup>\*,a,b</sup>**

<sup>a</sup>Medicinal & Process Chemistry Division and <sup>c</sup>Molecular and Structural Biology Division, CSIR-Central Drug Research Institute, B.S. 10/1, Sector 10, Jankipuram extension, Sitapur Road, Lucknow 226031, India

<sup>b</sup>Academy of Scientific and Innovative Research, New Delhi 110001, India

\* Corresponding author. e-mail: namrata.rastogi@cdri.res.in

**Table of Contents**

| Entry | Description                                          | Page No. |
|-------|------------------------------------------------------|----------|
| 1.    | Figure 1: <sup>1</sup> H NMR spectrum of <b>3a</b>   | 3        |
| 2.    | Figure 2: <sup>13</sup> C NMR spectrum of <b>3a</b>  | 3        |
| 3.    | Figure 3: <sup>31</sup> P NMR spectrum of <b>3a</b>  | 4        |
| 4.    | Figure 4: <sup>1</sup> H NMR spectrum of <b>3b</b>   | 4        |
| 5.    | Figure 5: <sup>13</sup> C NMR spectrum of <b>3b</b>  | 5        |
| 6.    | Figure 6: <sup>31</sup> P NMR spectrum of <b>3b</b>  | 5        |
| 7.    | Figure 7: <sup>1</sup> H NMR spectrum of <b>3c</b>   | 6        |
| 8.    | Figure 8: <sup>13</sup> C NMR spectrum of <b>3c</b>  | 6        |
| 9.    | Figure 9: <sup>31</sup> P NMR spectrum of <b>3c</b>  | 7        |
| 10.   | Figure 10: <sup>1</sup> H NMR spectrum of <b>3d</b>  | 7        |
| 11.   | Figure 11: <sup>13</sup> C NMR spectrum of <b>3d</b> | 8        |
| 12.   | Figure 12: <sup>31</sup> P NMR spectrum of <b>3d</b> | 8        |
| 13.   | Figure 13: <sup>1</sup> H NMR spectrum of <b>3e</b>  | 9        |
| 14.   | Figure 14: <sup>13</sup> C NMR spectrum of <b>3e</b> | 9        |
| 15.   | Figure 15: <sup>31</sup> P NMR spectrum of <b>3e</b> | 10       |
| 16.   | Figure 16: <sup>1</sup> H NMR spectrum of <b>3f</b>  | 10       |
| 17.   | Figure 17: <sup>13</sup> C NMR spectrum of <b>3f</b> | 11       |
| 18.   | Figure 18: <sup>31</sup> P NMR spectrum of <b>3f</b> | 11       |
| 19.   | Figure 19: <sup>1</sup> H NMR spectrum of <b>3g</b>  | 12       |
| 20.   | Figure 20: <sup>13</sup> C NMR spectrum of <b>3g</b> | 12       |
| 21.   | Figure 21: <sup>31</sup> P NMR spectrum of <b>3g</b> | 13       |
| 22.   | Figure 22: <sup>1</sup> H NMR spectrum of <b>3h</b>  | 13       |
| 23.   | Figure 23: <sup>13</sup> C NMR spectrum of <b>3h</b> | 14       |
| 24.   | Figure 24: <sup>31</sup> P NMR spectrum of <b>3h</b> | 14       |
| 25.   | Figure 25: <sup>1</sup> H NMR spectrum of <b>3i</b>  | 15       |
| 26.   | Figure 26: <sup>13</sup> C NMR spectrum of <b>3i</b> | 15       |
| 27.   | Figure 27: <sup>31</sup> P NMR spectrum of <b>3i</b> | 16       |
| 28.   | Figure 28: <sup>1</sup> H NMR spectrum of <b>3j</b>  | 16       |
| 29.   | Figure 29: <sup>13</sup> C NMR spectrum of <b>3j</b> | 17       |
| 30.   | Figure 30: <sup>31</sup> P NMR spectrum of <b>3j</b> | 17       |
| 31.   | Figure 31: <sup>1</sup> H NMR spectrum of <b>3k</b>  | 18       |
| 32.   | Figure 32: <sup>13</sup> C NMR spectrum of <b>3k</b> | 18       |
| 33.   | Figure 33: <sup>31</sup> P NMR spectrum of <b>3k</b> | 19       |

|            |                                                      |           |
|------------|------------------------------------------------------|-----------|
| <b>34.</b> | Figure 34: $^1\text{H}$ NMR spectrum of <b>3l</b>    | <b>19</b> |
| <b>35.</b> | Figure 35: $^{13}\text{C}$ NMR spectrum of <b>3l</b> | <b>20</b> |
| <b>36.</b> | Figure 36: $^{31}\text{P}$ NMR spectrum of <b>3l</b> | <b>20</b> |
| <b>37.</b> | Figure 37: $^1\text{H}$ NMR spectrum of <b>3m</b>    | <b>21</b> |
| <b>38.</b> | Figure 38: $^{13}\text{C}$ NMR spectrum of <b>3m</b> | <b>21</b> |
| <b>39.</b> | Figure 39: $^{31}\text{P}$ NMR spectrum of <b>3m</b> | <b>22</b> |
| <b>40.</b> | Figure 40: $^1\text{H}$ NMR spectrum of <b>3n</b>    | <b>22</b> |
| <b>41.</b> | Figure 41: $^{13}\text{C}$ NMR spectrum of <b>3n</b> | <b>23</b> |
| <b>42.</b> | Figure 42: $^{31}\text{P}$ NMR spectrum of <b>3n</b> | <b>23</b> |
| <b>43.</b> | Figure 43: $^1\text{H}$ NMR spectrum of <b>3o</b>    | <b>24</b> |
| <b>44.</b> | Figure 44: $^{13}\text{C}$ NMR spectrum of <b>3o</b> | <b>24</b> |
| <b>45.</b> | Figure 45: $^{31}\text{P}$ NMR spectrum of <b>3o</b> | <b>25</b> |
| <b>46.</b> | Figure 46: $^1\text{H}$ NMR spectrum of <b>3p</b>    | <b>25</b> |
| <b>47.</b> | Figure 47: $^{13}\text{C}$ NMR spectrum of <b>3p</b> | <b>26</b> |
| <b>48.</b> | Figure 48: $^{31}\text{P}$ NMR spectrum of <b>3p</b> | <b>26</b> |
| <b>49.</b> | Figure 49: $^1\text{H}$ NMR spectrum of <b>3q</b>    | <b>27</b> |
| <b>50.</b> | Figure 50: $^{13}\text{C}$ NMR spectrum of <b>3q</b> | <b>27</b> |
| <b>51.</b> | Figure 51: $^{31}\text{P}$ NMR spectrum of <b>3q</b> | <b>28</b> |
| <b>52.</b> | Figure 52: $^1\text{H}$ NMR spectrum of <b>3r</b>    | <b>28</b> |
| <b>53.</b> | Figure 53: $^{13}\text{C}$ NMR spectrum of <b>3r</b> | <b>29</b> |
| <b>54.</b> | Figure 54: $^{31}\text{P}$ NMR spectrum of <b>3r</b> | <b>29</b> |
| <b>55.</b> | Figure 55: $^1\text{H}$ NMR spectrum of <b>3s</b>    | <b>30</b> |
| <b>56.</b> | Figure 56: $^{13}\text{C}$ NMR spectrum of <b>3s</b> | <b>30</b> |
| <b>57.</b> | Figure 57: $^{31}\text{P}$ NMR spectrum of <b>3s</b> | <b>31</b> |
| <b>58.</b> | Figure 58: $^1\text{H}$ NMR spectrum of <b>3t</b>    | <b>31</b> |
| <b>59.</b> | Figure 59: $^{13}\text{C}$ NMR spectrum of <b>3t</b> | <b>32</b> |
| <b>60.</b> | Figure 60: $^{31}\text{P}$ NMR spectrum of <b>3t</b> | <b>32</b> |
| <b>61.</b> | Figure 61: $^1\text{H}$ NMR spectrum of <b>3u</b>    | <b>33</b> |
| <b>62.</b> | Figure 62: $^{13}\text{C}$ NMR spectrum of <b>3u</b> | <b>33</b> |
| <b>63.</b> | Figure 63: $^{31}\text{P}$ NMR spectrum of <b>3u</b> | <b>34</b> |
| <b>64.</b> | Figure 64: $^1\text{H}$ NMR spectrum of <b>5a</b>    | <b>34</b> |
| <b>65.</b> | Figure 65: $^{13}\text{C}$ NMR spectrum of <b>5a</b> | <b>35</b> |
| <b>66.</b> | Figure 66: $^{31}\text{P}$ NMR spectrum of <b>5a</b> | <b>35</b> |
| <b>67.</b> | Figure 67: $^{13}\text{C}$ NMR spectrum of <b>5b</b> | <b>36</b> |
| <b>68.</b> | Figure 68: $^{31}\text{P}$ NMR spectrum of <b>5b</b> | <b>36</b> |
| <b>69.</b> | Figure 69: $^1\text{H}$ NMR spectrum of <b>5b</b>    | <b>37</b> |
| <b>70.</b> | Figure 70: Crystal structure of <b>3a</b>            | <b>38</b> |

NRAT-IV-34

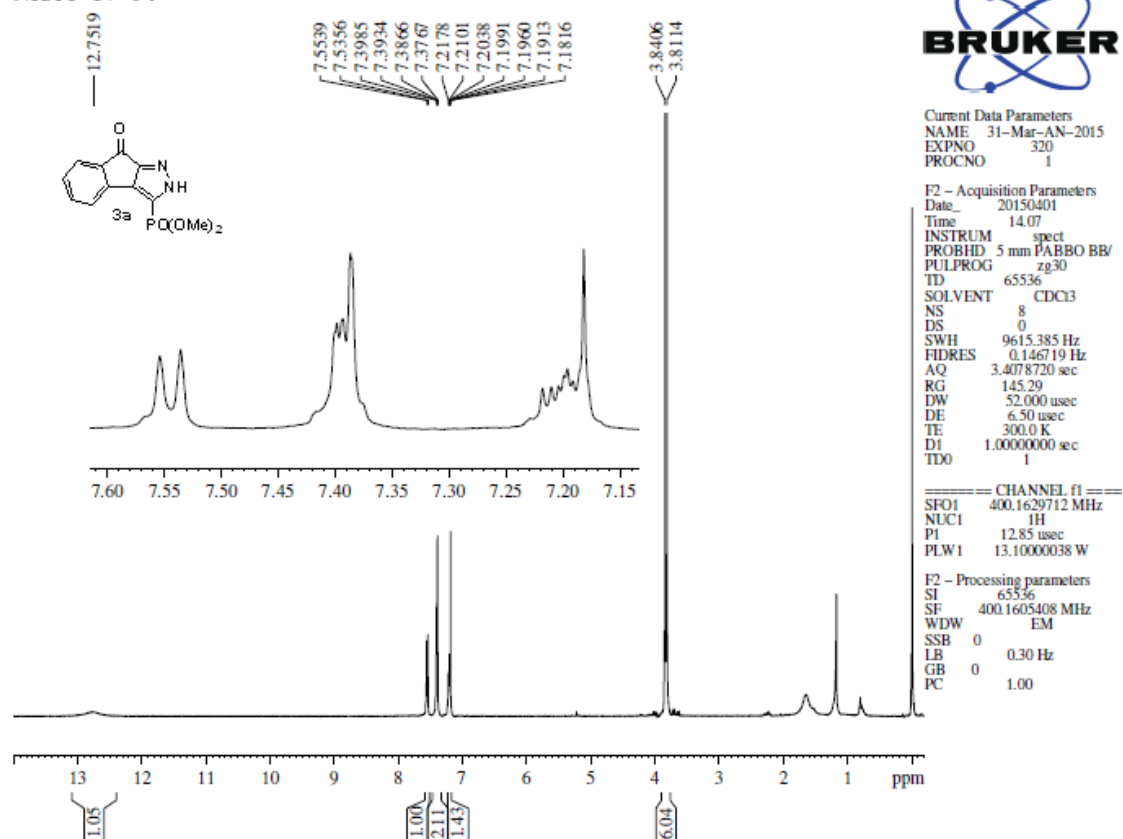Figure 1: <sup>1</sup>H NMR spectrum of 3a

NRAT-IV-34

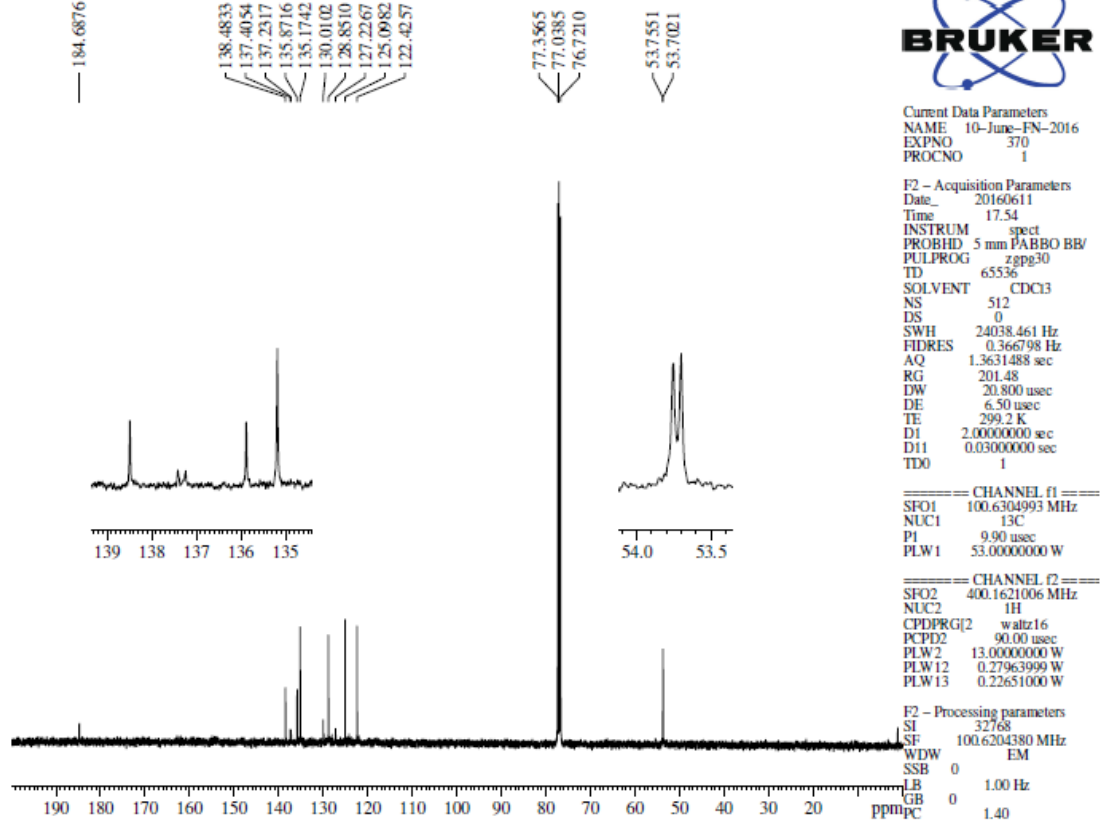Figure 2: <sup>13</sup>C NMR spectrum of 3a

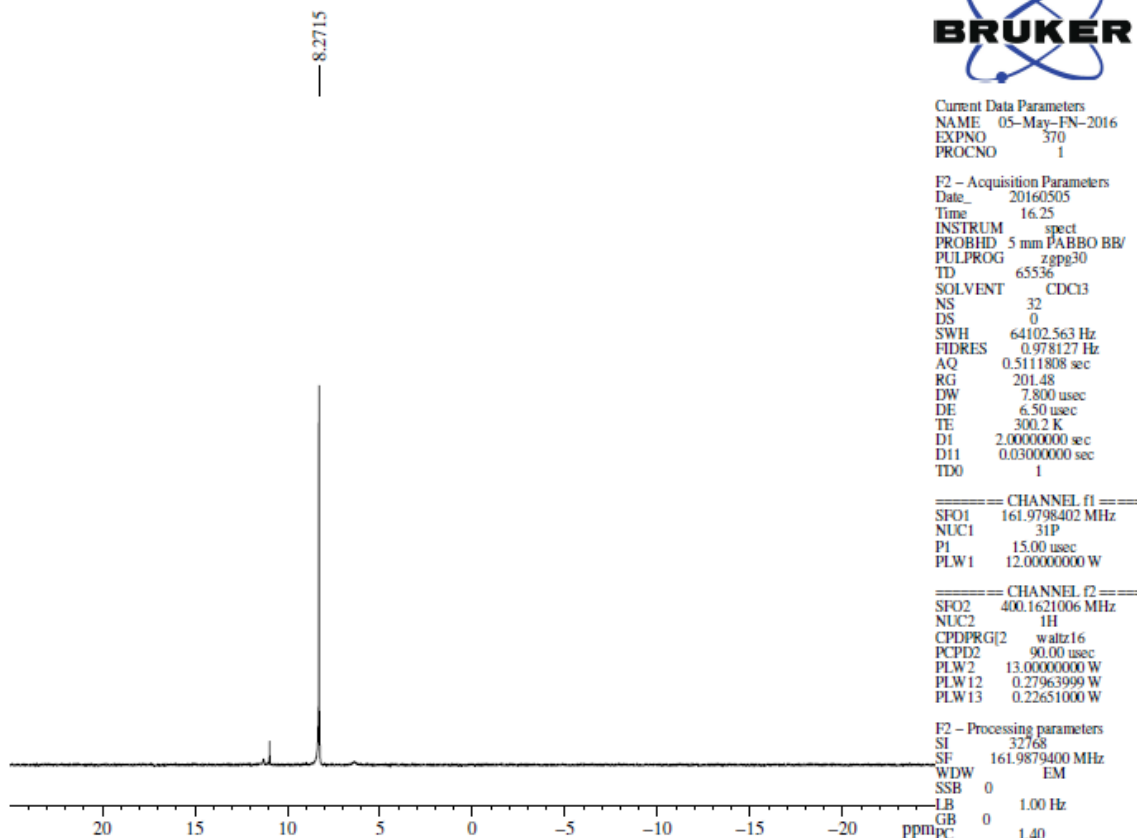Figure 3:  $^{31}\text{P}$  NMR spectrum of 3a

NRAT-IV-242

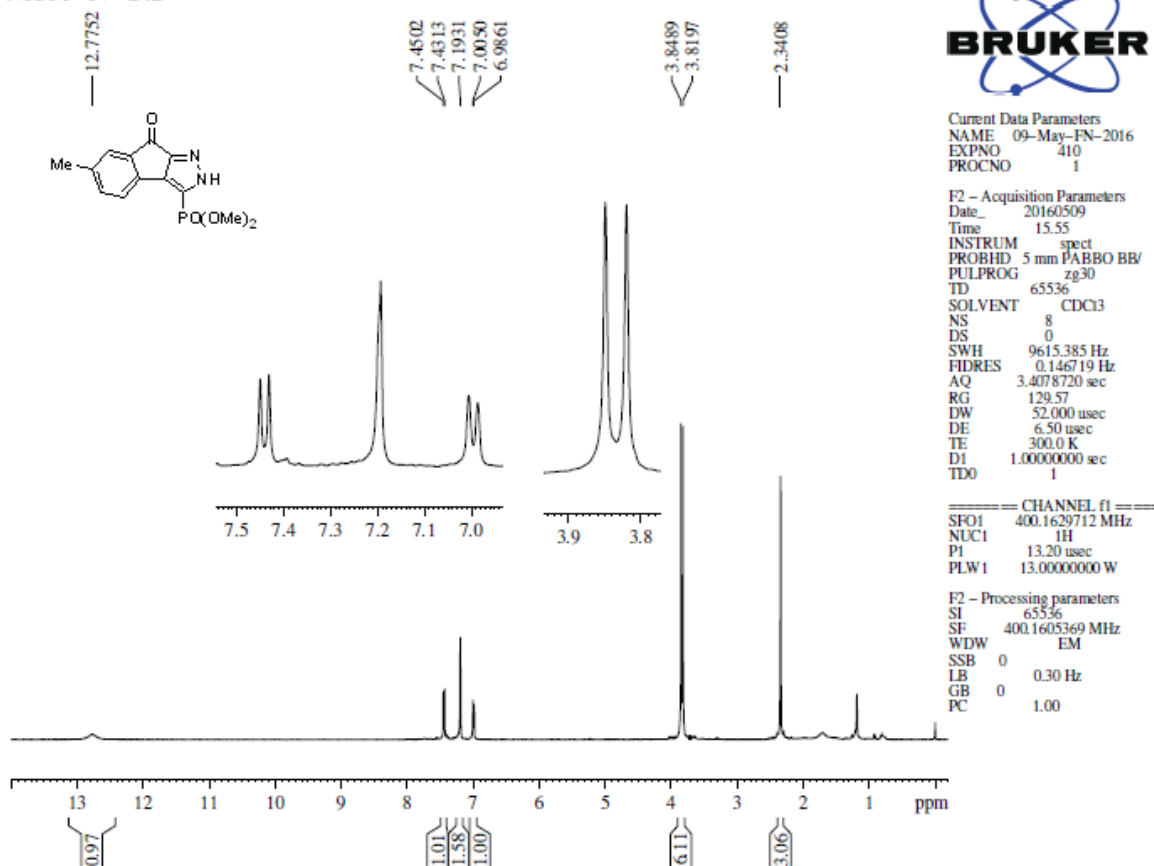Figure 4:  $^1\text{H}$  NMR spectrum of 3b

NR-AT-IV-242

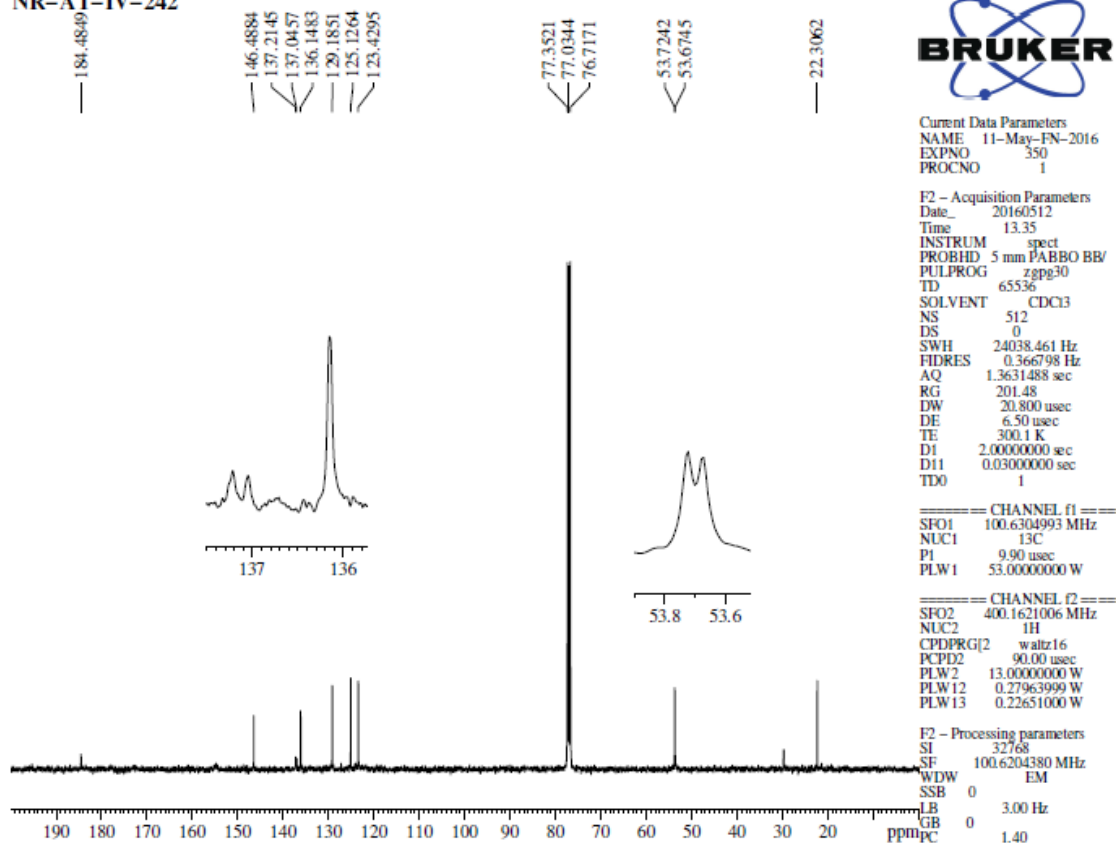

Figure 5:  $^{13}\text{C}$  NMR spectrum of 3b

NRAT-IV-242

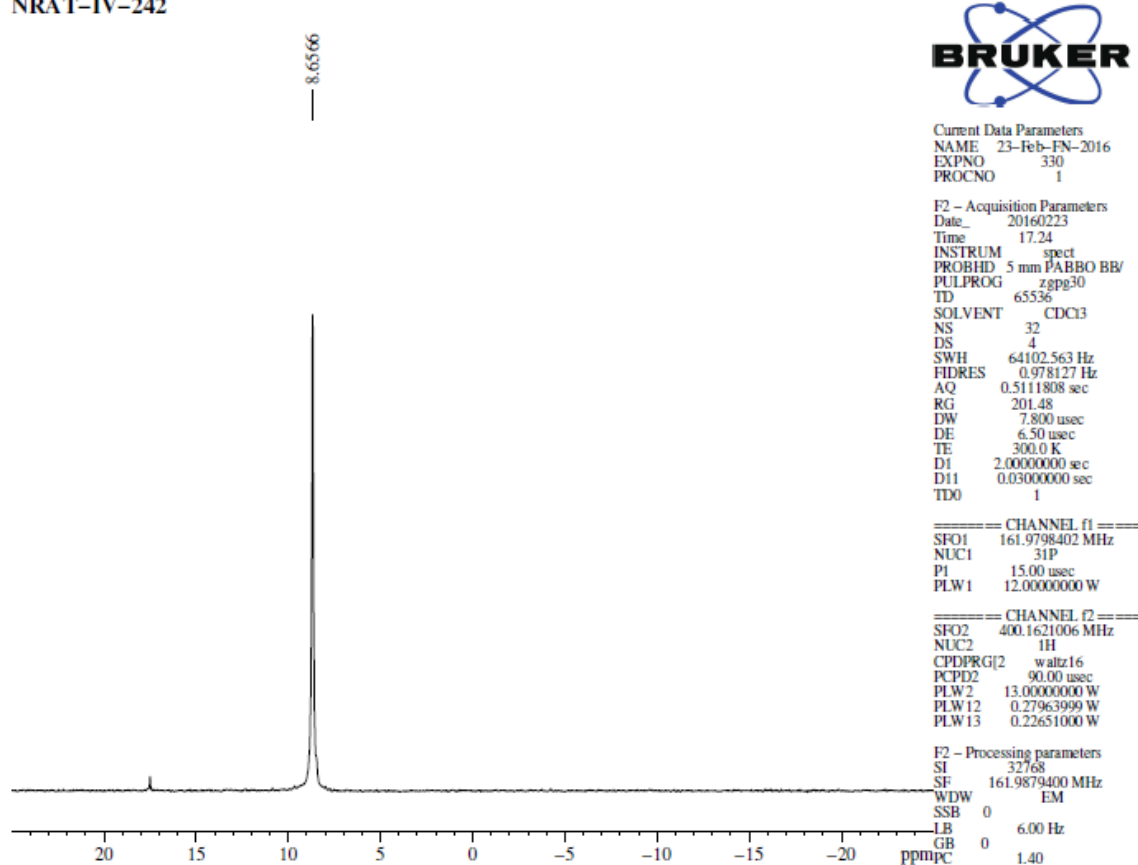

Figure 6:  $^{31}\text{P}$  NMR spectrum of 3b

NRAT-IV-288

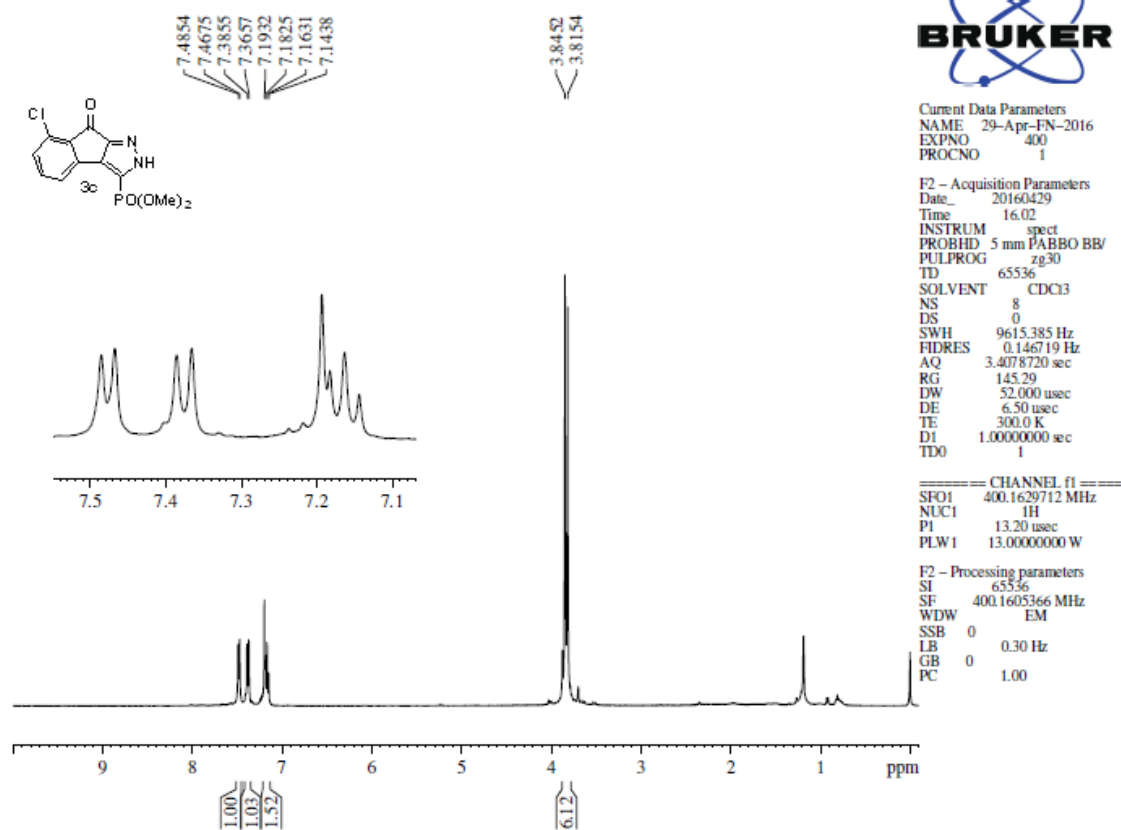Figure 7: <sup>1</sup>H NMR spectrum of 3c

NRAT-IV-288

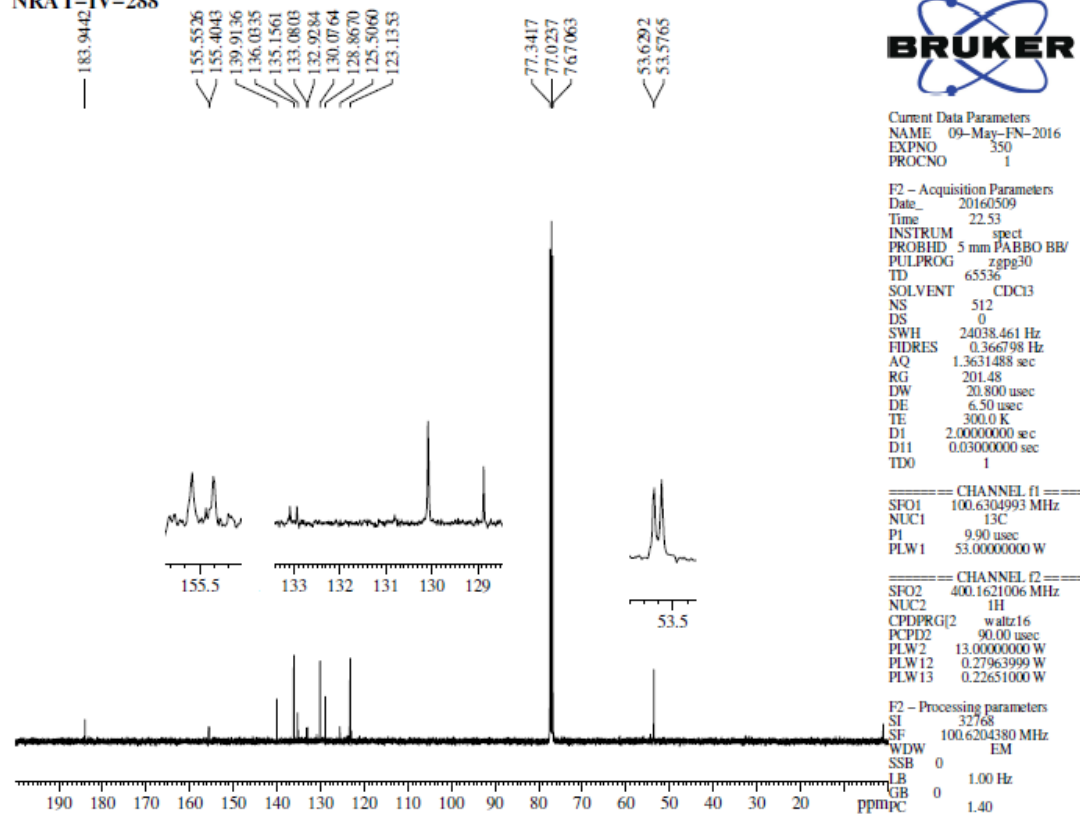Figure 8: <sup>13</sup>C NMR spectrum of 3c

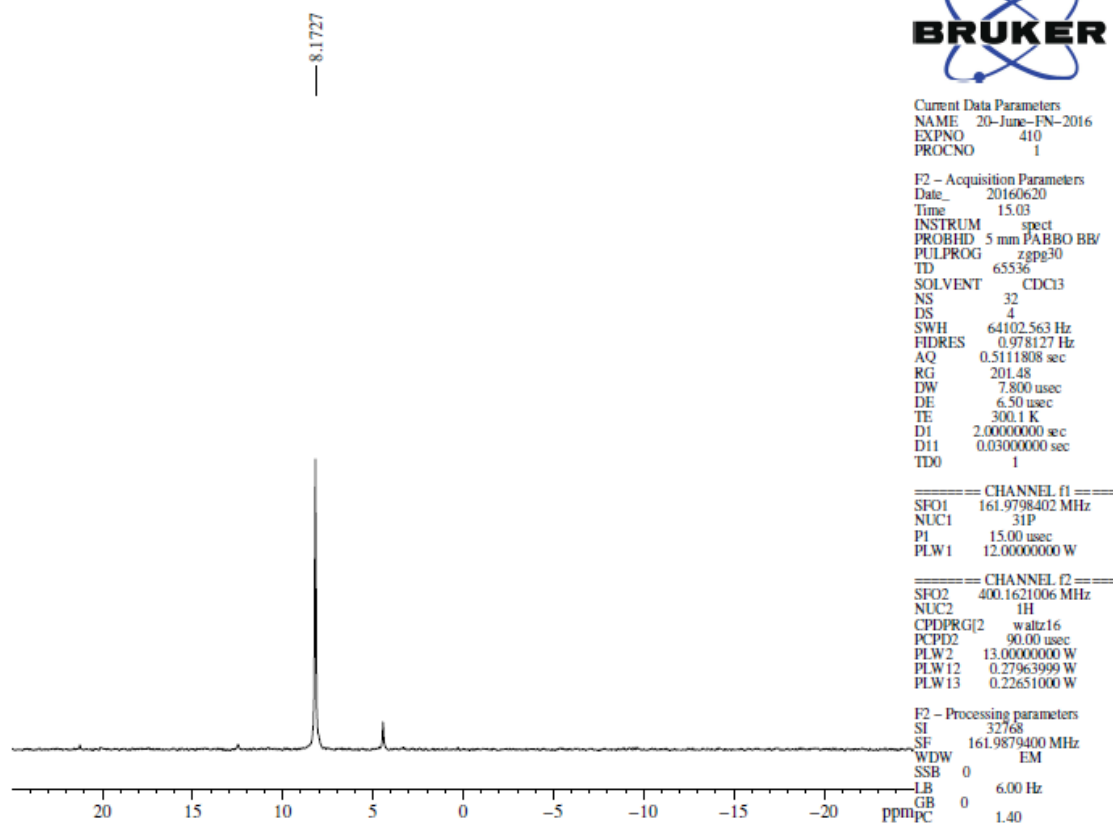Figure 9:  $^{31}\text{P}$  NMR spectrum of 3c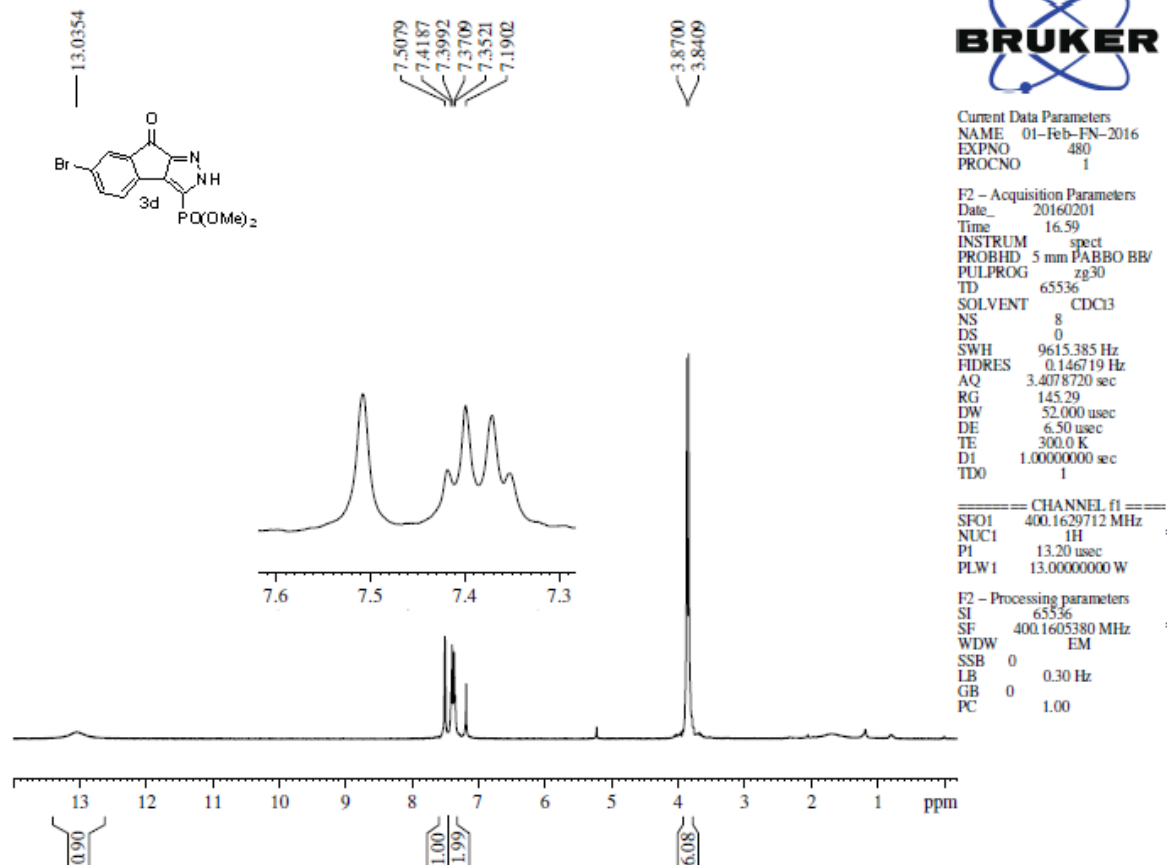Figure 10:  $^1\text{H}$  NMR spectrum of 3d

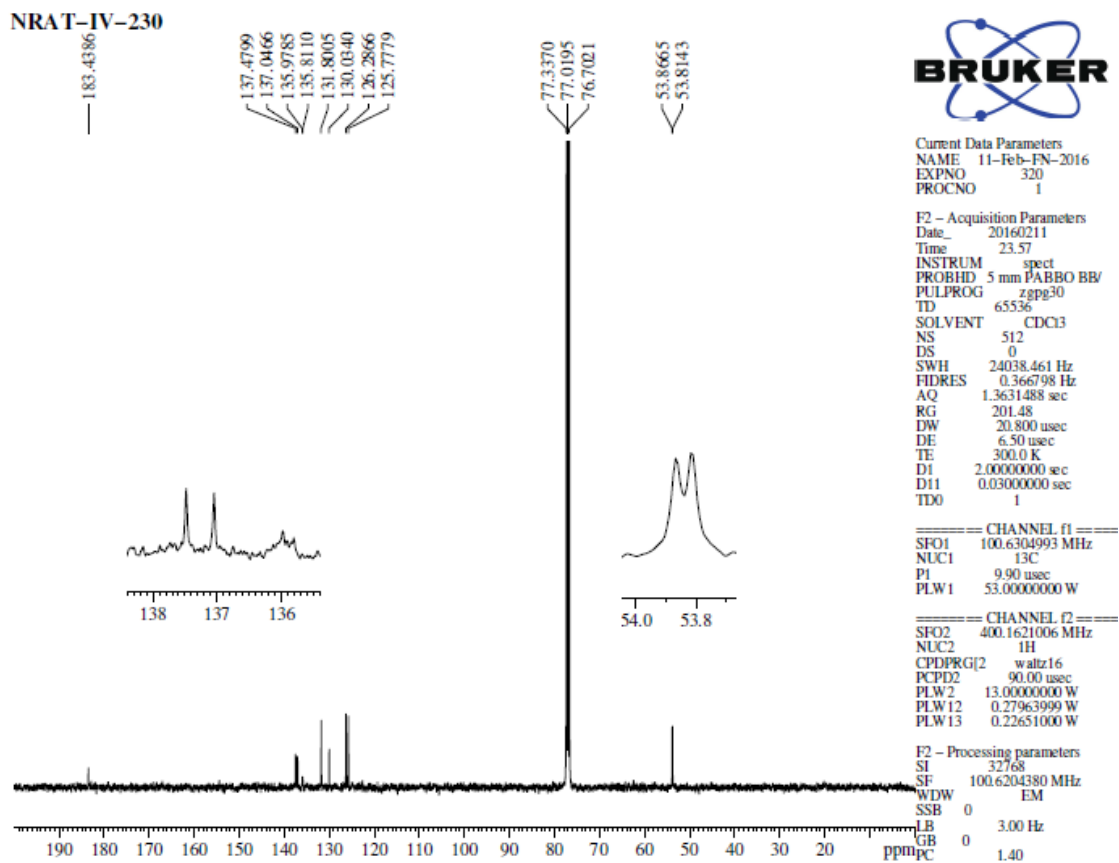

Figure 11:  $^{13}\text{C}$  NMR spectrum of 3d

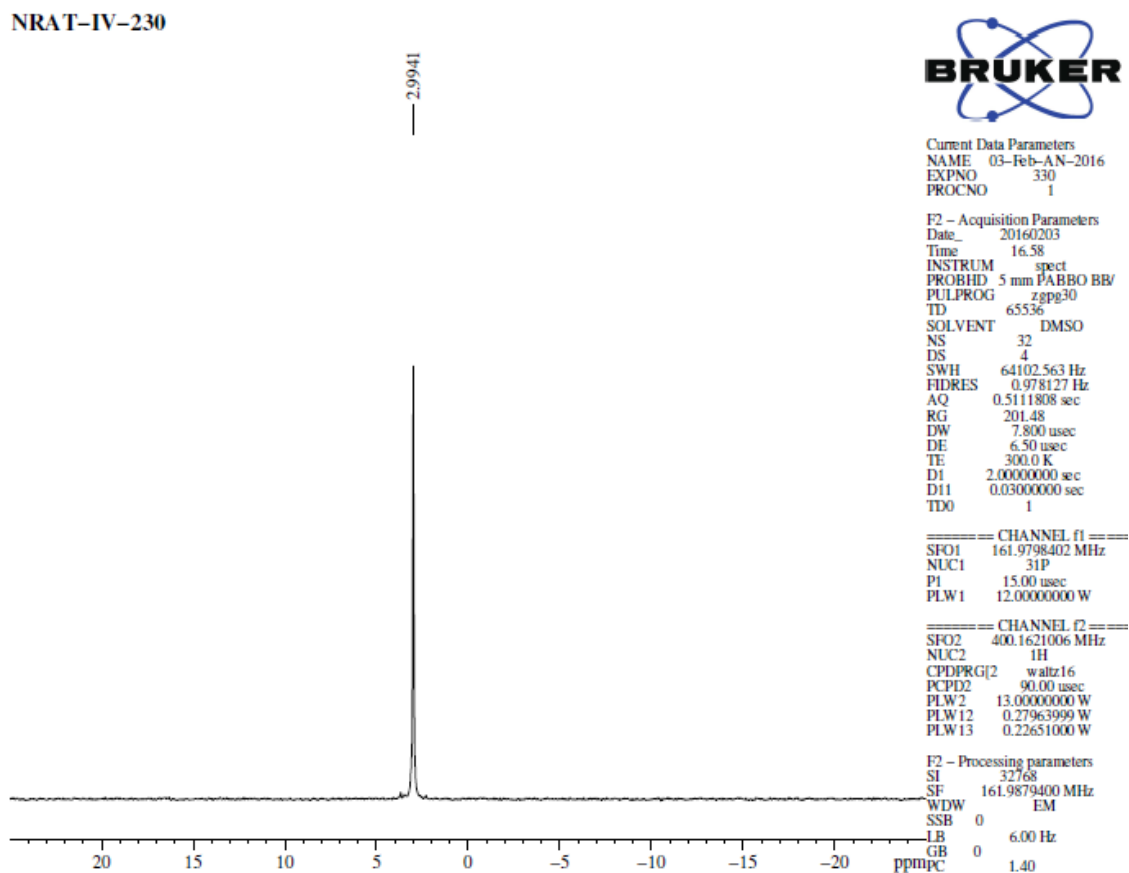

Figure 12:  $^{31}\text{P}$  NMR spectrum of 3d



NRAT-IV-206

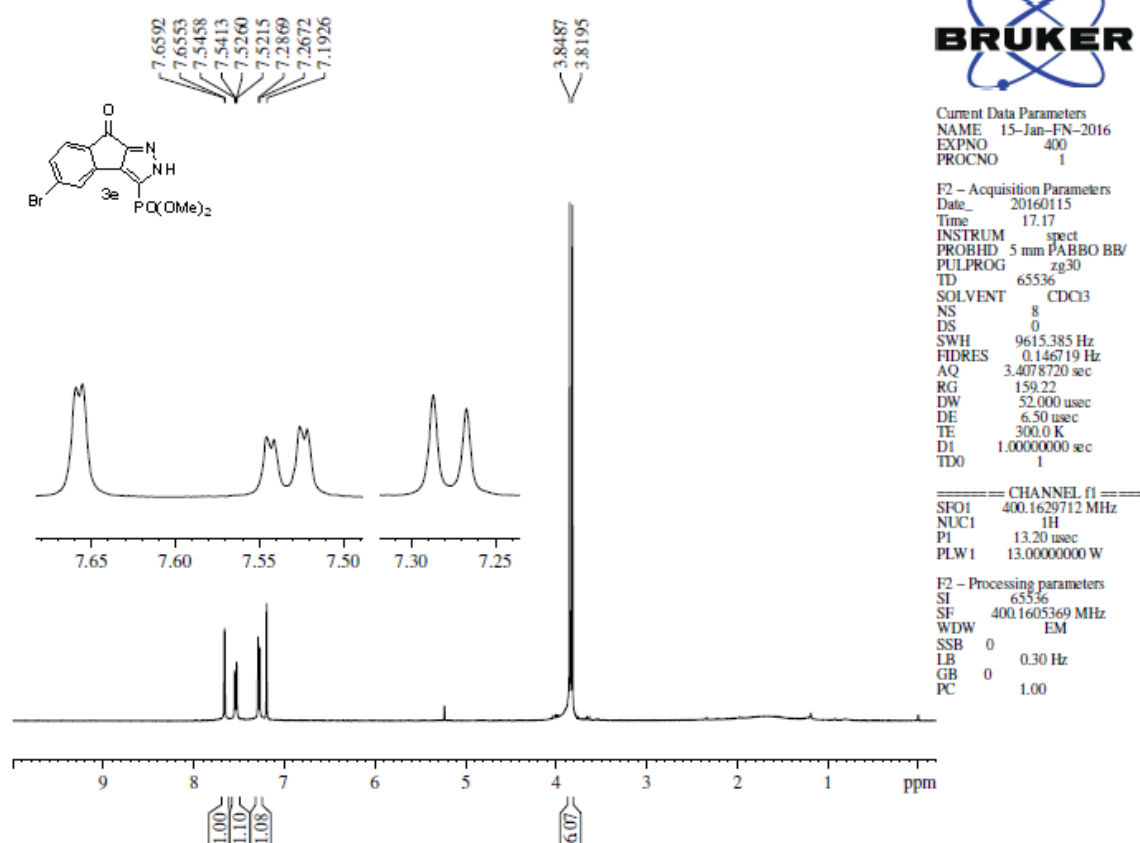

Figure 13: <sup>1</sup>H NMR spectrum of 3e

NR-AT-IV-206

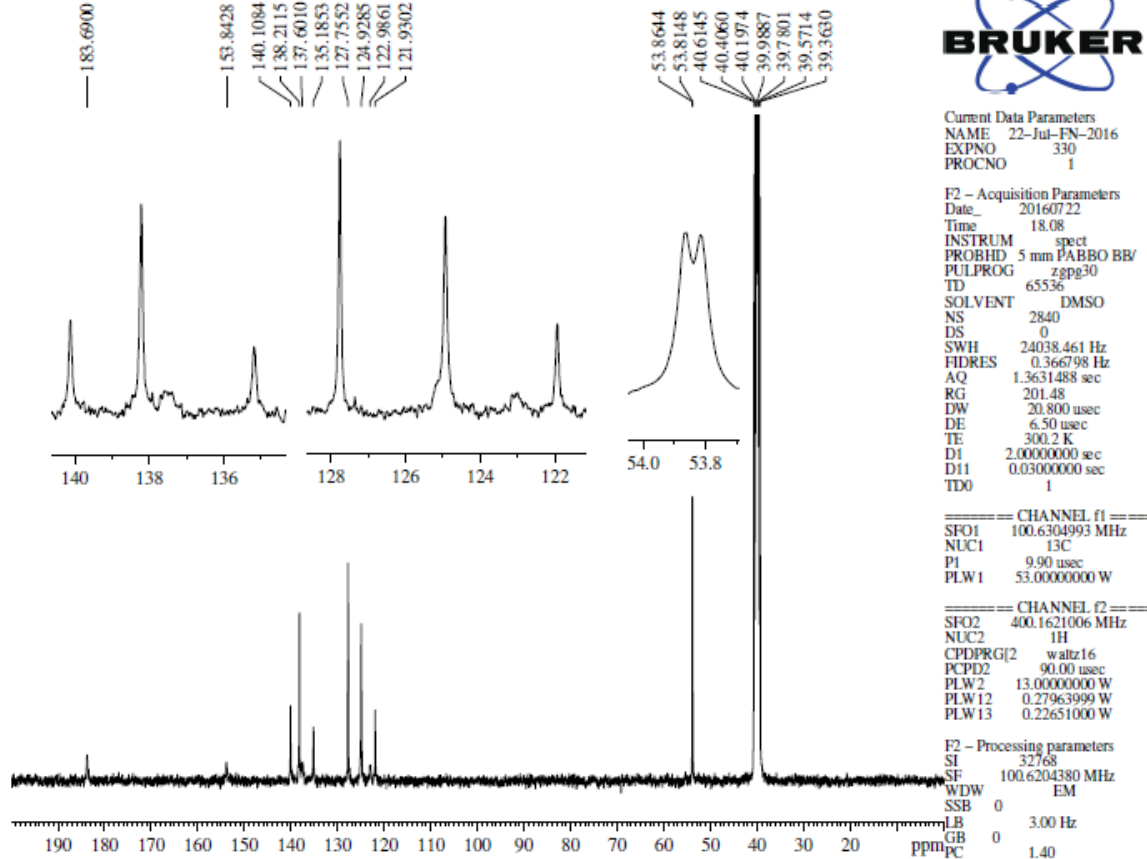

Figure 14: <sup>13</sup>C NMR spectrum of 3e

NR-AT-IV-206

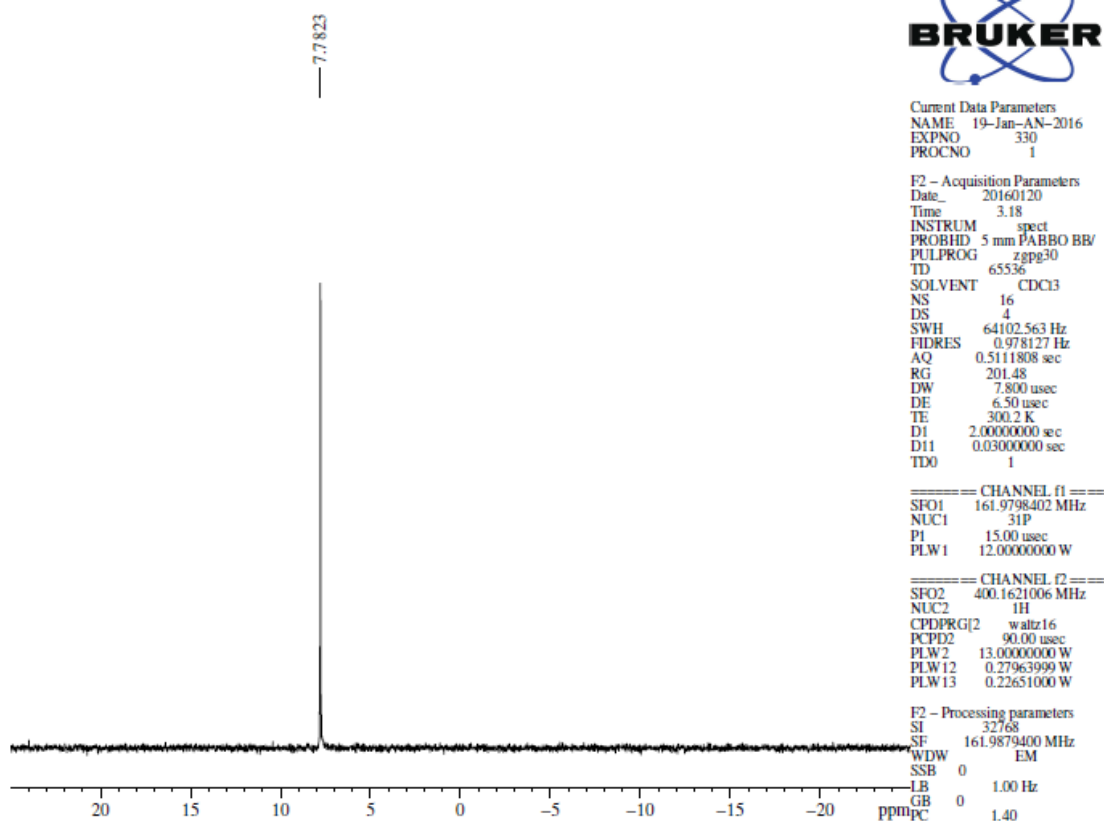

Figure 15: <sup>31</sup>P NMR spectrum of 3e

NRAT-IV-266

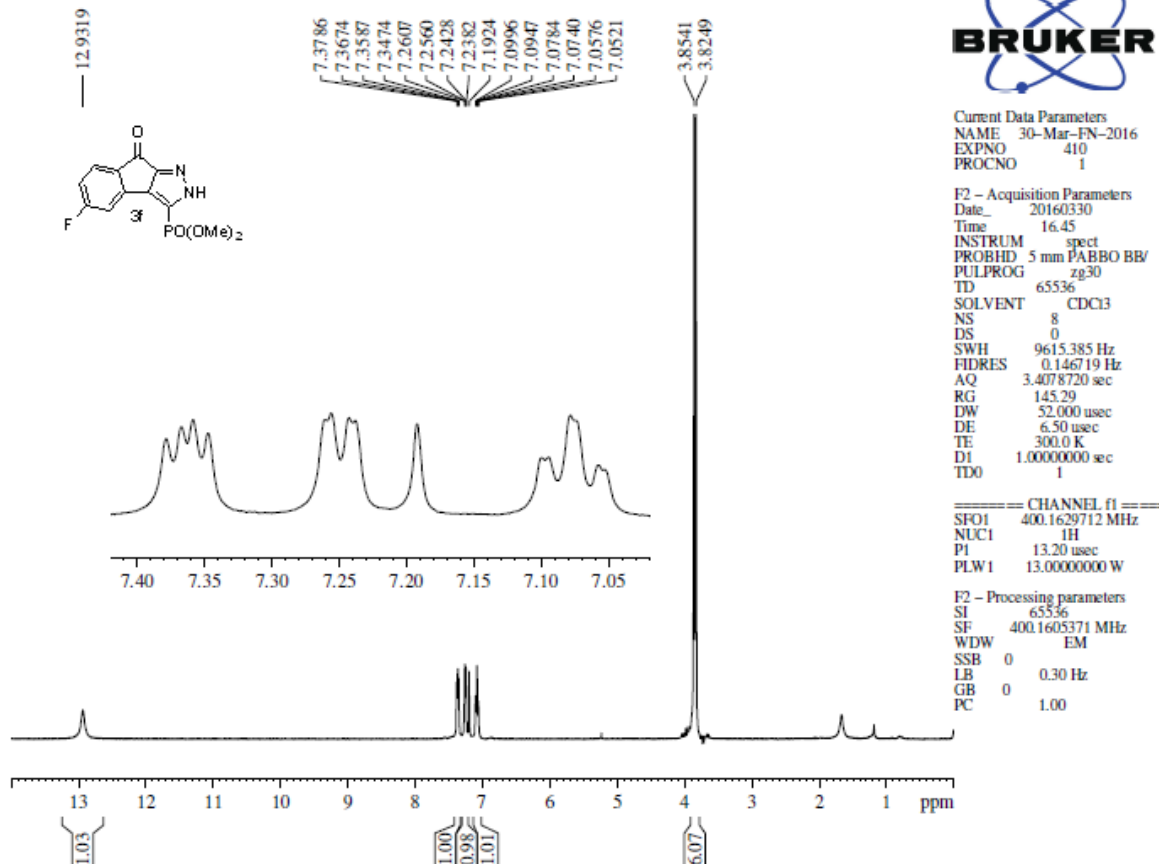

Figure 16: <sup>1</sup>H NMR spectrum of 3f

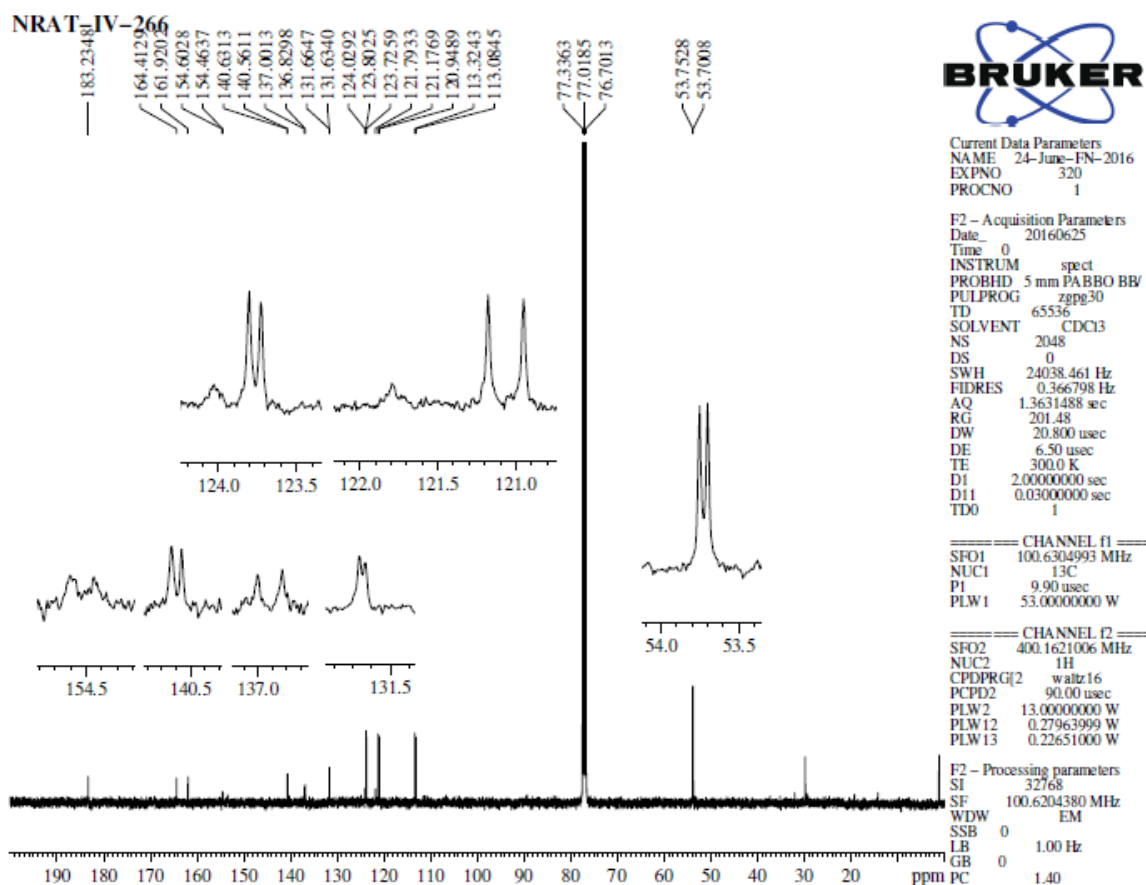

Figure 17:  $^{13}\text{C}$  NMR spectrum of 3f

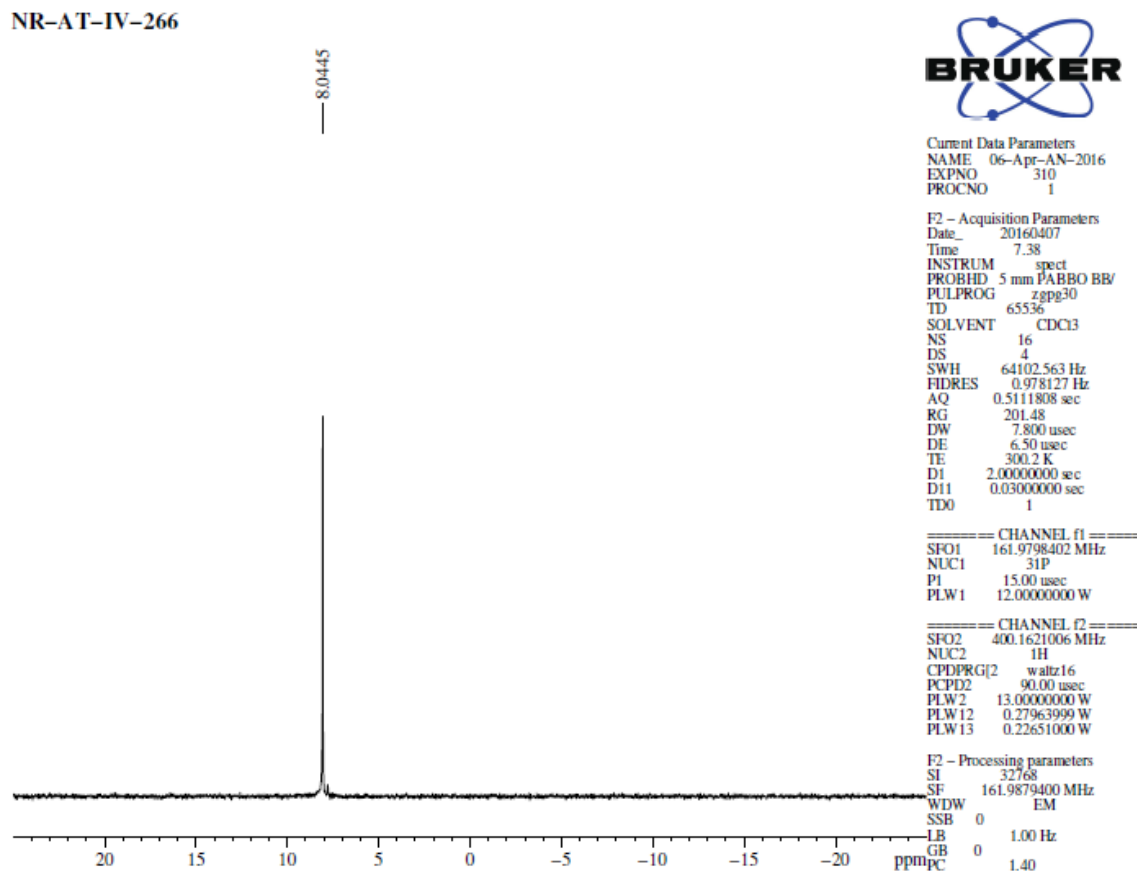

Figure 18:  $^{31}\text{P}$  NMR spectrum of 3f

NRAT-214

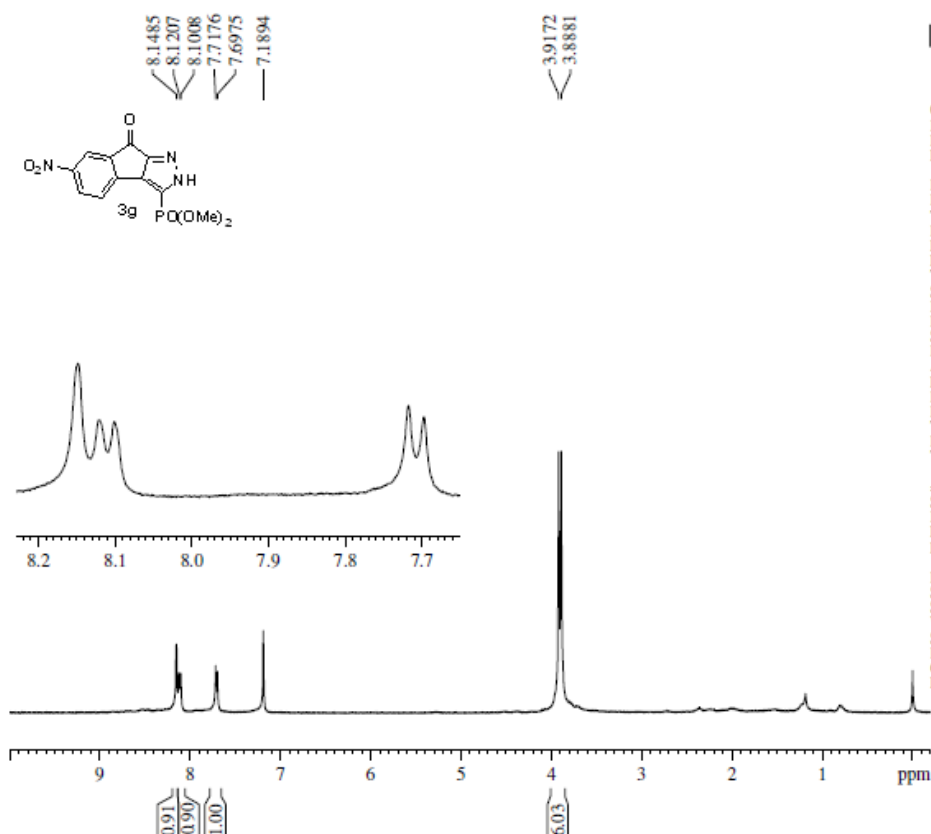

Figure 19: <sup>1</sup>H NMR spectrum of 3g

NRAT-IV-214

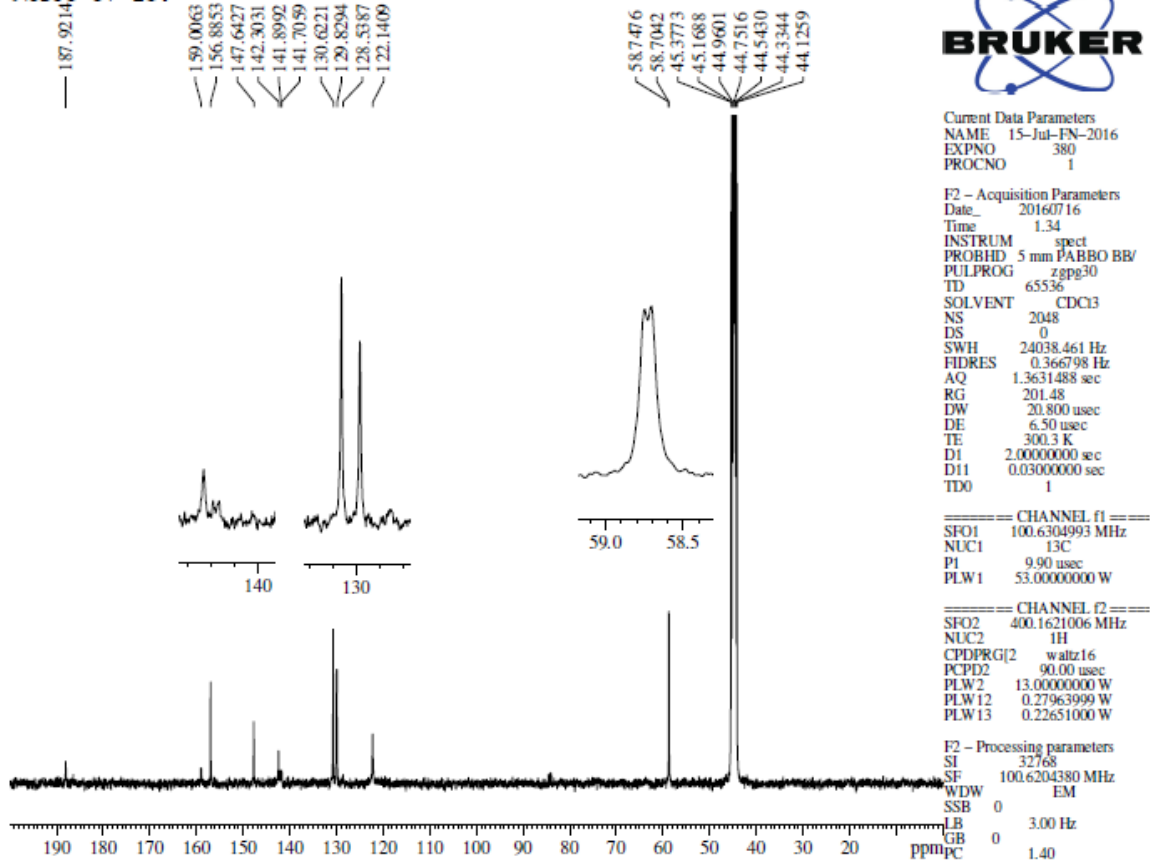

Figure 20: <sup>13</sup>C NMR spectrum of 3g

NRAT-IV-214

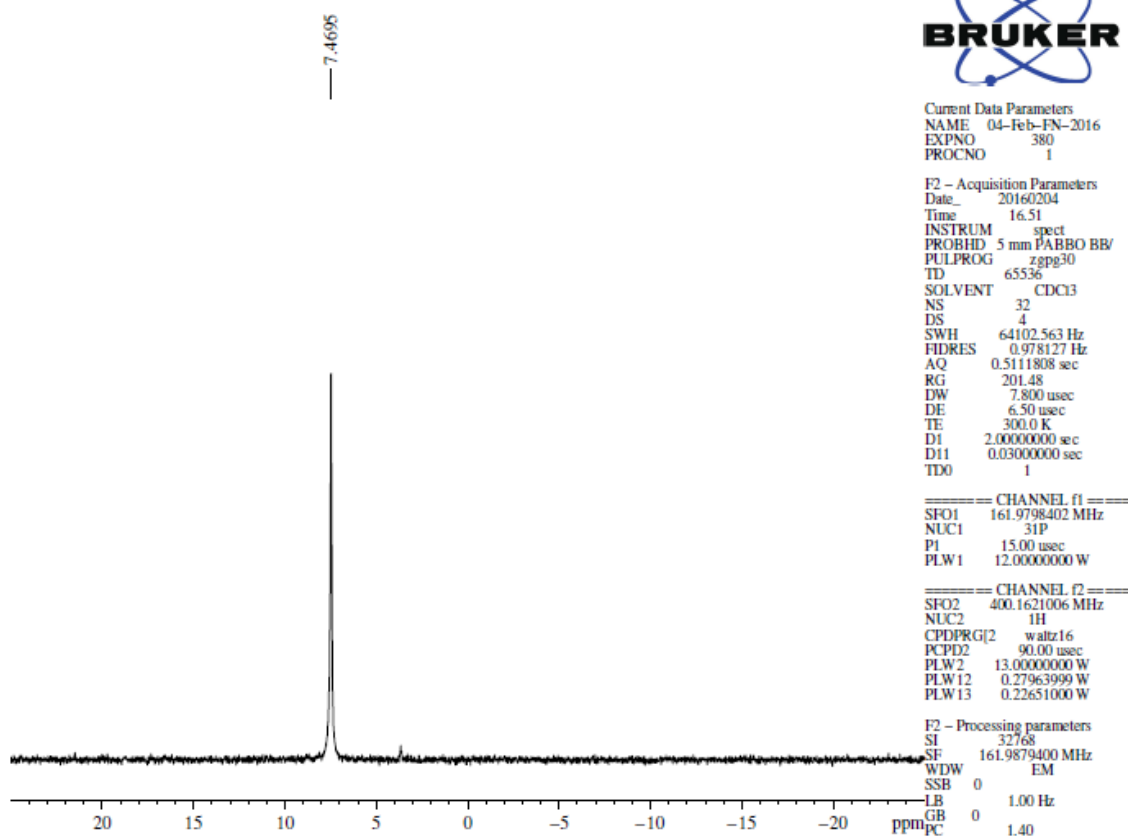Figure 21:  $^{31}\text{P}$  NMR spectrum of 3g

NRAT-IV-211

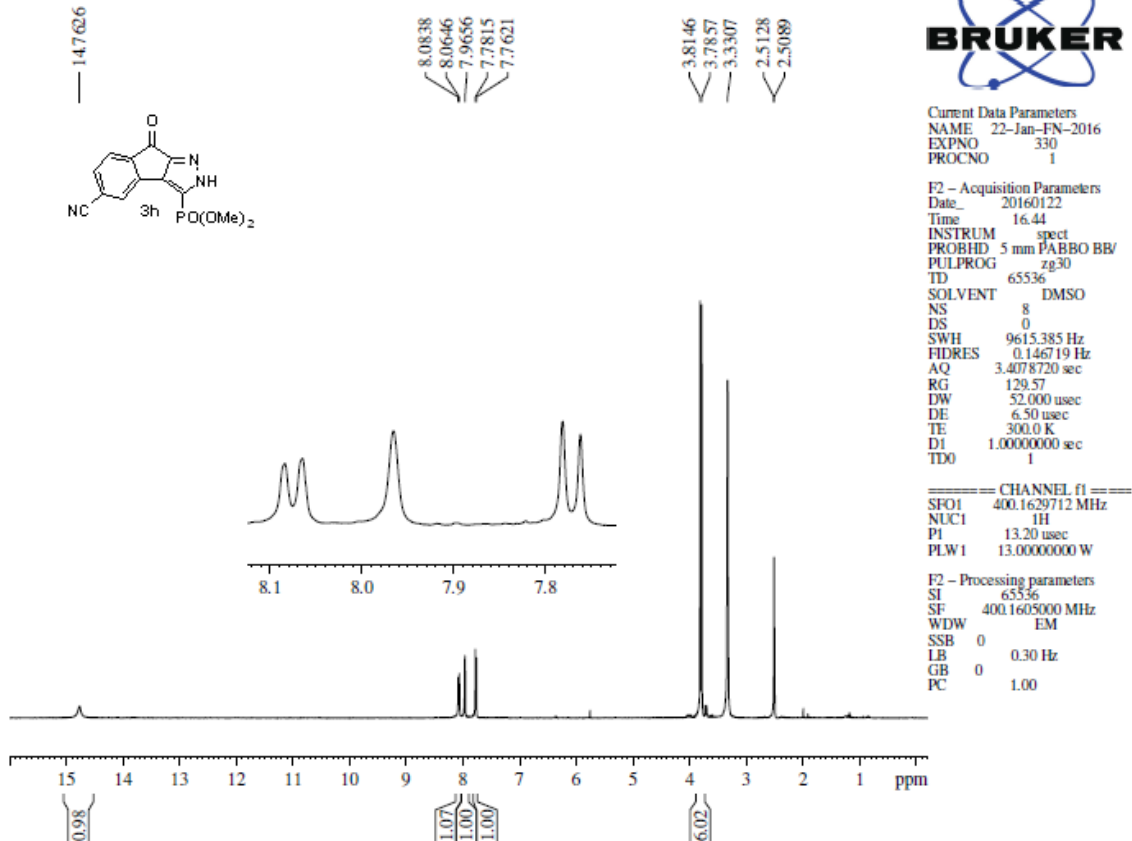Figure 22:  $^1\text{H}$  NMR spectrum of 3h

NRAT-IV-211

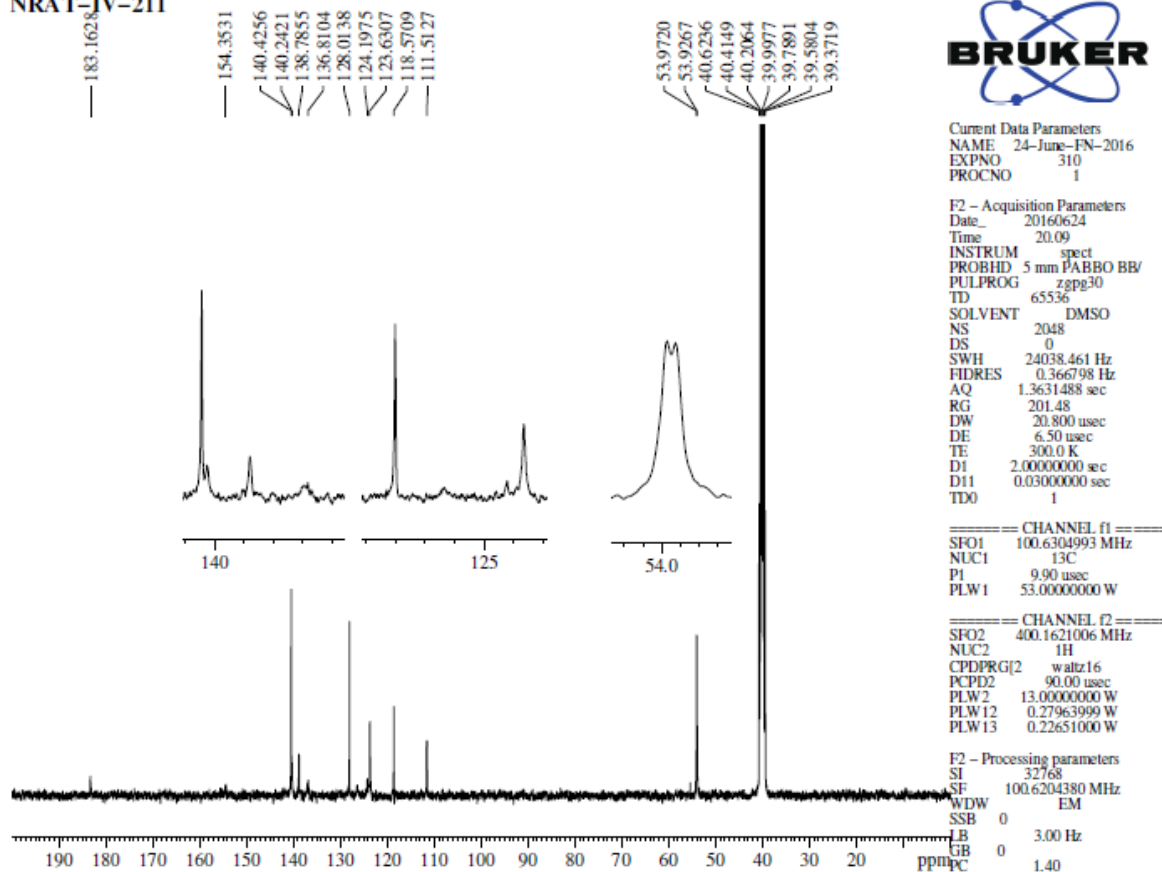Figure 23:  $^{13}\text{C}$  NMR spectrum of 3h

NRAT-IV-211

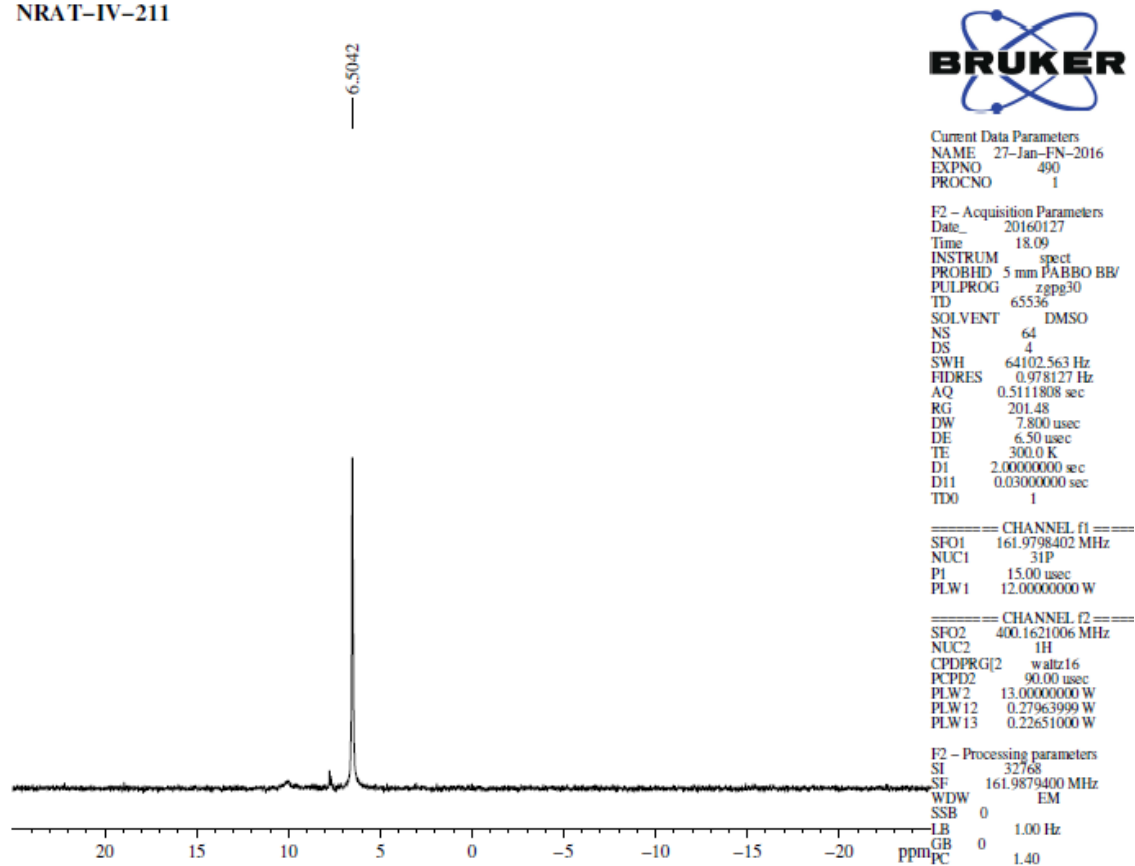Figure 24:  $^{31}\text{P}$  NMR spectrum of 3h

NRAT-IV-210

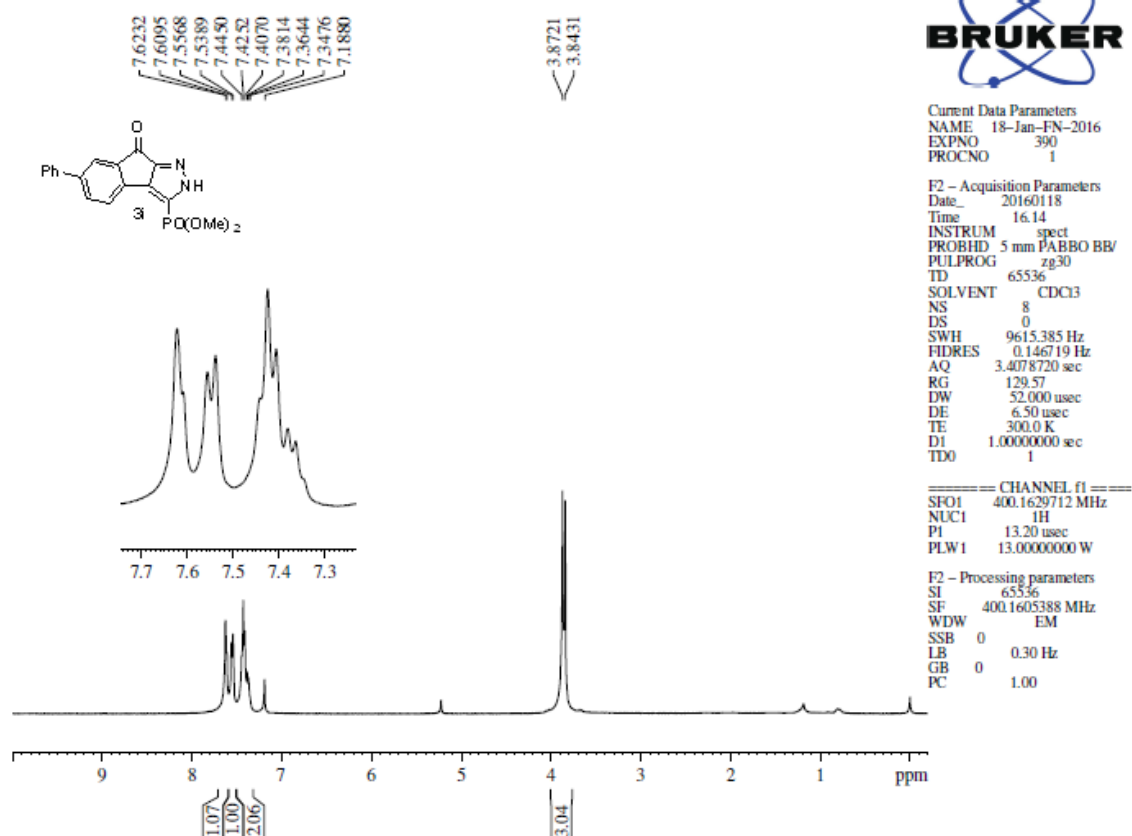

Figure 25: <sup>1</sup>H NMR spectrum of **3i**

NR-AT-IV-210

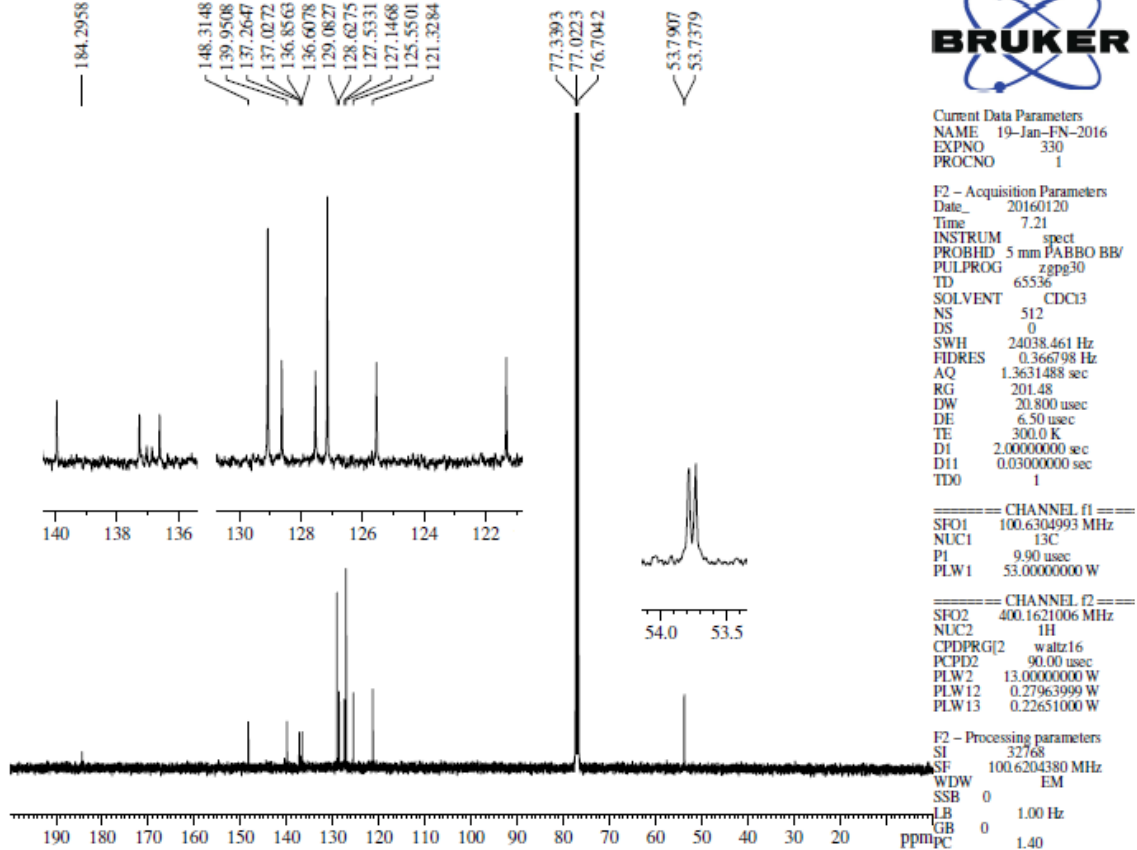

Figure 26: <sup>13</sup>C NMR spectrum of **3i**



NR-AT-IV-210

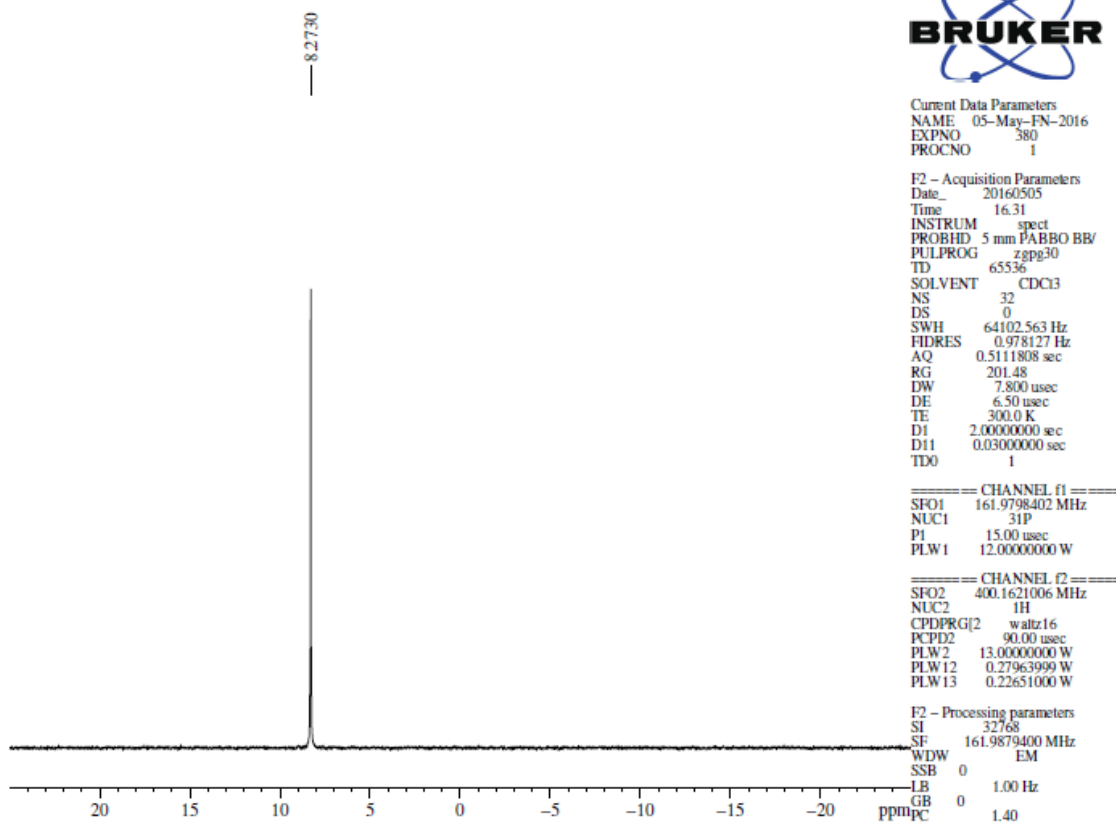

Figure 27: <sup>31</sup>P NMR spectrum of 3i

NRAT IV 218

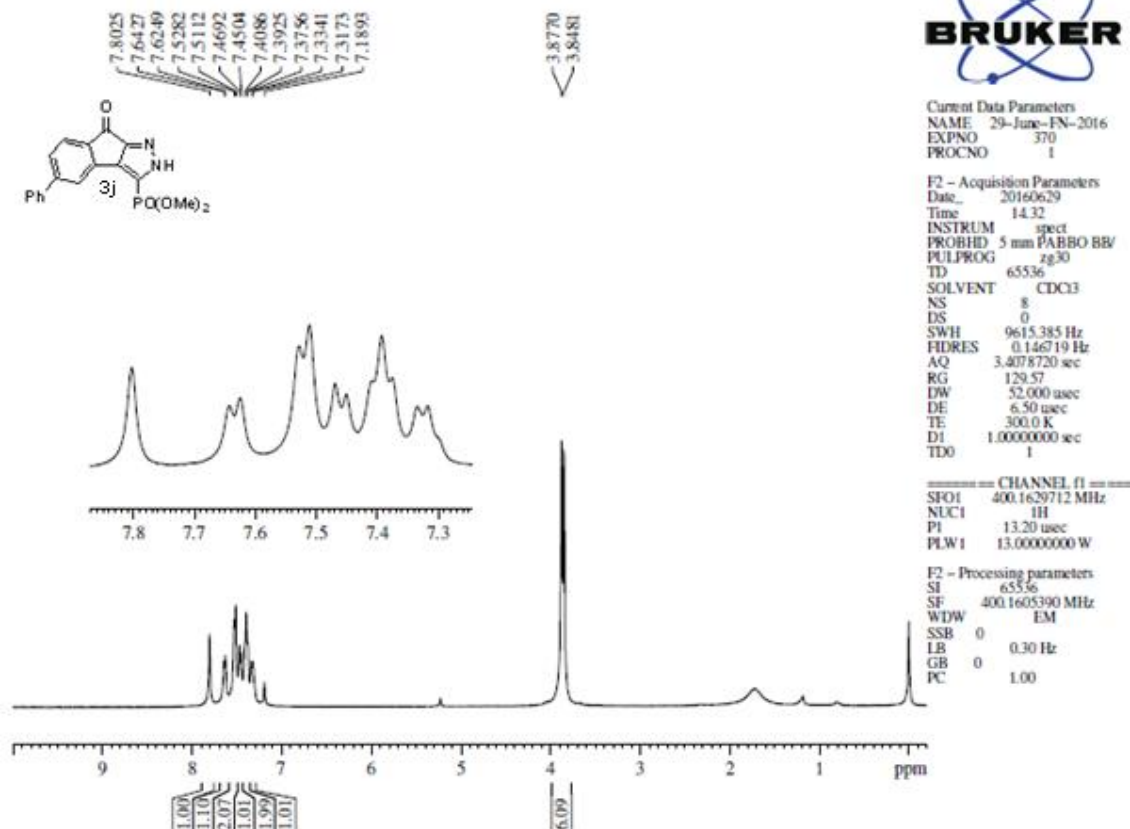

Figure 28: <sup>1</sup>H NMR spectrum of 3j



NRAT-IV-218

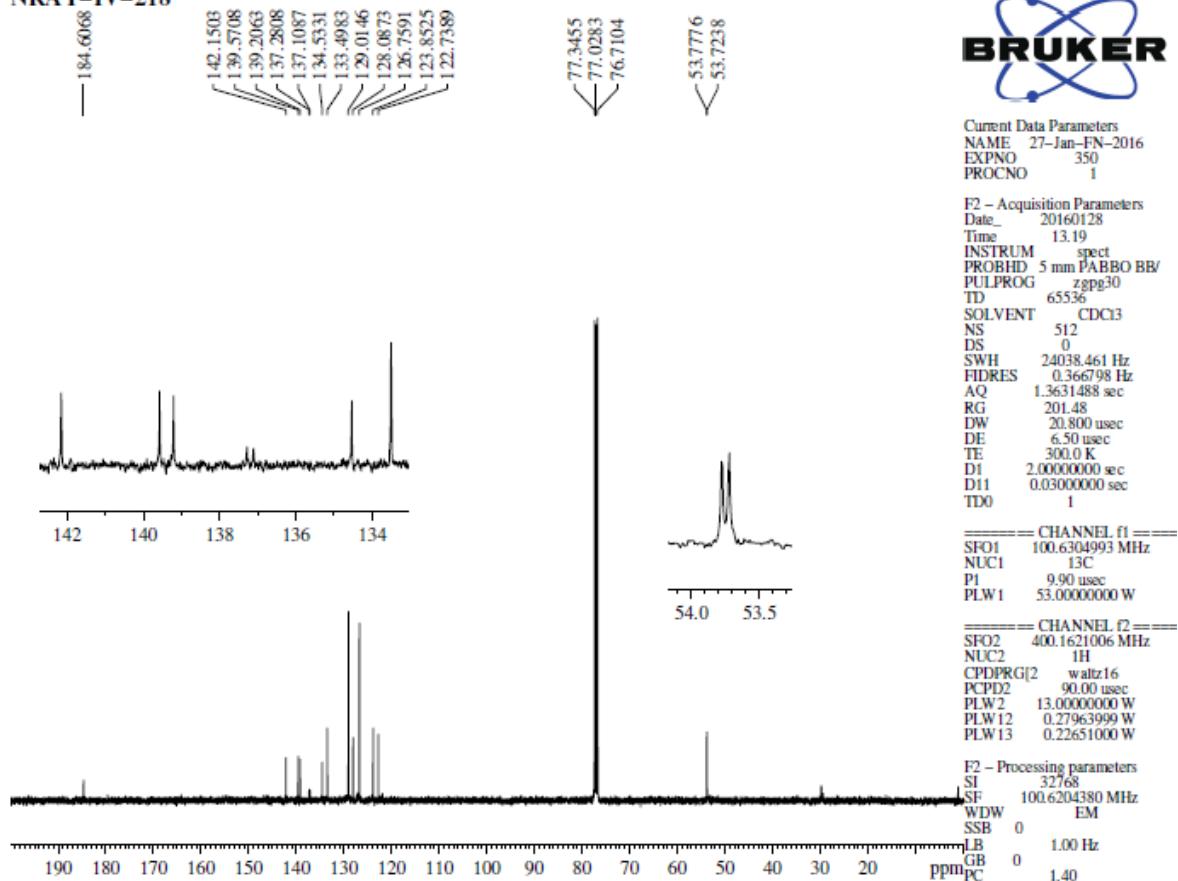Figure 29:  $^{13}\text{C}$  NMR spectrum of 3j

NRAT-IV-218

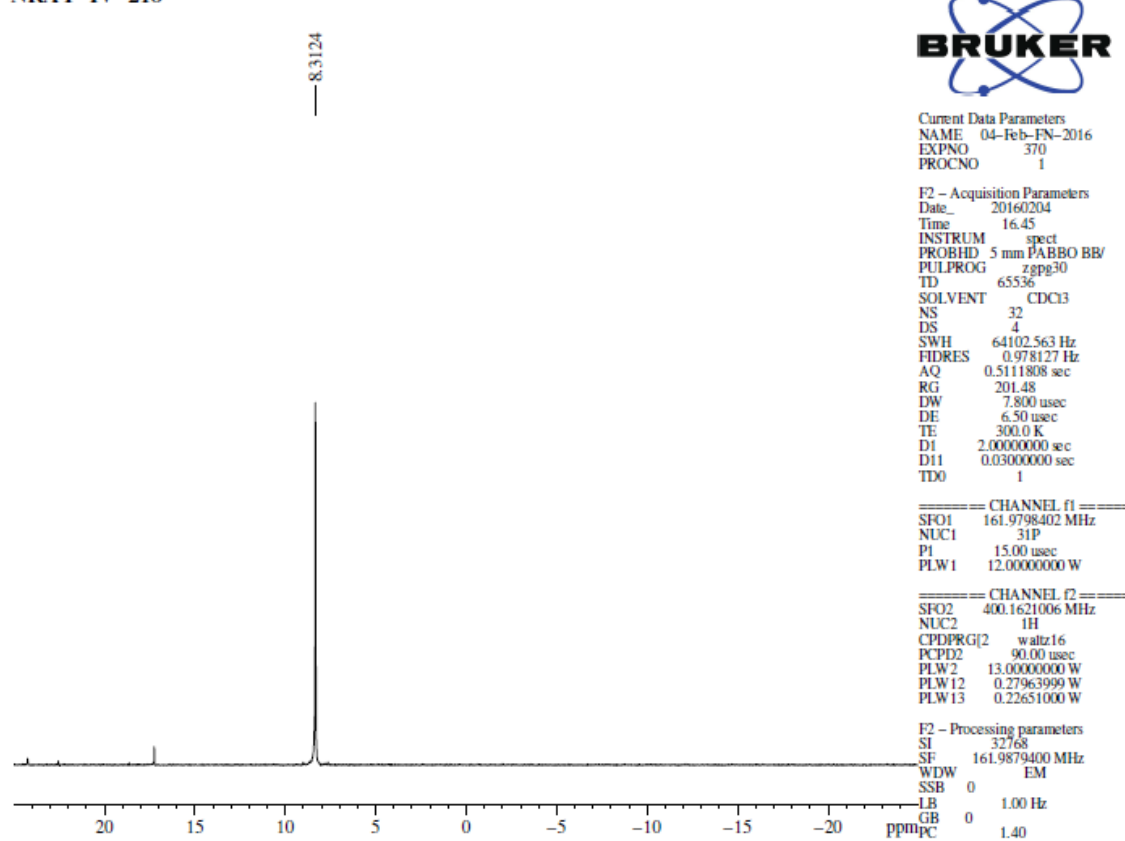Figure 30:  $^{31}\text{P}$  NMR spectrum of 3j

NRAT-IV-233

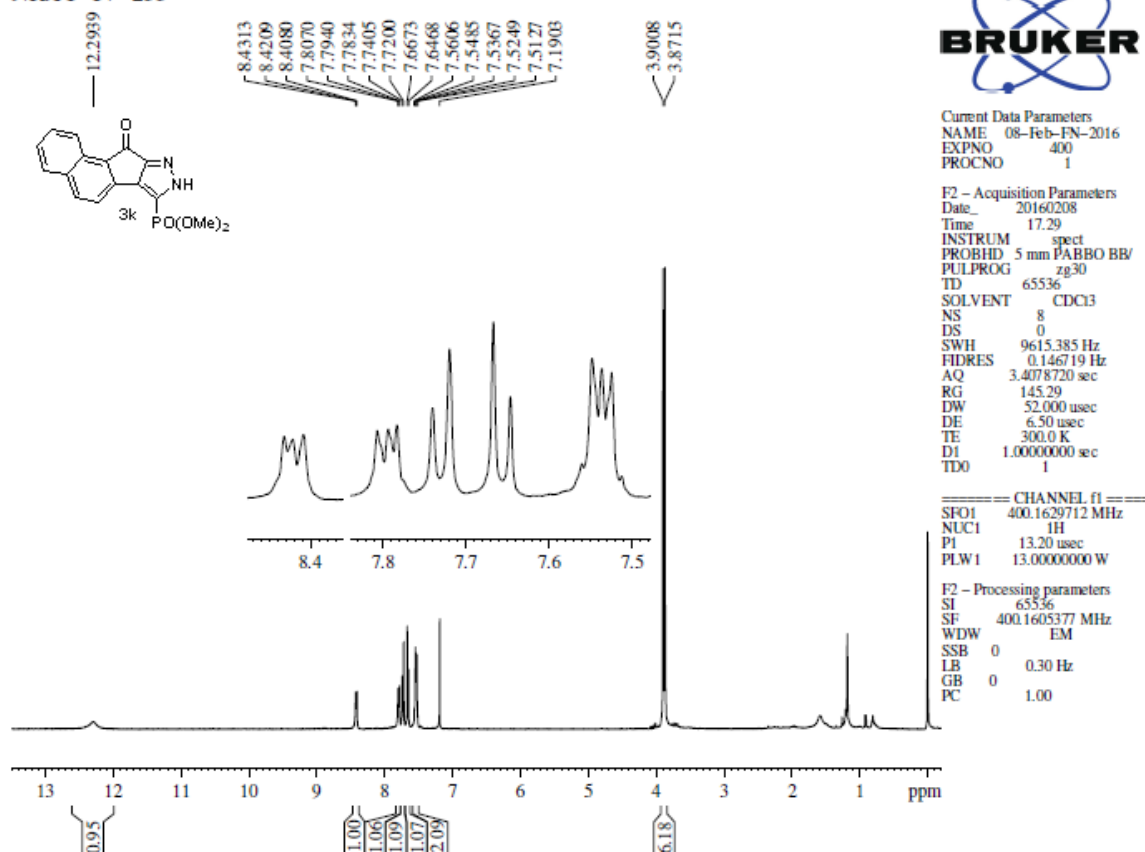

Figure 31: <sup>1</sup>H NMR spectrum of 3k

NR-AT-IV-233

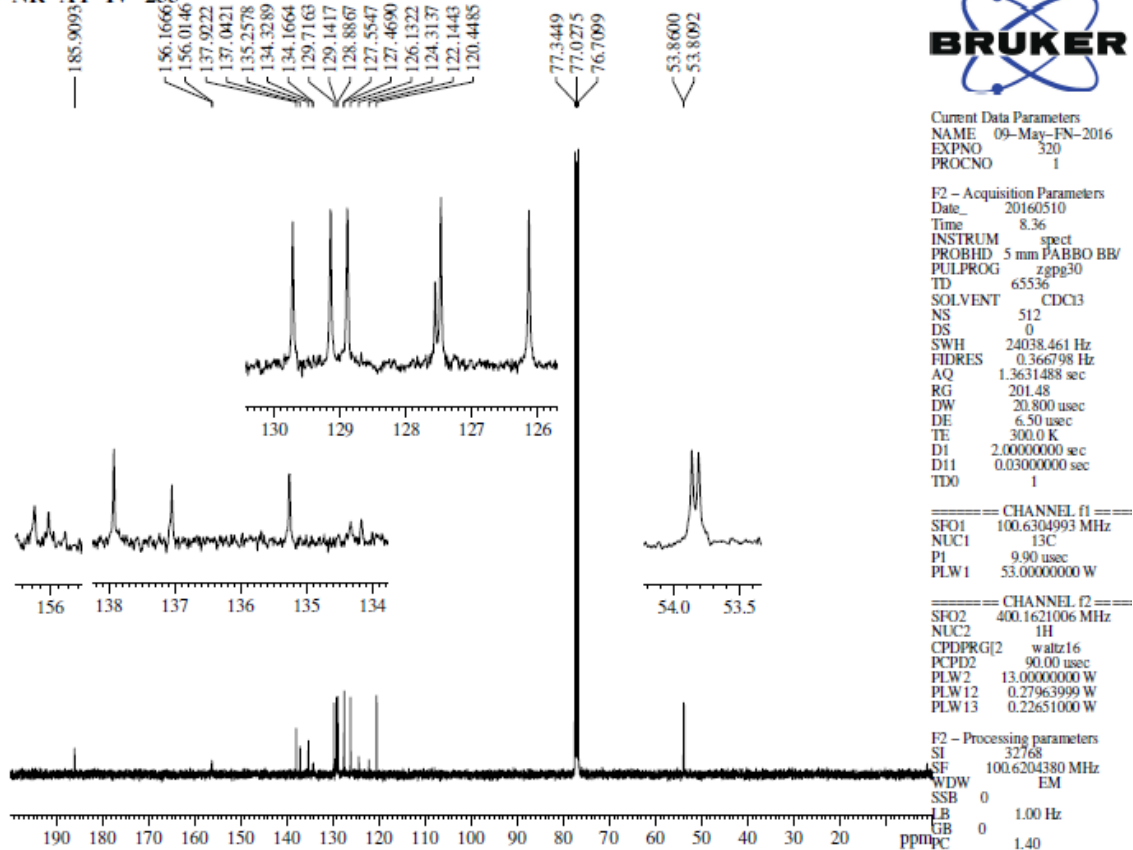

Figure 32: <sup>13</sup>C NMR spectrum of 3k

NR-AT-IV-233

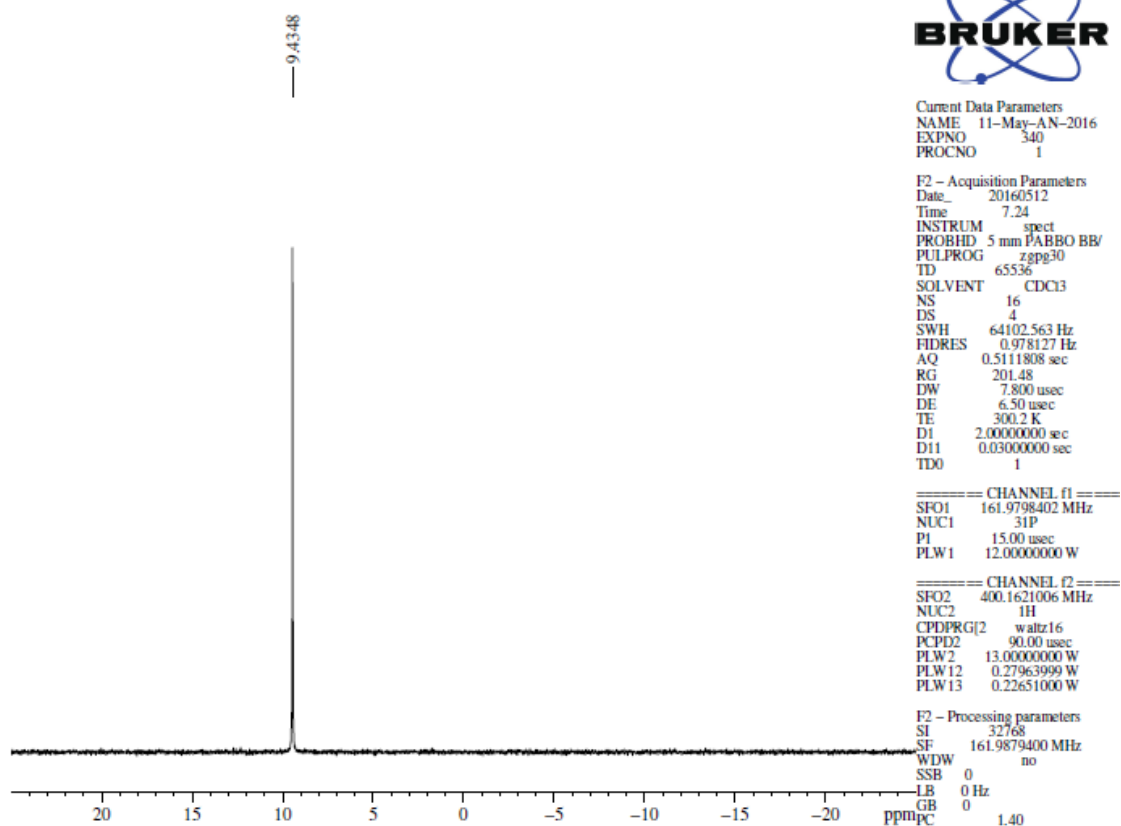

Figure 33: <sup>31</sup>P NMR spectrum of 3k

NR-AT-IV-289

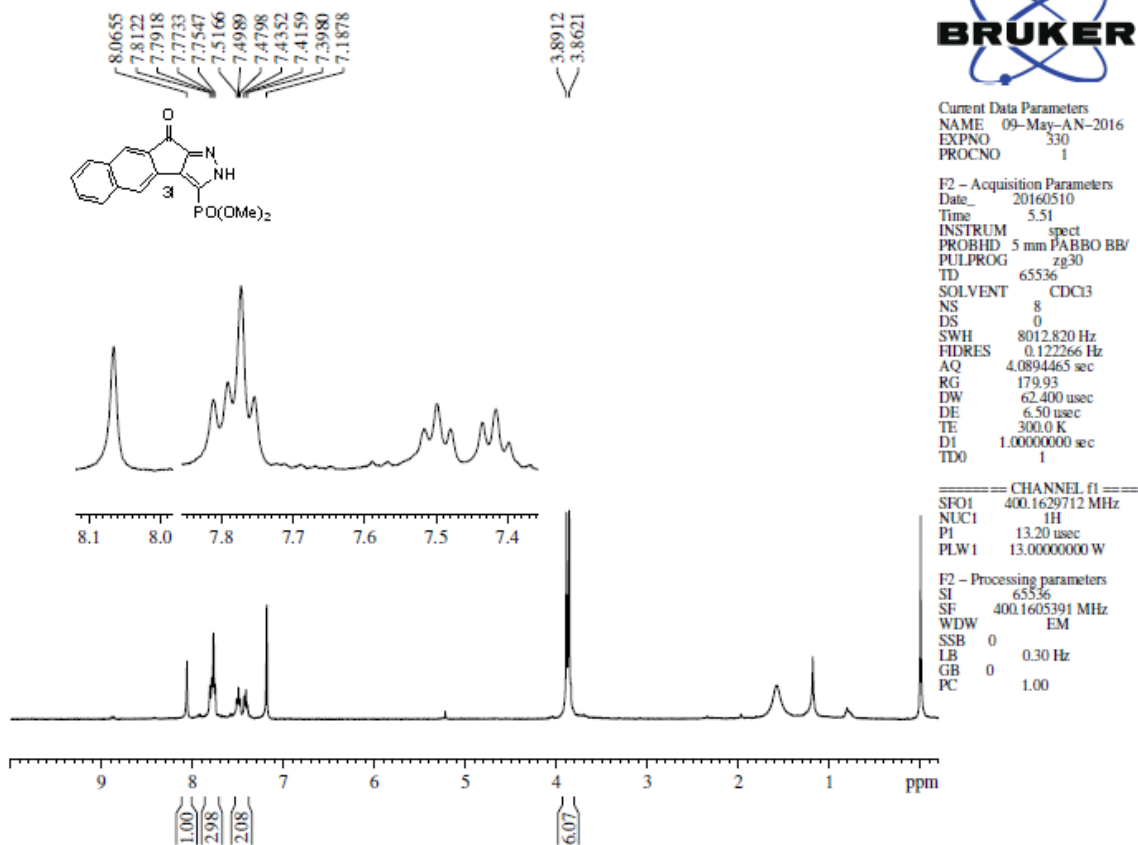

Figure 34: <sup>1</sup>H NMR spectrum of 3l

NRAT-IV-289

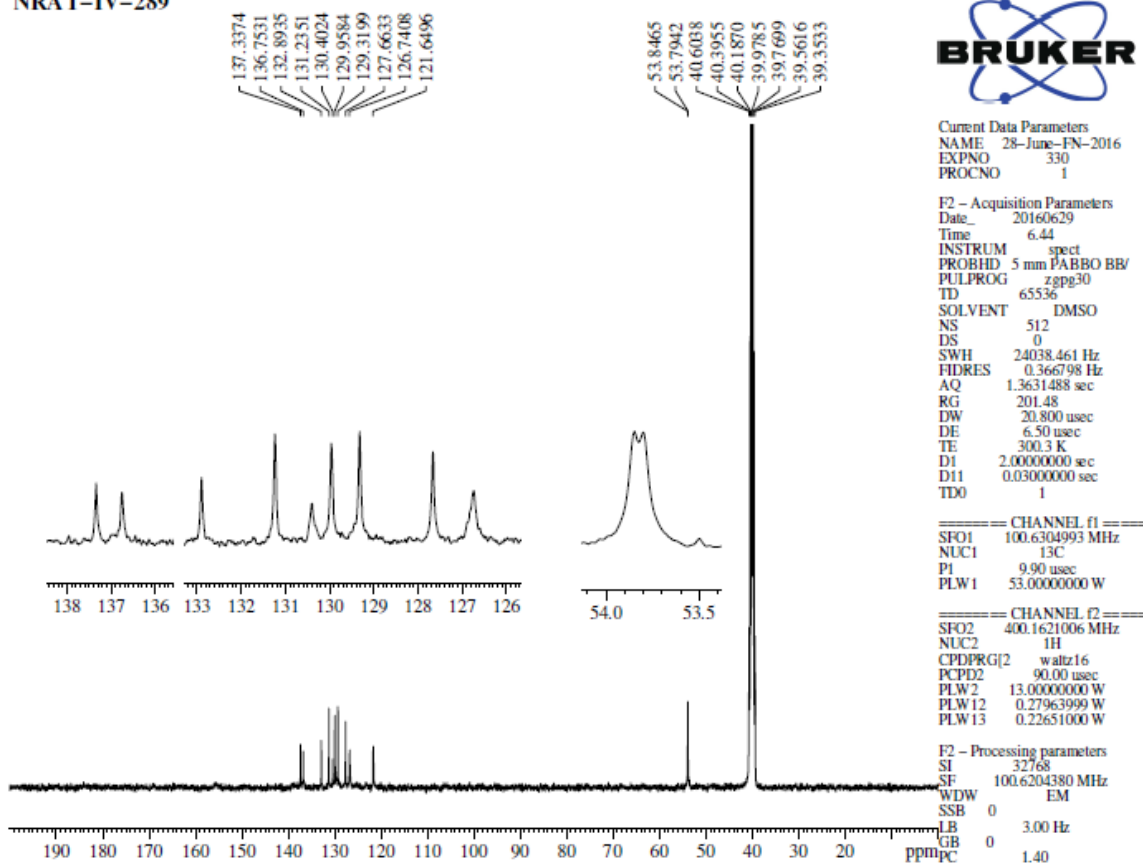

Figure 35:  $^{13}\text{C}$  NMR spectrum of 3l

NR-AT-IV-289

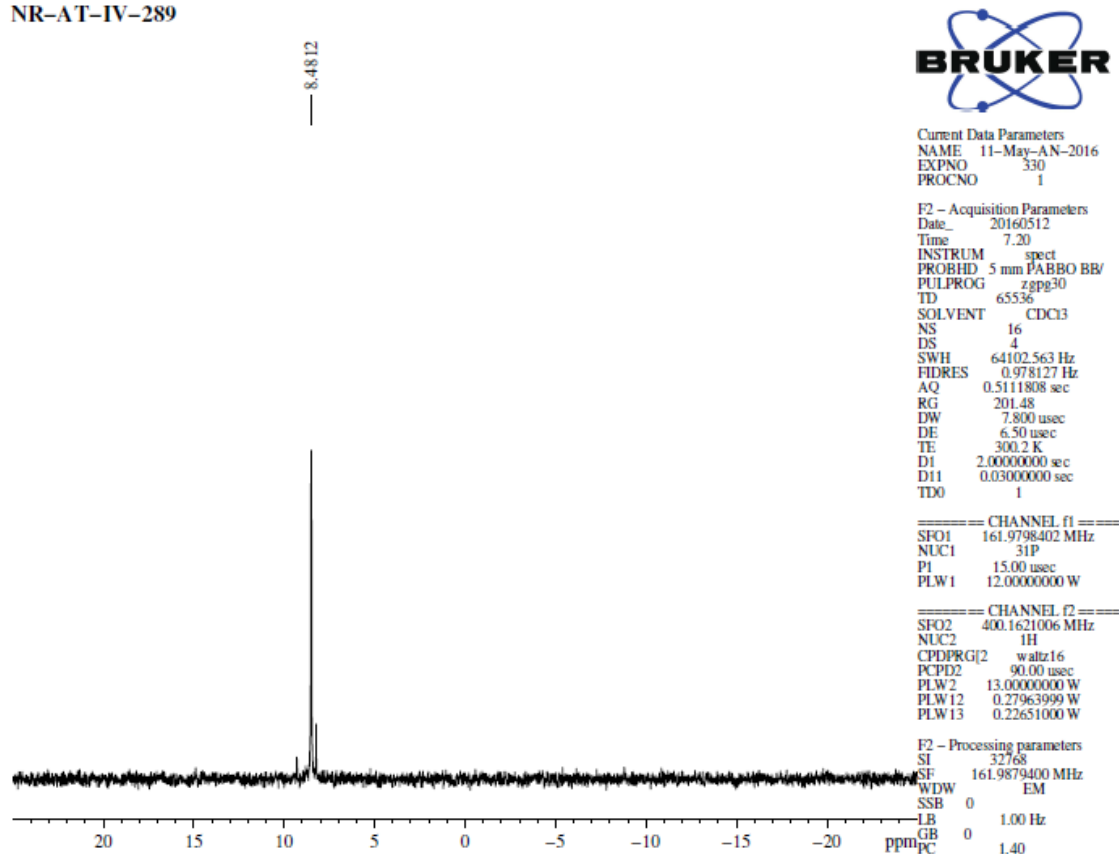

Figure 36:  $^{31}\text{P}$  NMR spectrum of 3l

NRAT-IV-271

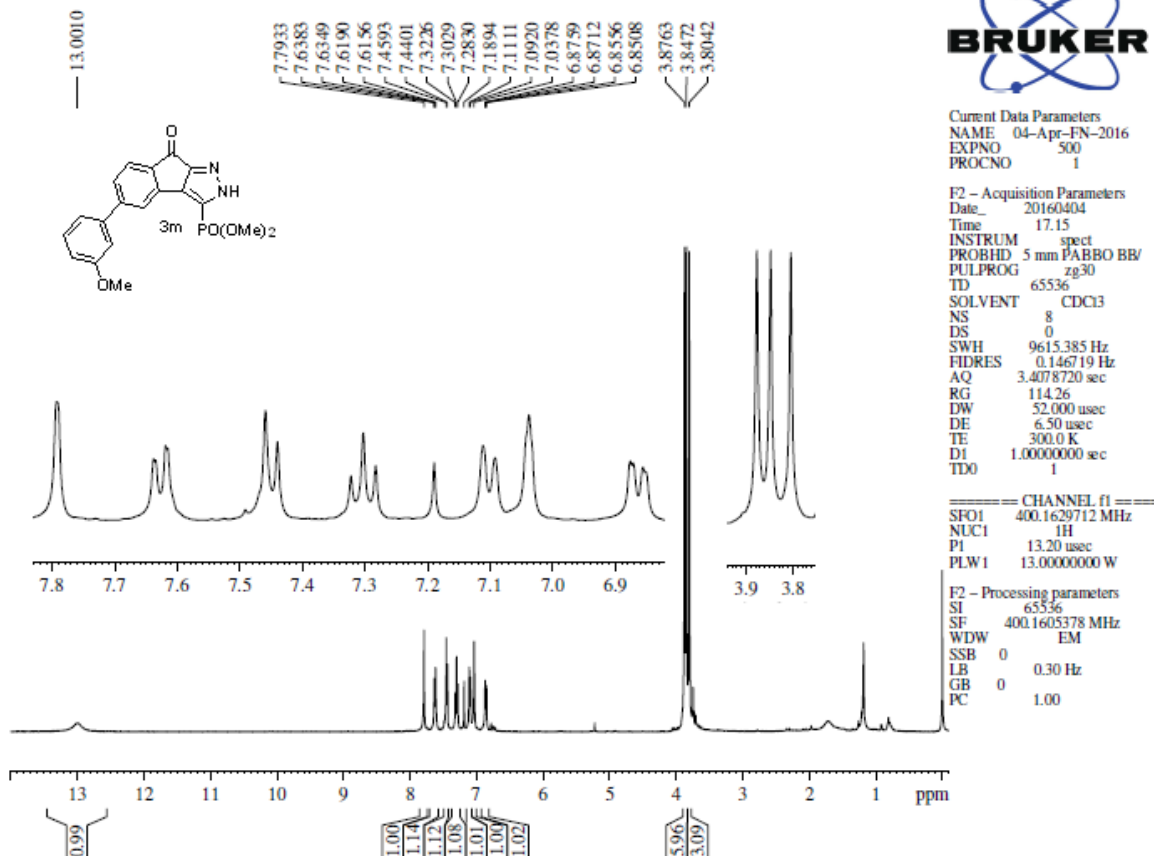

Figure 37: <sup>1</sup>H NMR spectrum of 3m

NR-AT-IV-271

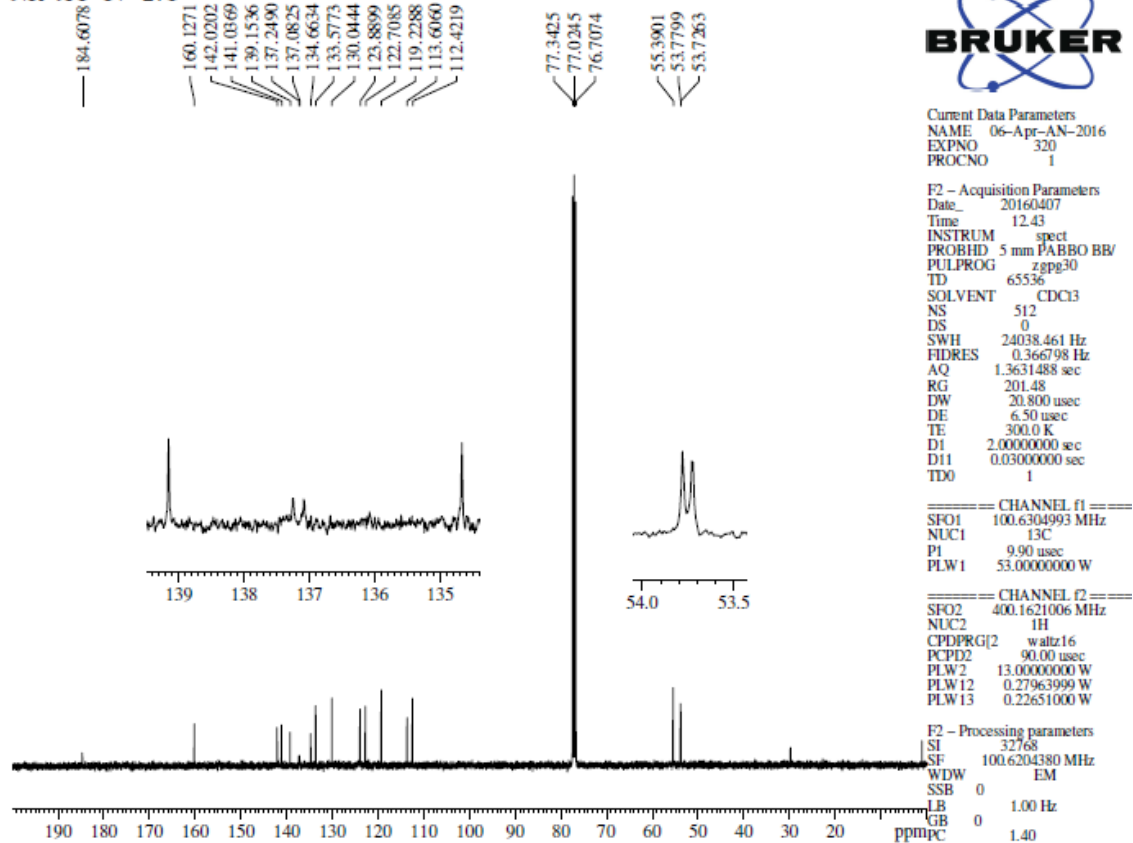

Figure 38: <sup>13</sup>C NMR spectrum of 3m

NRAT-IV-271

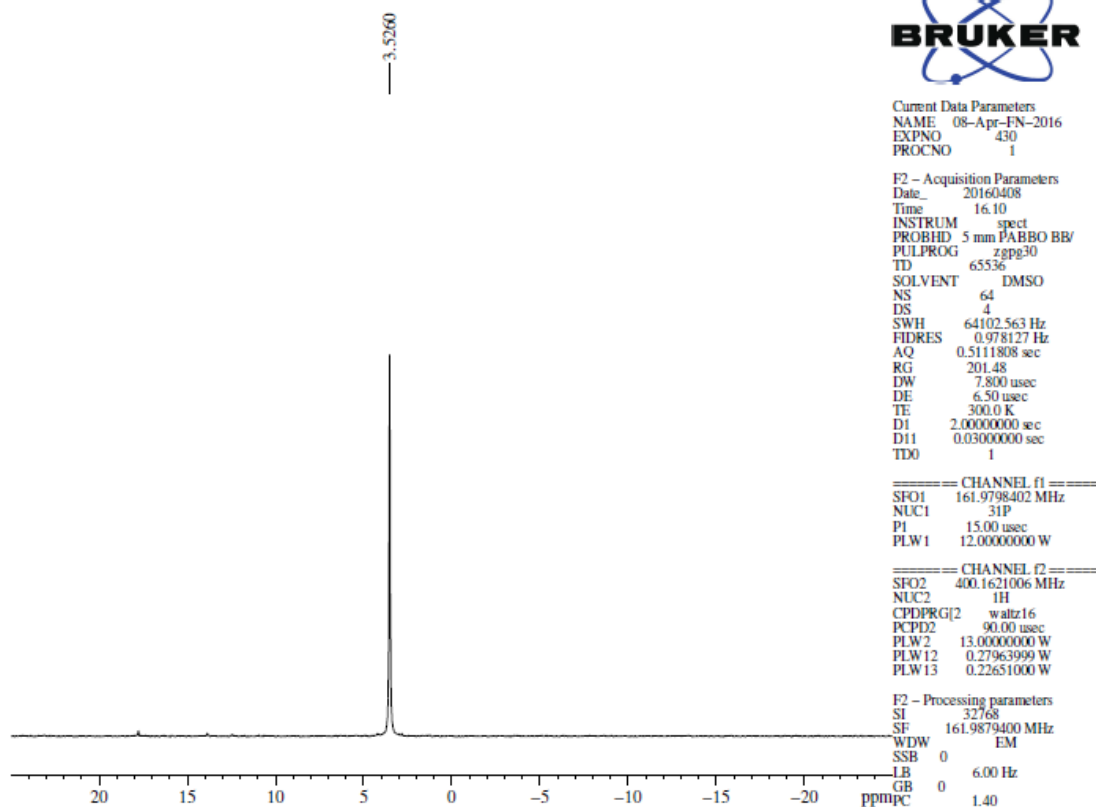Figure 39:  $^{31}\text{P}$  NMR spectrum of 3m

NRAT-IV-252

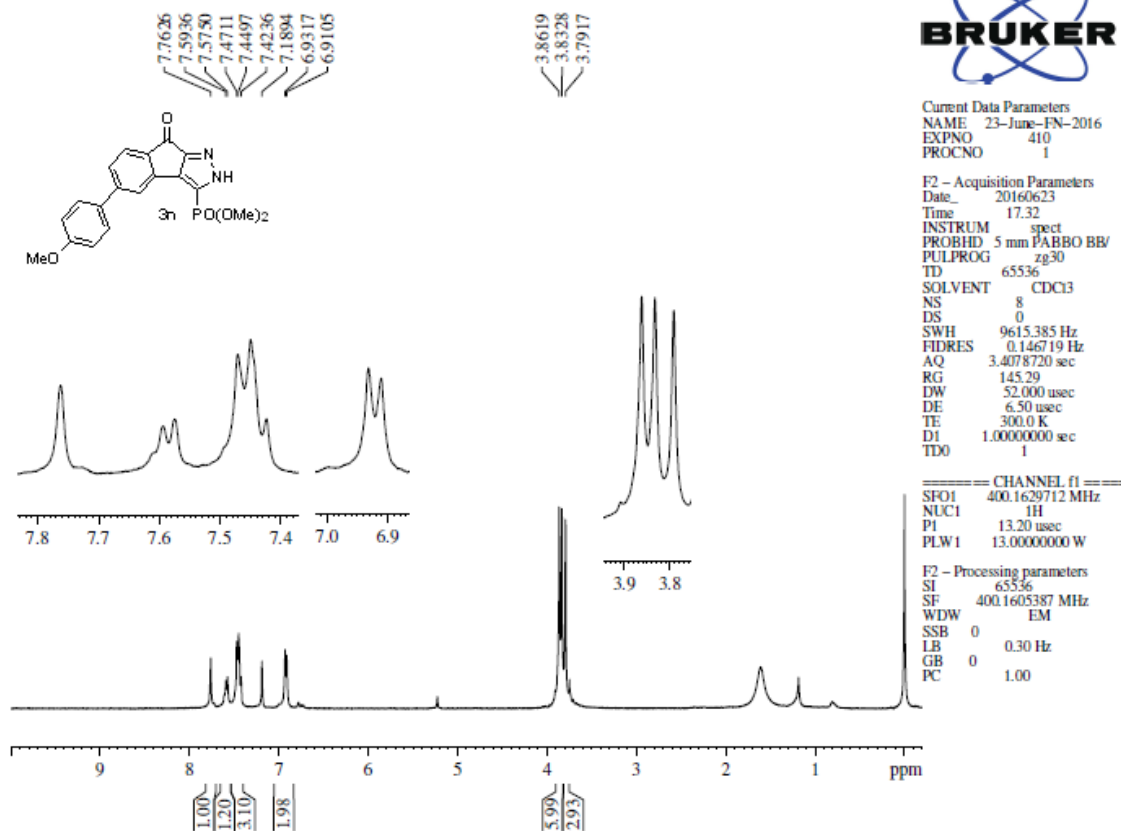Figure 40:  $^1\text{H}$  NMR spectrum of 3n

NRAT-IV-252

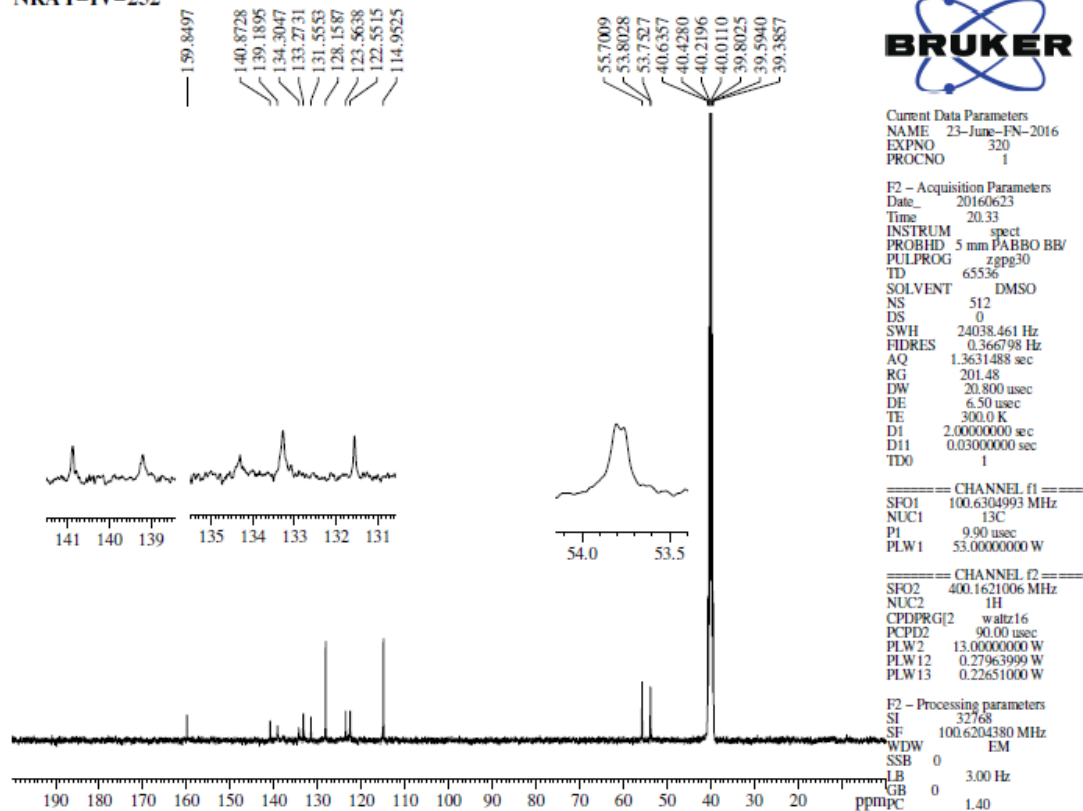Figure 41:  $^{13}\text{C}$  NMR spectrum of 3n

NR-AT-IV-252

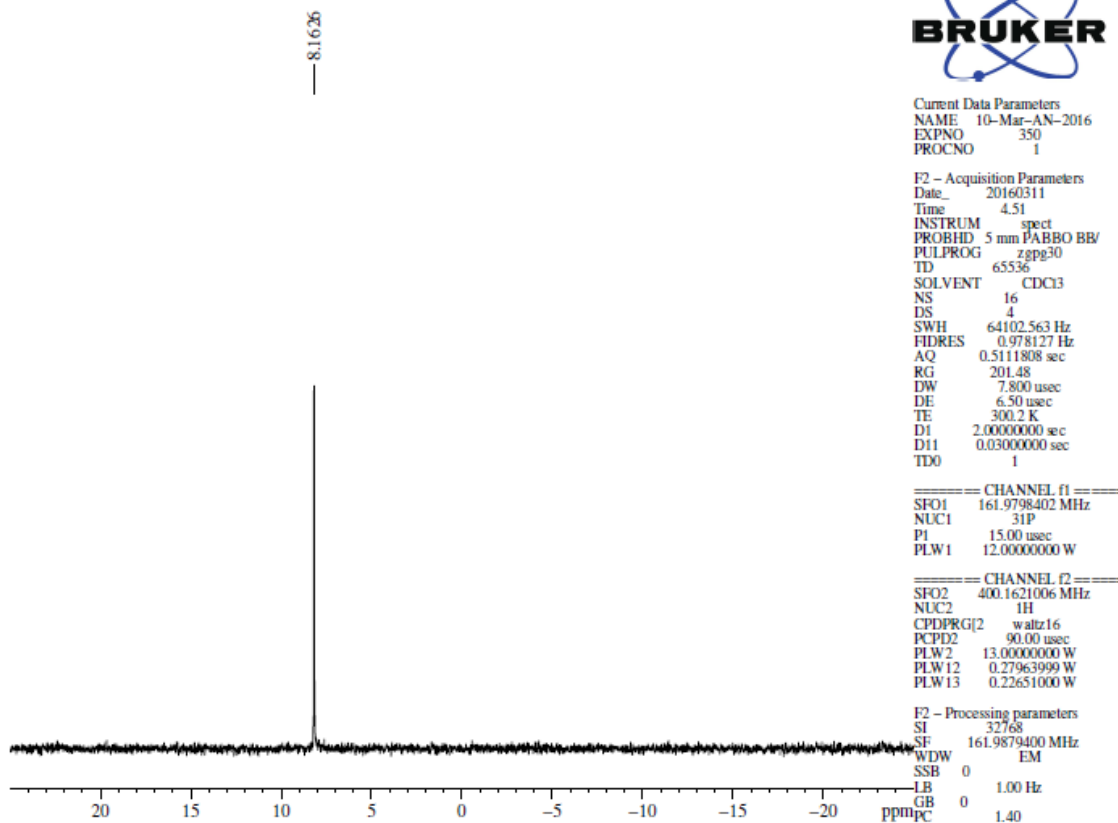Figure 42:  $^{31}\text{P}$  NMR spectrum of 3n



NRAT-IV-232

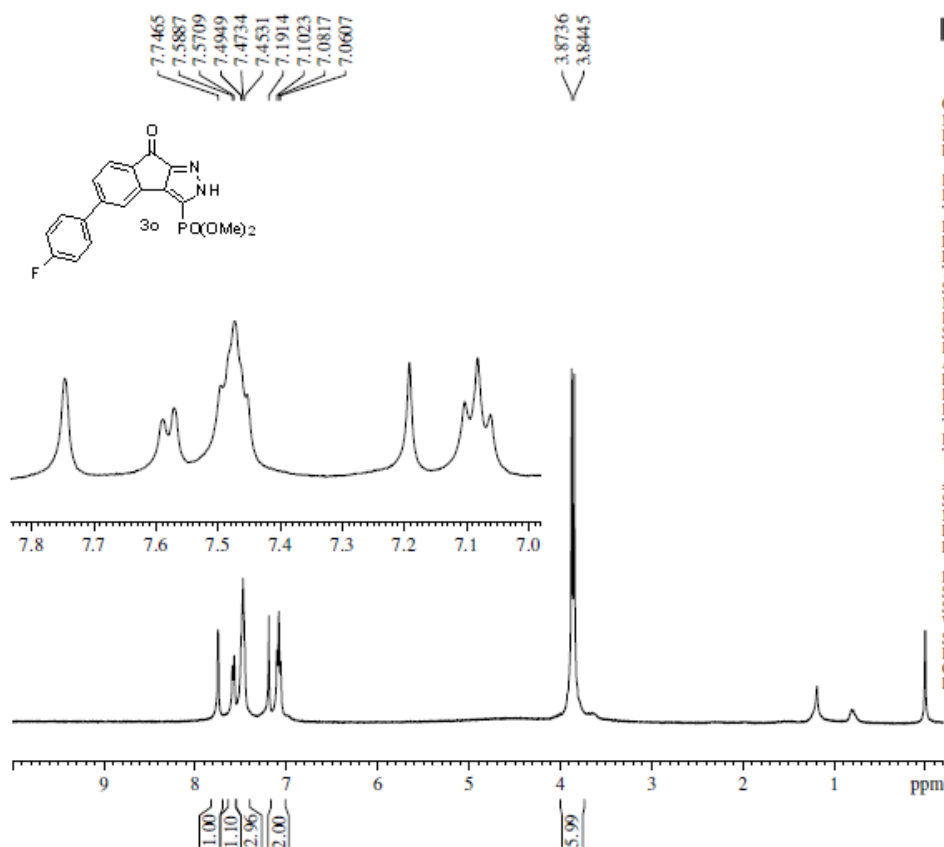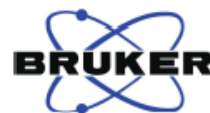

Current Data Parameters  
 NAME 17-Feb-FN-2016  
 EXPNO 360  
 PROCNO 1

F2 - Acquisition Parameters  
 Date\_ 20160217  
 Time 17.03  
 INSTRUM spect  
 PROBHD 5 mm PABBO BB/  
 PULPROG zg30  
 TD 65536  
 SOLVENT CDCl3  
 NS 8  
 DS 0  
 SWH 9615.385 Hz  
 FIDRES 0.146719 Hz  
 AQ 3.4078720 sec  
 RG 159.22  
 DW 52.000 usec  
 DE 6.50 usec  
 TE 300.0 K  
 D1 1.0000000 sec  
 TD0 1

===== CHANNEL f1 =====  
 SFO1 400.1629712 MHz  
 NUC1 1H  
 P1 13.20 usec  
 PLW1 13.0000000 W

F2 - Processing parameters  
 SI 65536  
 SF 400.1605375 MHz  
 WDW EM  
 SSB 0  
 LB 0.30 Hz  
 GB 0  
 PC 1.00

Figure 43: <sup>1</sup>H NMR spectrum of **3o**

NRAT-IV-232

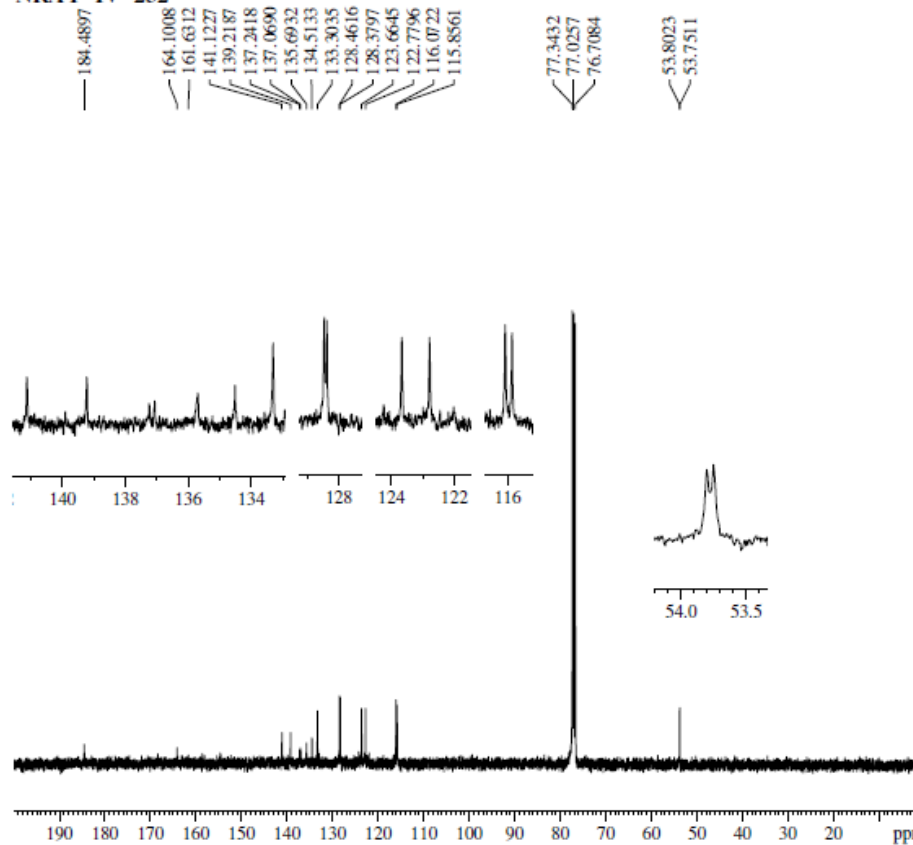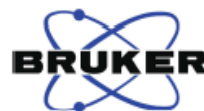

Current Data Parameters  
 NAME 17-Feb-FN-2016  
 EXPNO 310  
 PROCNO 1

F2 - Acquisition Parameters  
 Date\_ 20160217  
 Time 21.09  
 INSTRUM spect  
 PROBHD 5 mm PABBO BB/  
 PULPROG zgpg30  
 TD 65536  
 SOLVENT CDCl3  
 NS 512  
 DS 0  
 SWH 24038.461 Hz  
 FIDRES 0.366798 Hz  
 AQ 1.3631488 sec  
 RG 1.3631488 sec  
 DW 20.800 usec  
 DE 6.50 usec  
 TE 300.0 K  
 D1 2.0000000 sec  
 D11 0.0300000 sec  
 TD0 1

===== CHANNEL f1 =====  
 SFO1 100.6304993 MHz  
 NUC1 13C  
 P1 9.90 usec  
 PLW1 53.0000000 W

===== CHANNEL f2 =====  
 SFO2 400.1621006 MHz  
 NUC2 1H  
 CPDPRG2 waltz16  
 PCPD2 90.00 usec  
 PLW2 13.0000000 W  
 PLW12 0.27963999 W  
 PLW13 0.22651000 W

F2 - Processing parameters  
 SI 32768  
 SF 100.6204380 MHz  
 WDW EM  
 SSB 0  
 LB 1.00 Hz  
 GB 0  
 PC 1.40

Figure 44: <sup>13</sup>C NMR spectrum of **3o**



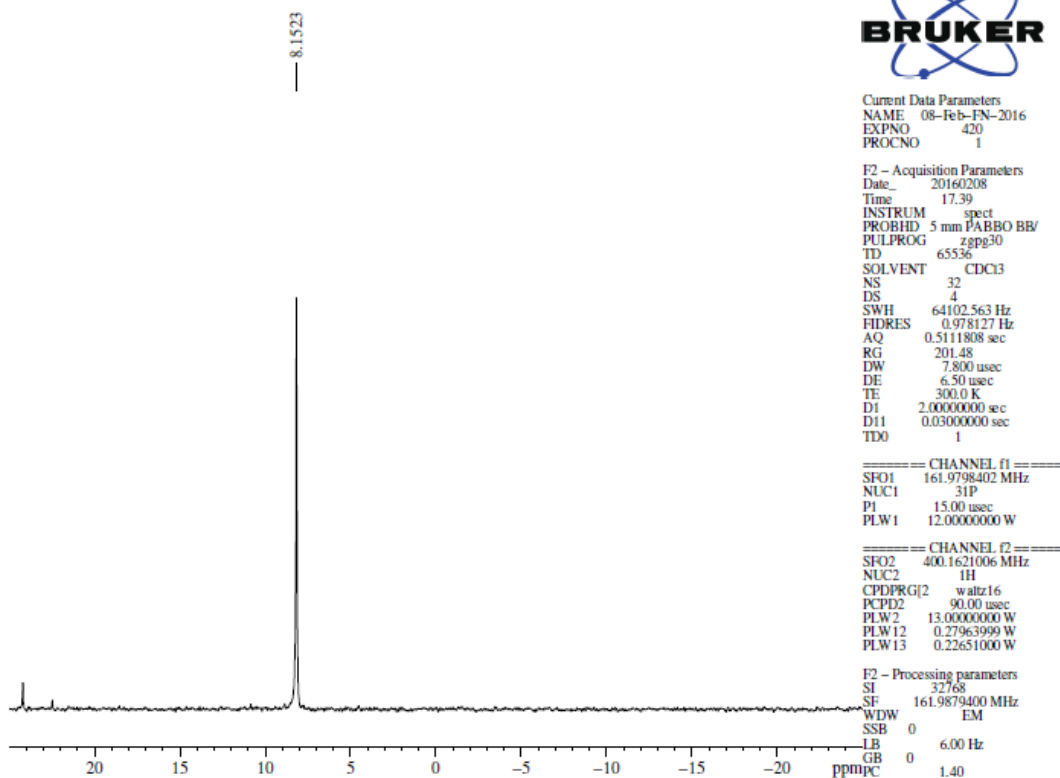

Figure 39:

Figure 45: <sup>31</sup>P NMR spectrum of 3o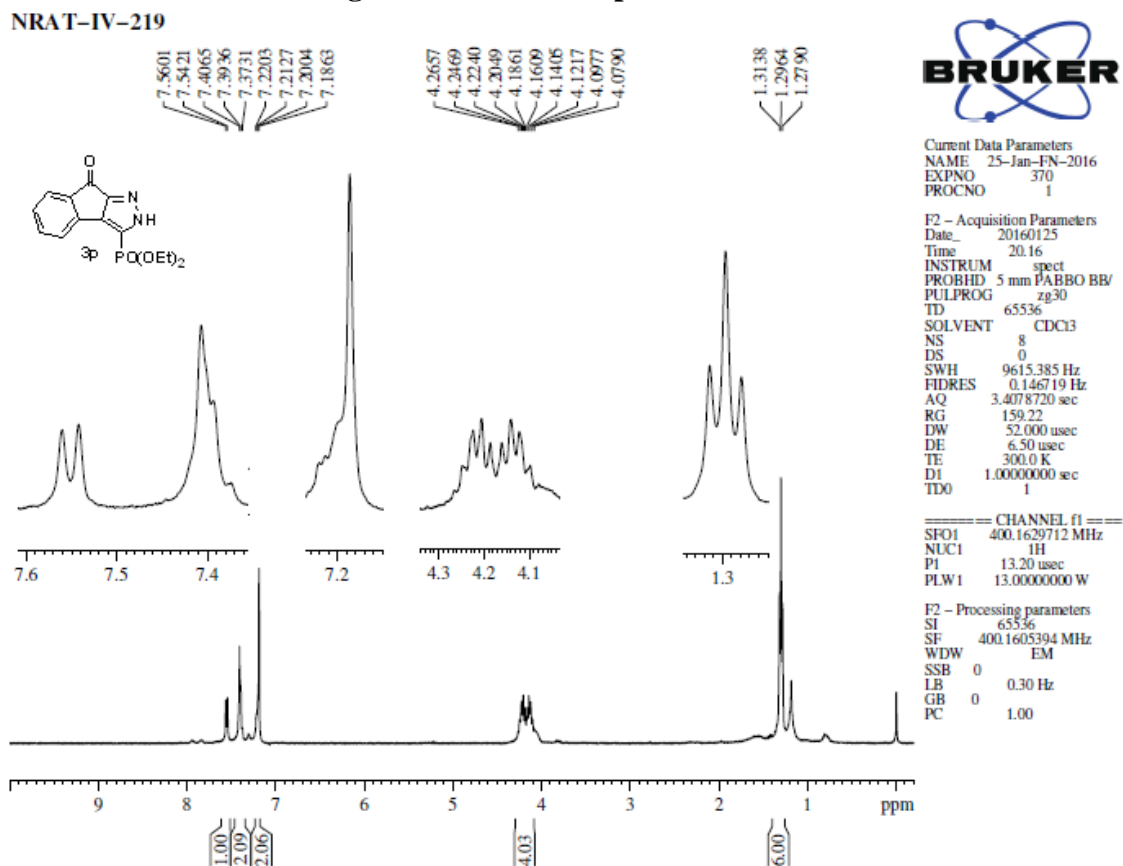Figure 46: <sup>1</sup>H NMR spectrum of 3p

NR-AT-IV-219

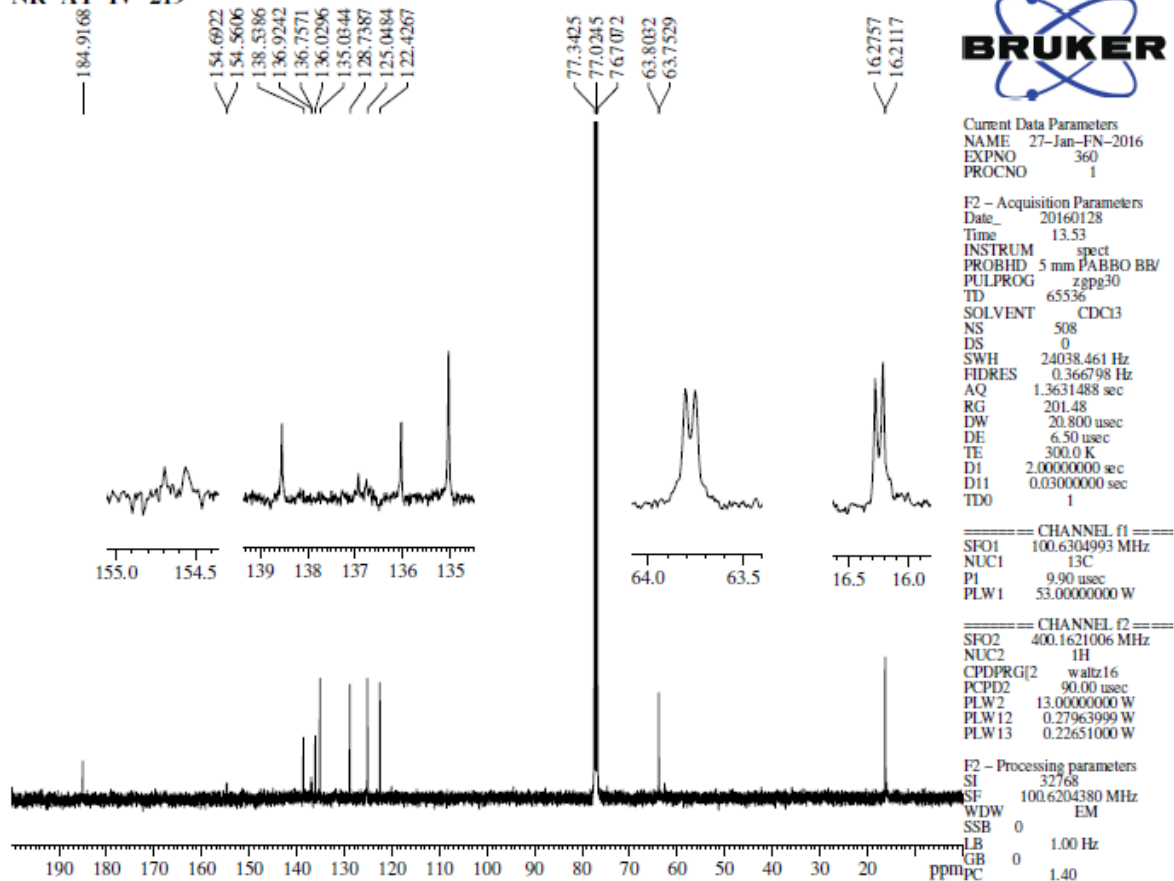

Figure 47:  $^{13}\text{C}$  NMR spectrum of 3p

NRAT-IV-219

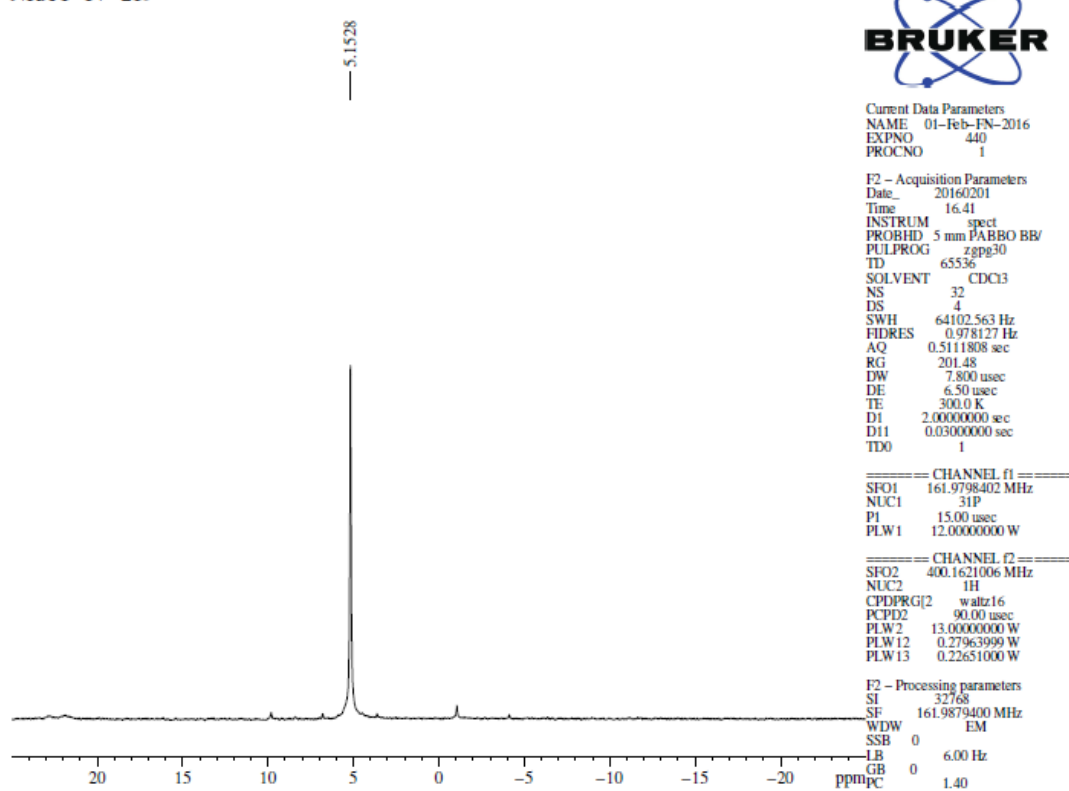

Figure 48:  $^{31}\text{P}$  NMR spectrum of 3p

**NRA T-IV-246**

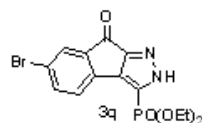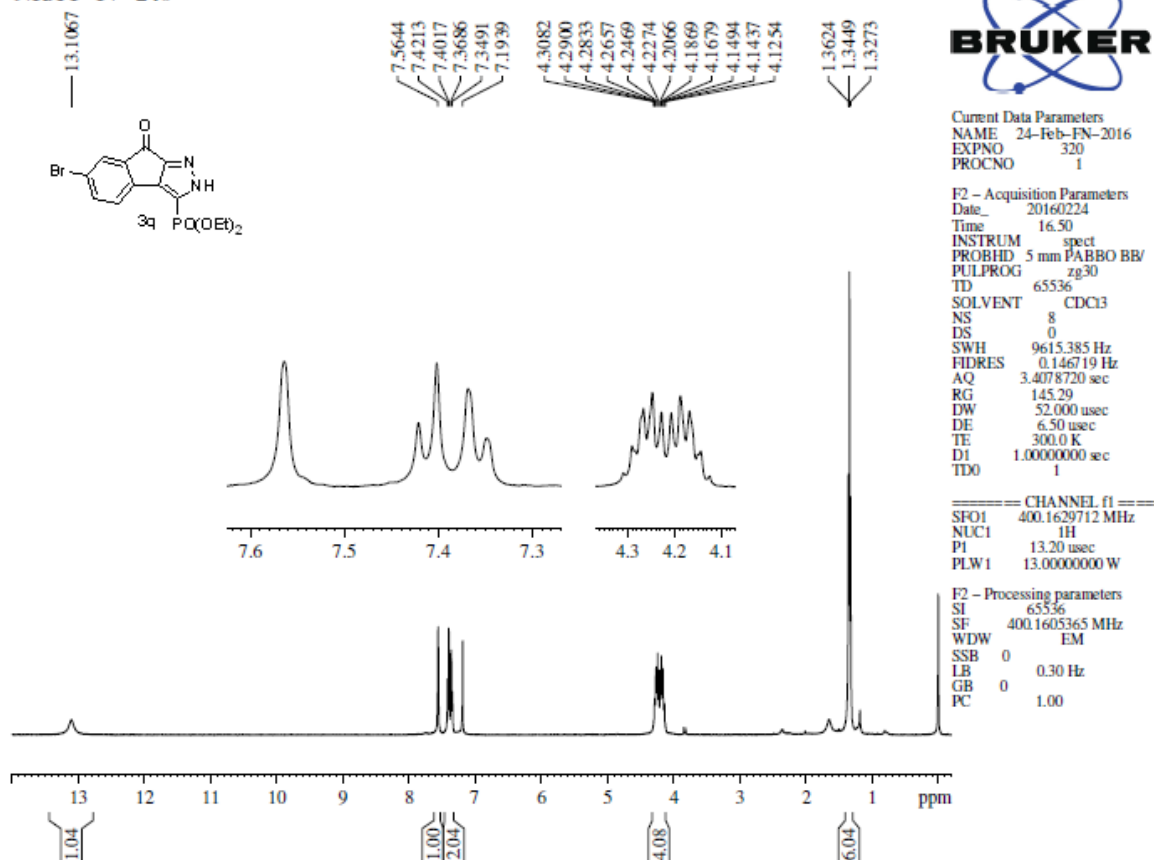

**NRA T-IV-246**

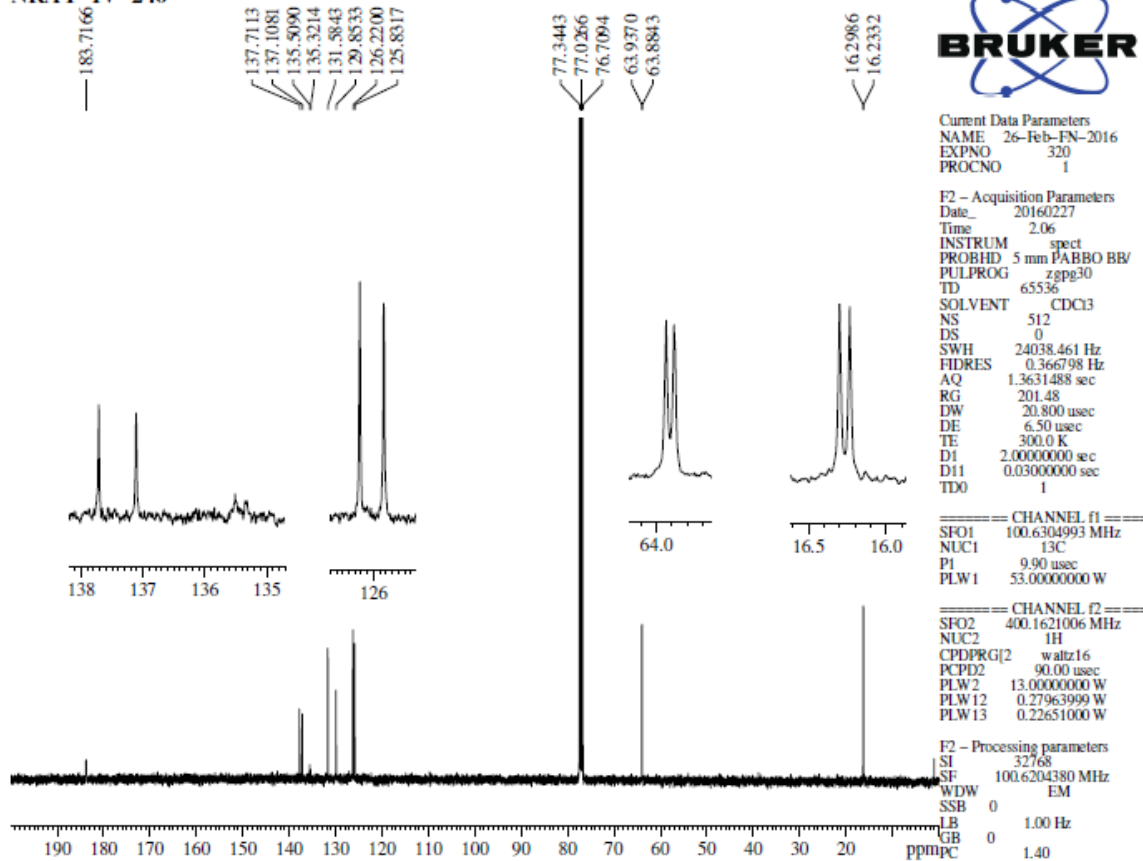

NR-AT-IV-246

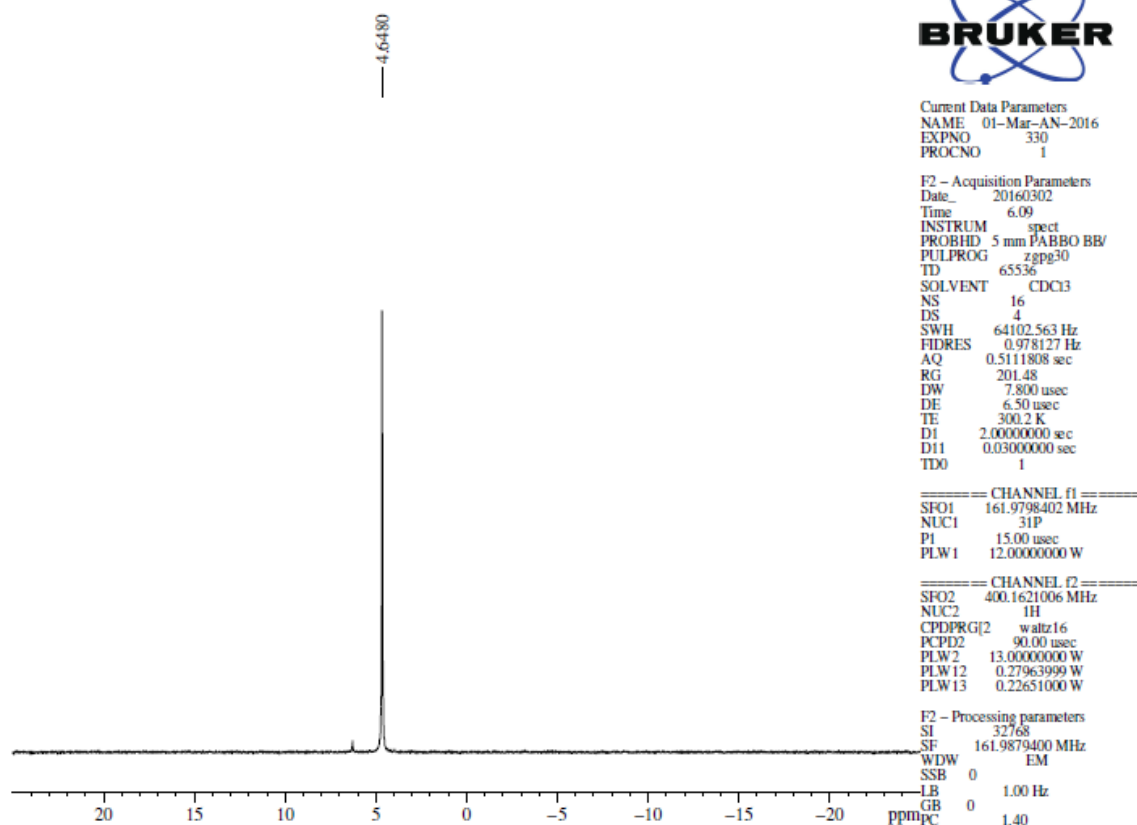Figure 51:  $^{13}\text{P}$  NMR spectrum of 3q

NRAT-V-12

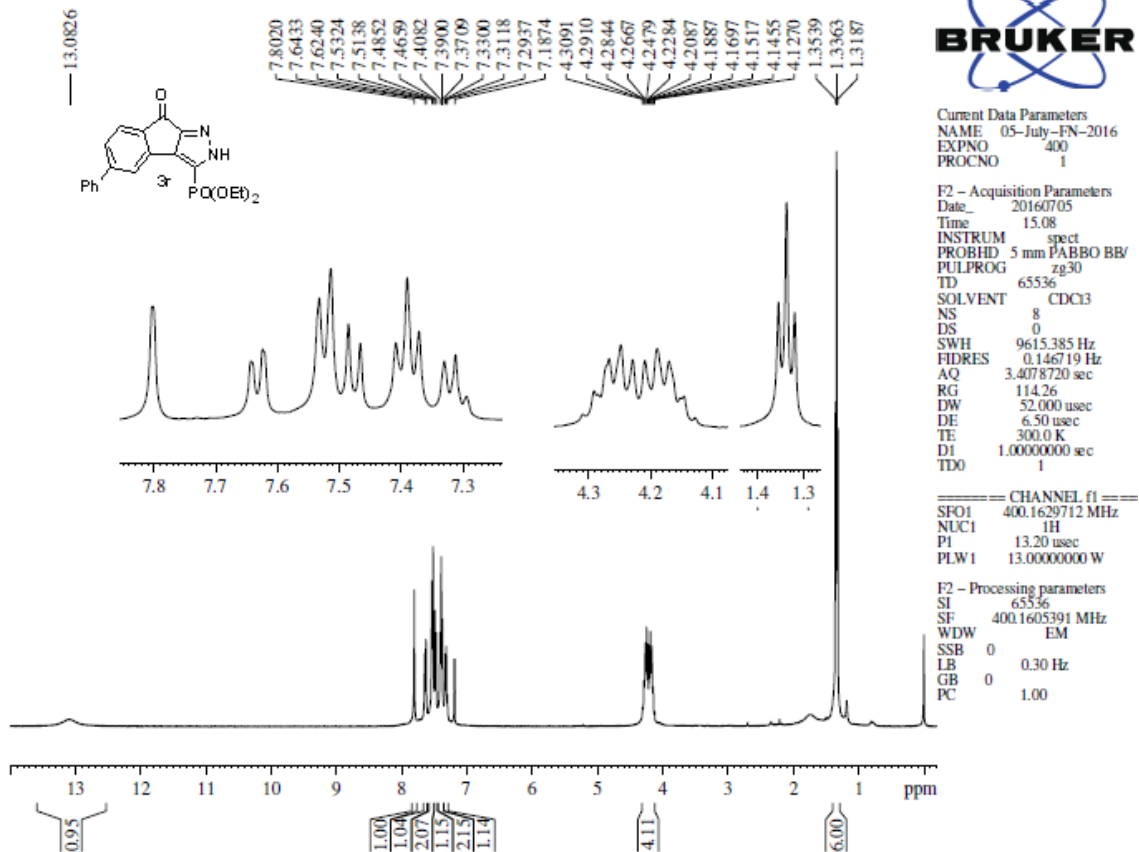

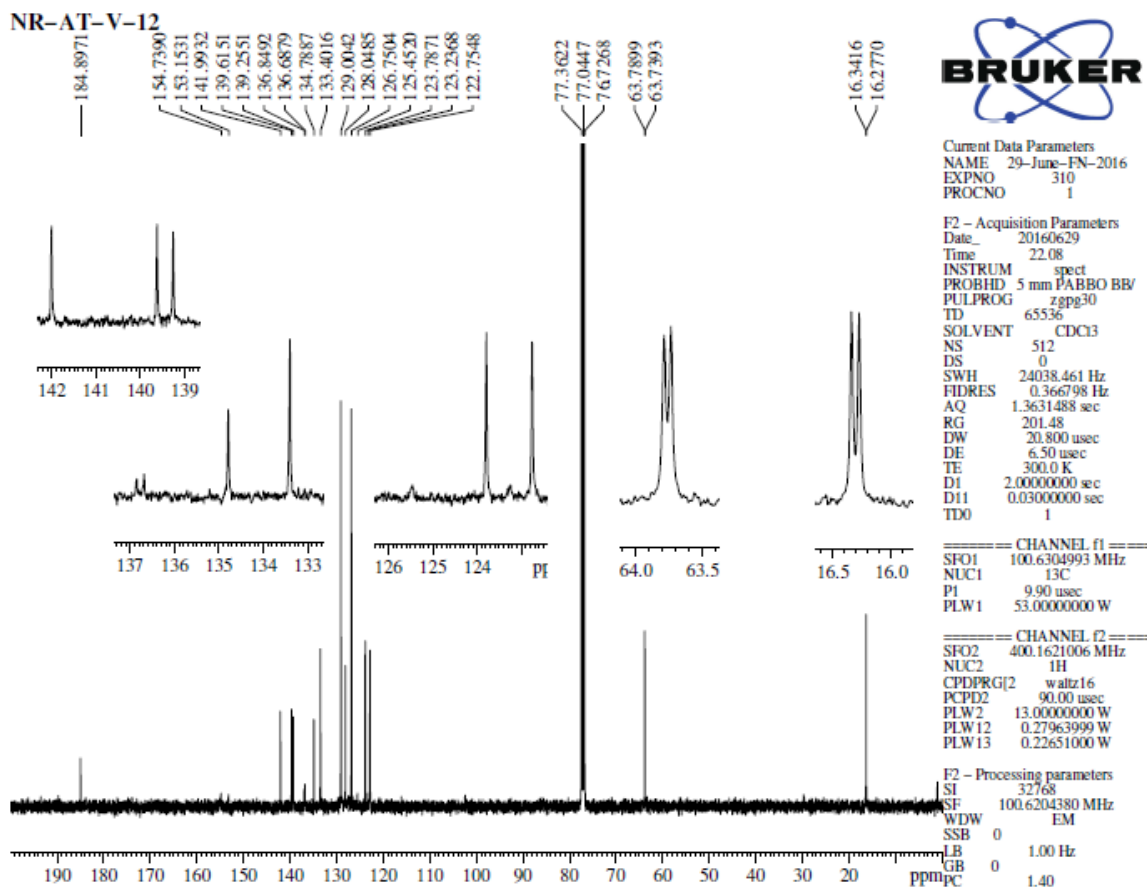

Figure 53:  $^{13}\text{C}$  NMR spectrum of 3r

NRAT-V-12

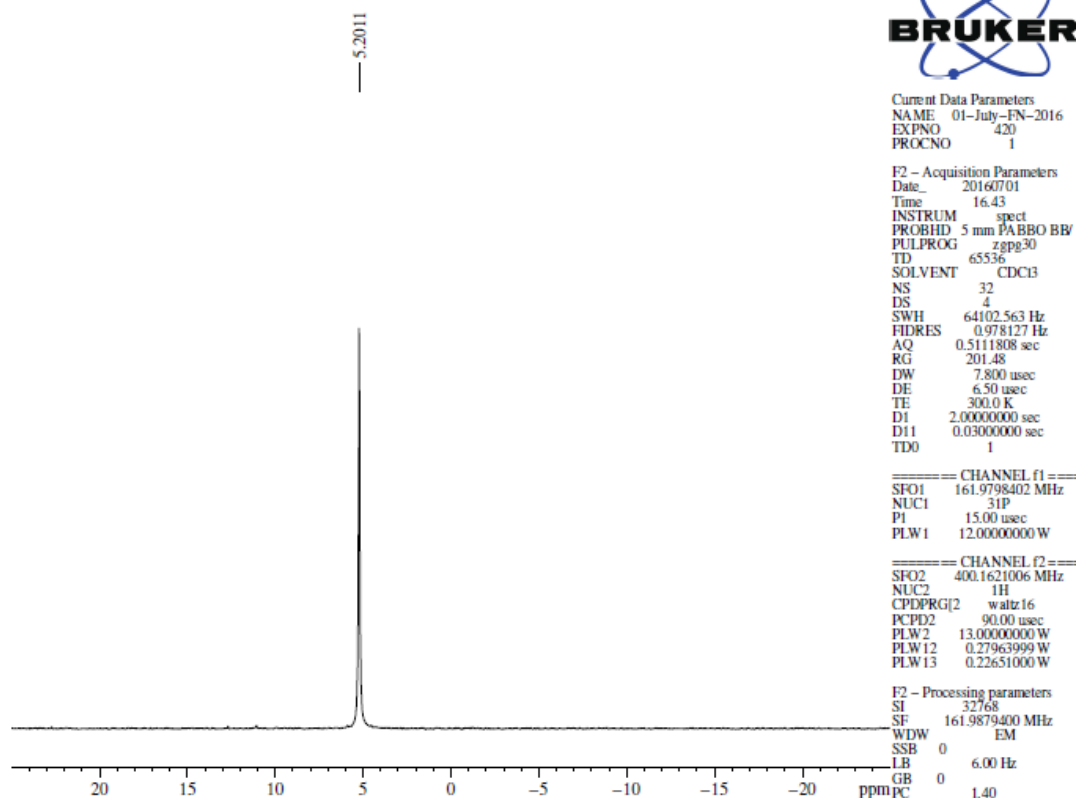

Figure 54:  $^{31}\text{P}$  NMR spectrum of 3r

NRAT-IV-250

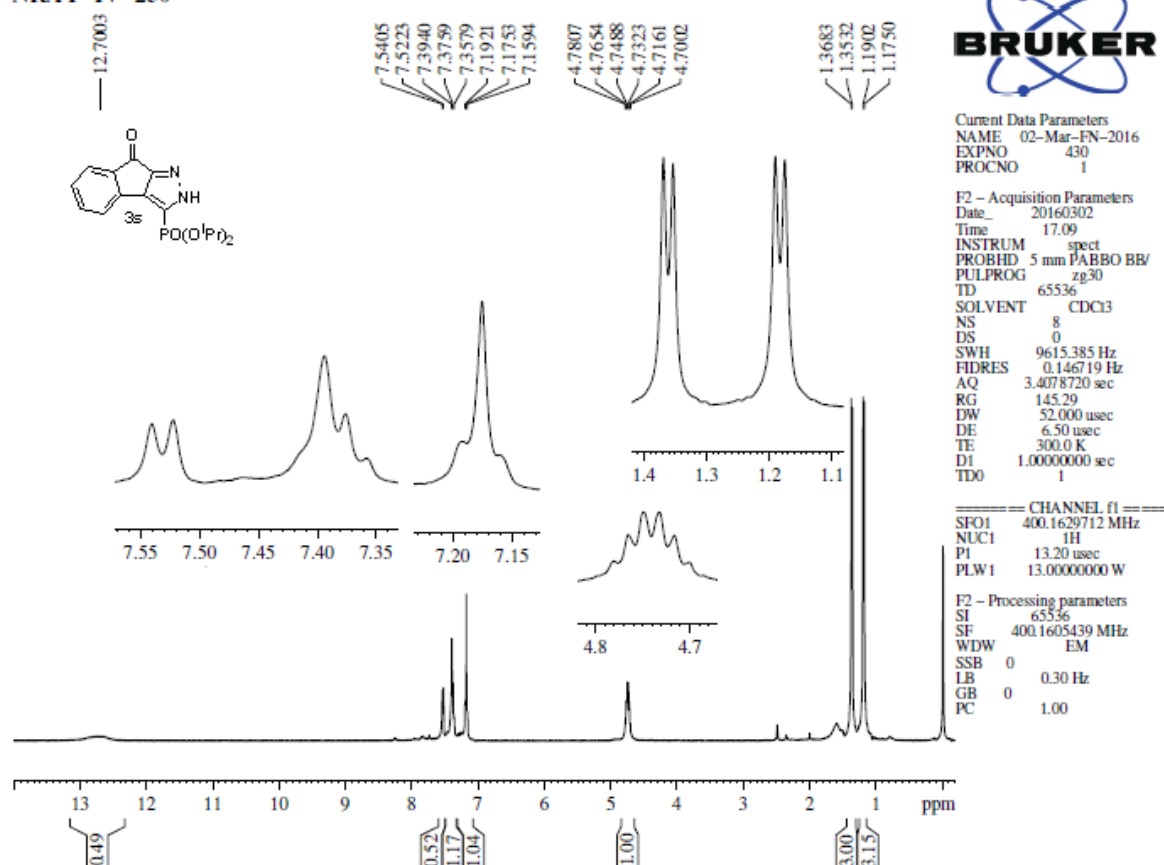

Figure 55: <sup>1</sup>H NMR spectrum of 3s

NR-AT-IV-250

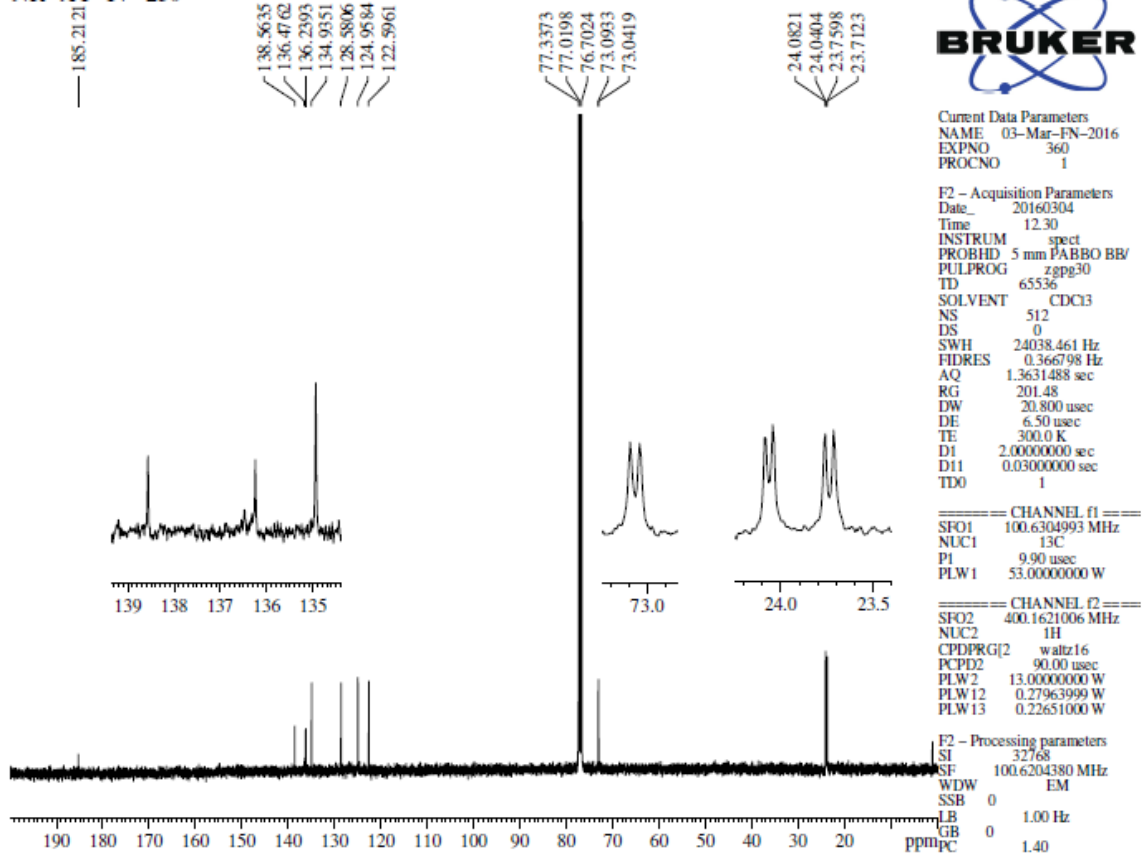

Figure 56: <sup>13</sup>C NMR spectrum of 3s

NR-AT-IV-250

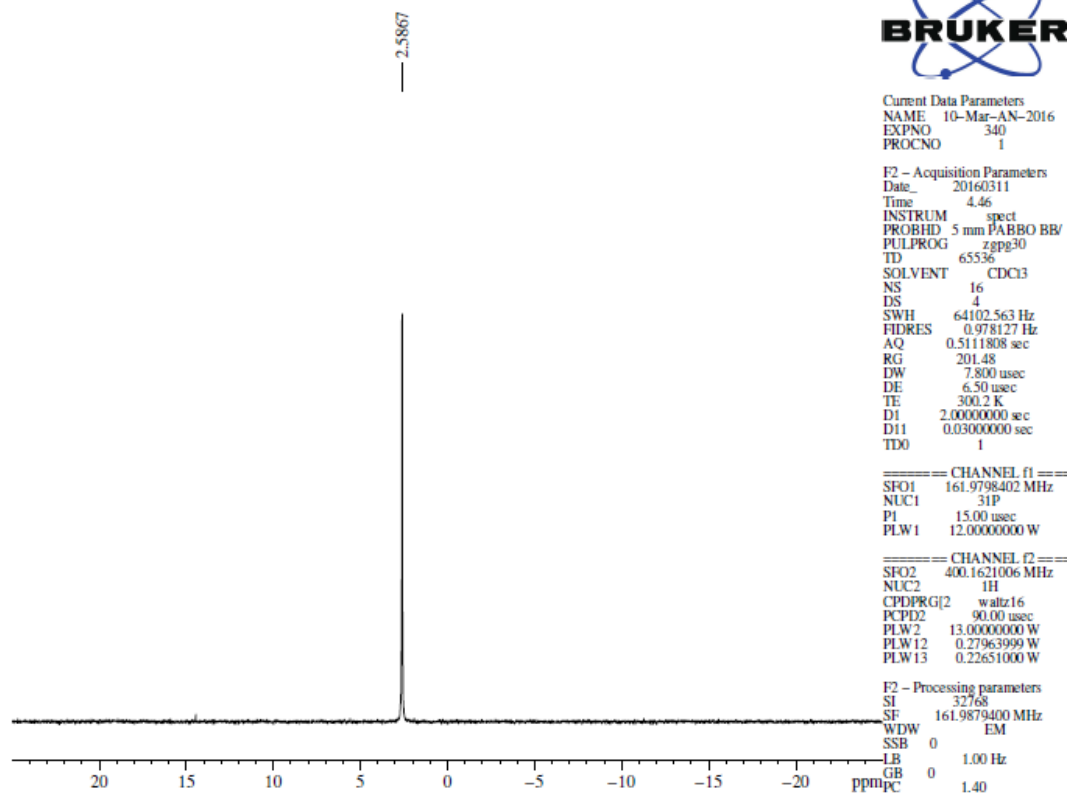

Figure 57: <sup>31</sup>P NMR spectrum of 3s

NRAT-IV-290

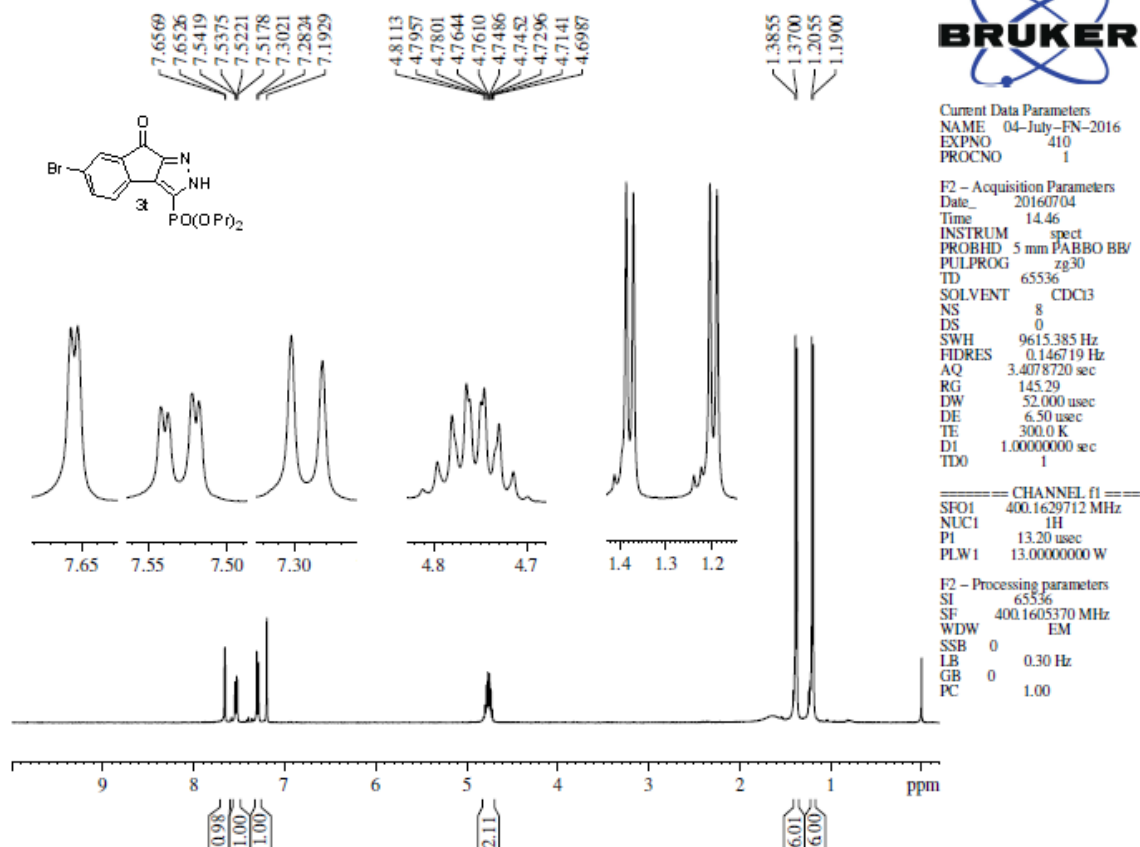

Figure 58: <sup>1</sup>H NMR spectrum of 3t



NRAT-IV-290

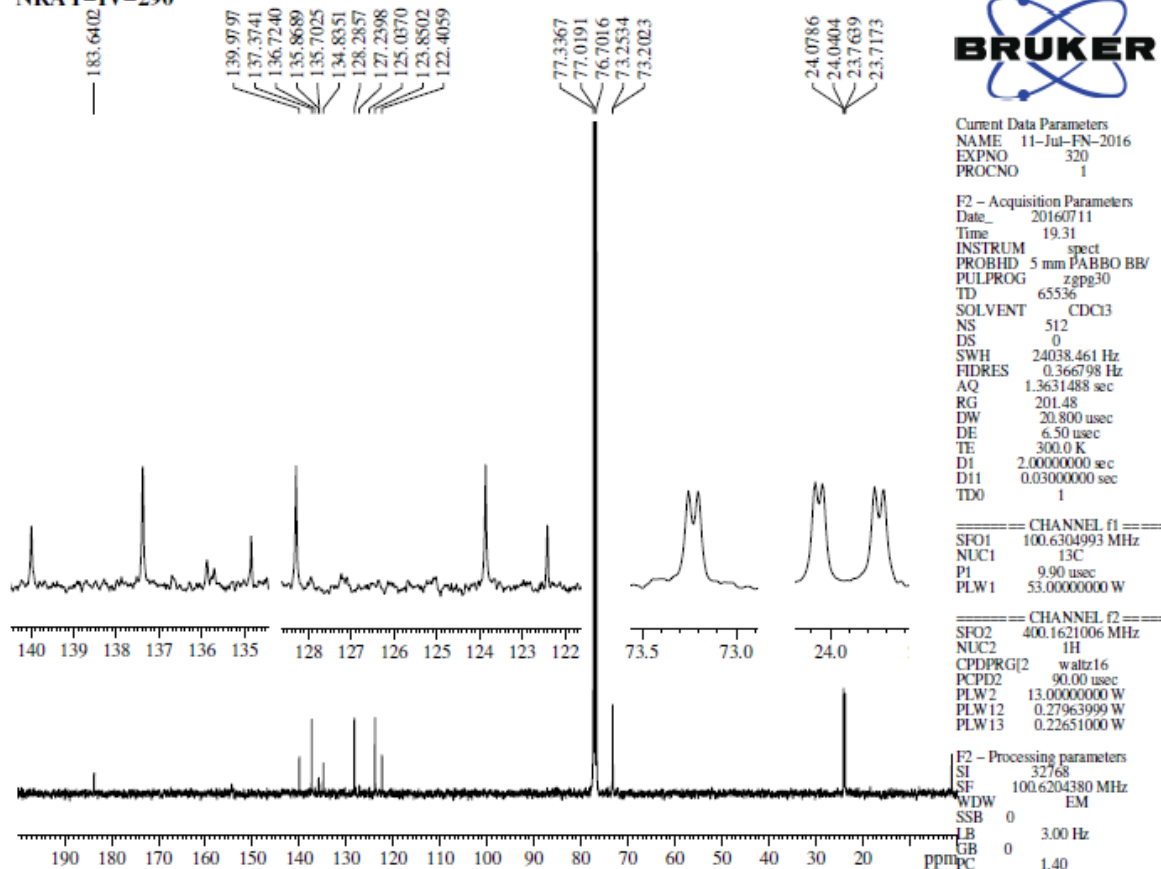

Figure 59:  $^{13}\text{C}$  NMR spectrum of 3t

NRAT IV 290

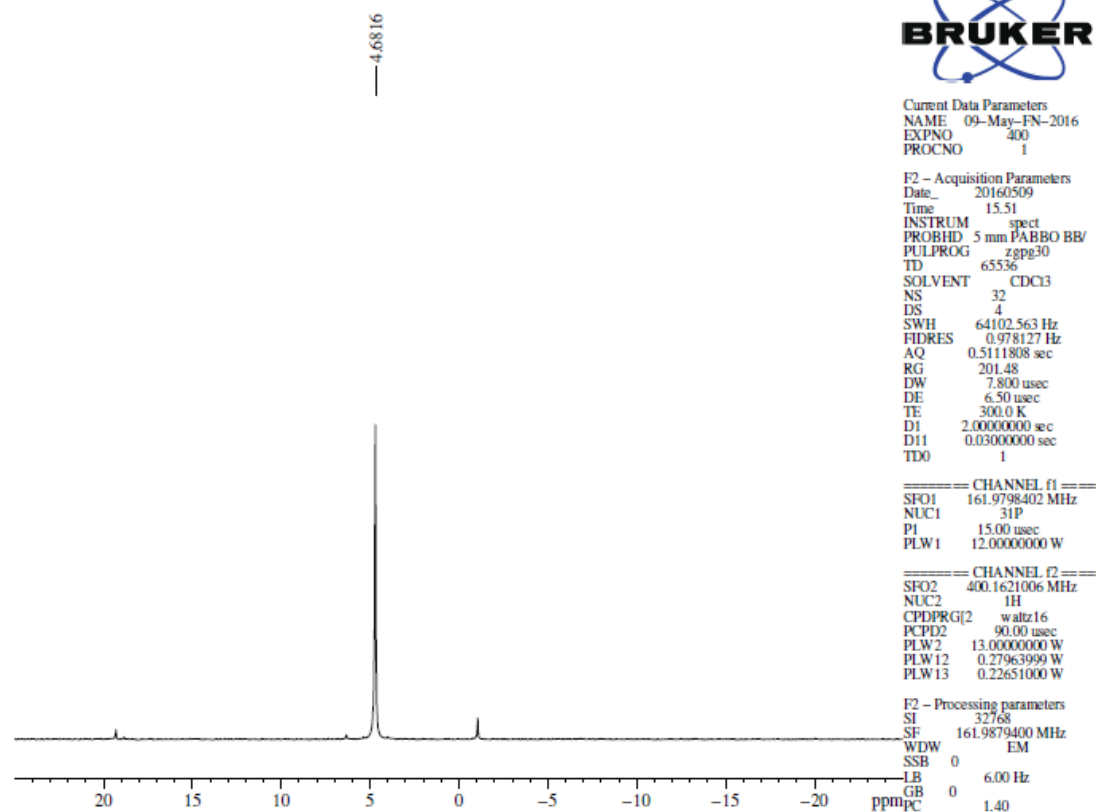

Figure 60:  $^{31}\text{P}$  NMR spectrum of 3t



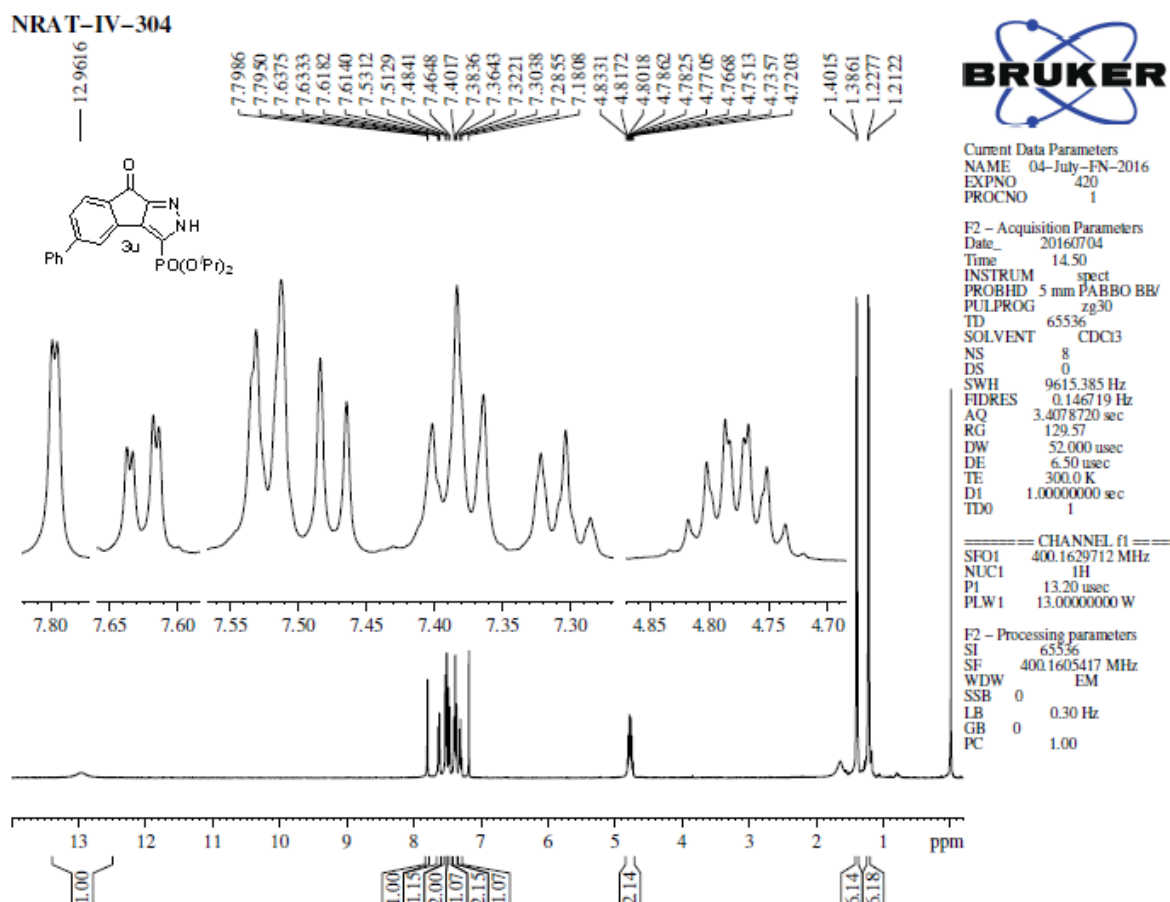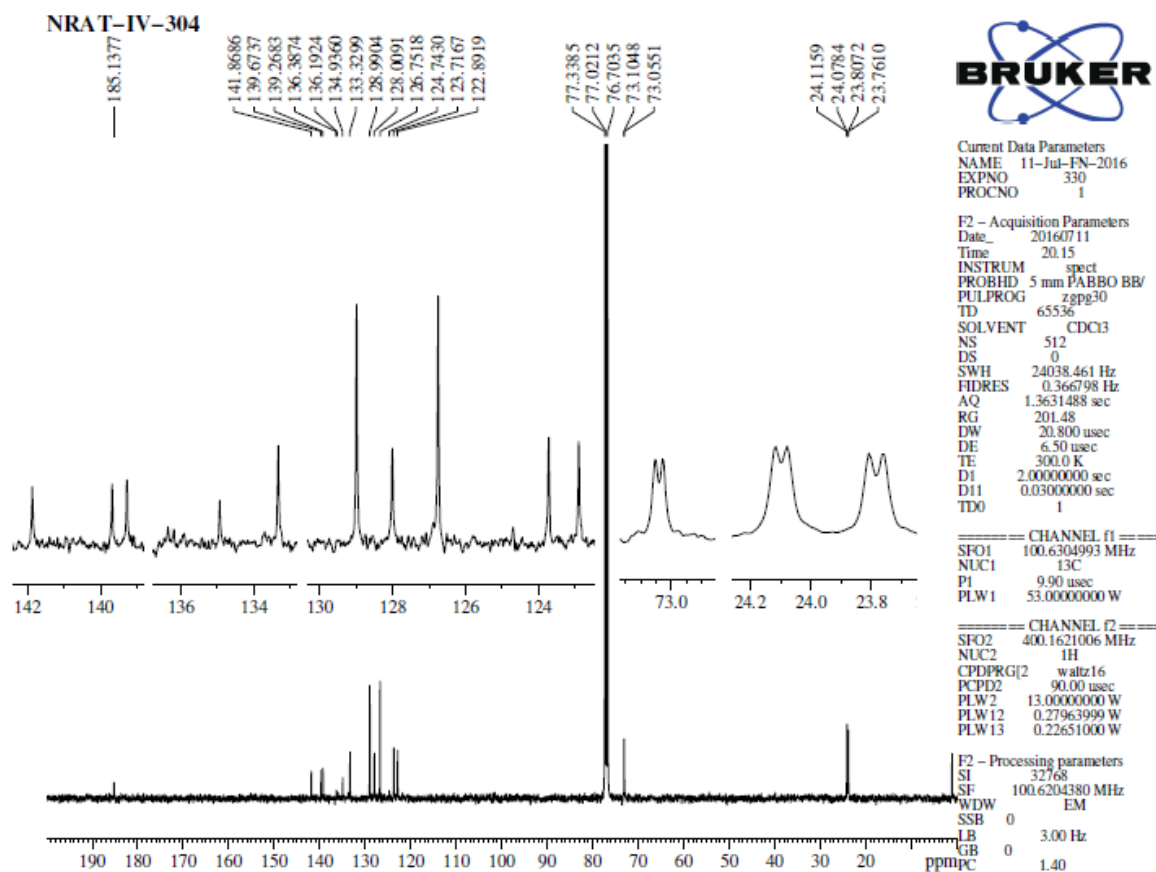

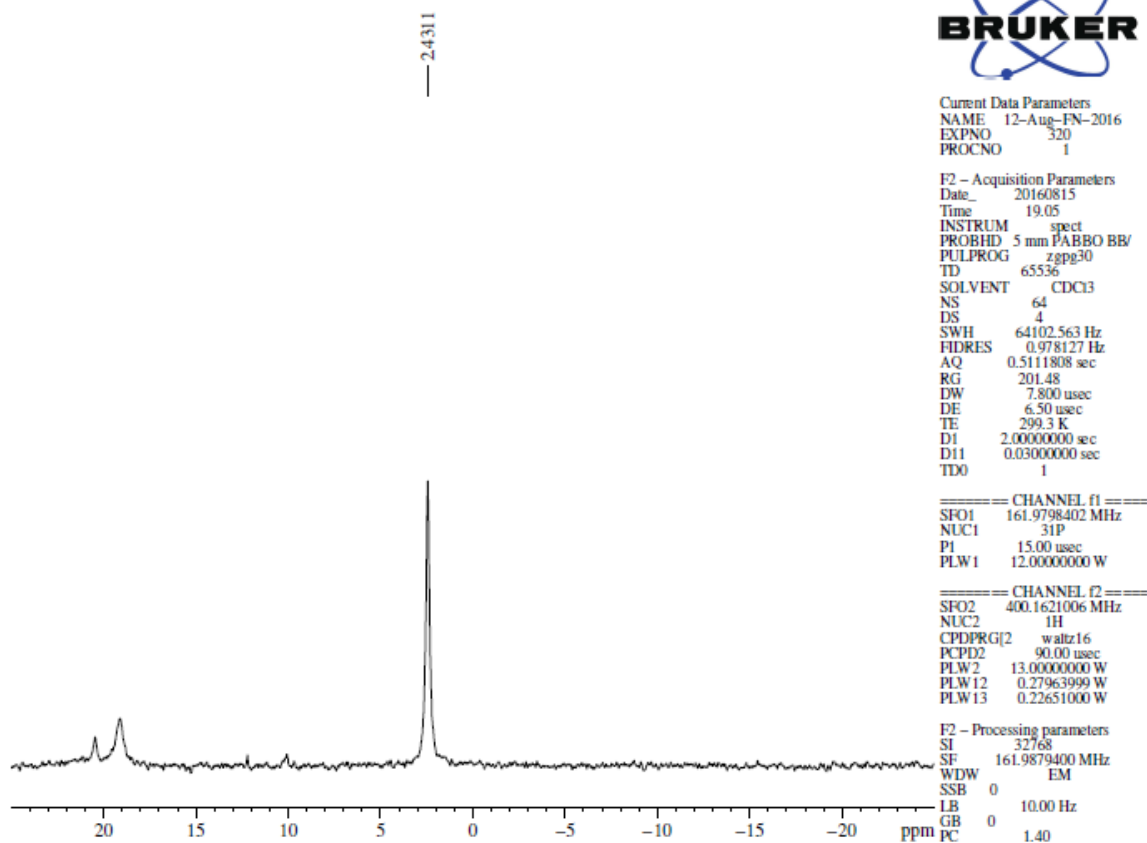Figure 63:  $^{31}\text{P}$  NMR spectrum of 3u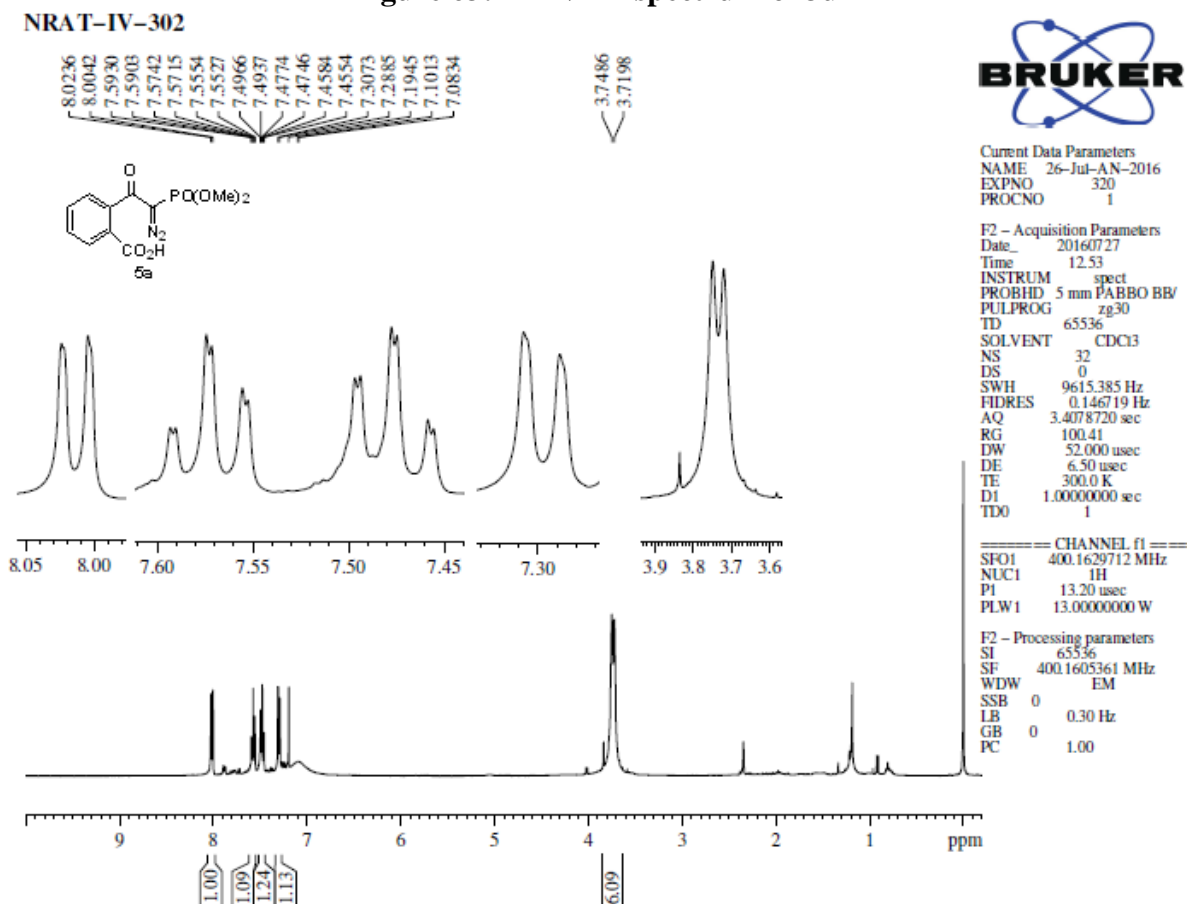Figure 64:  $^1\text{H}$  NMR spectrum of 5a

NR-AT-IV-302

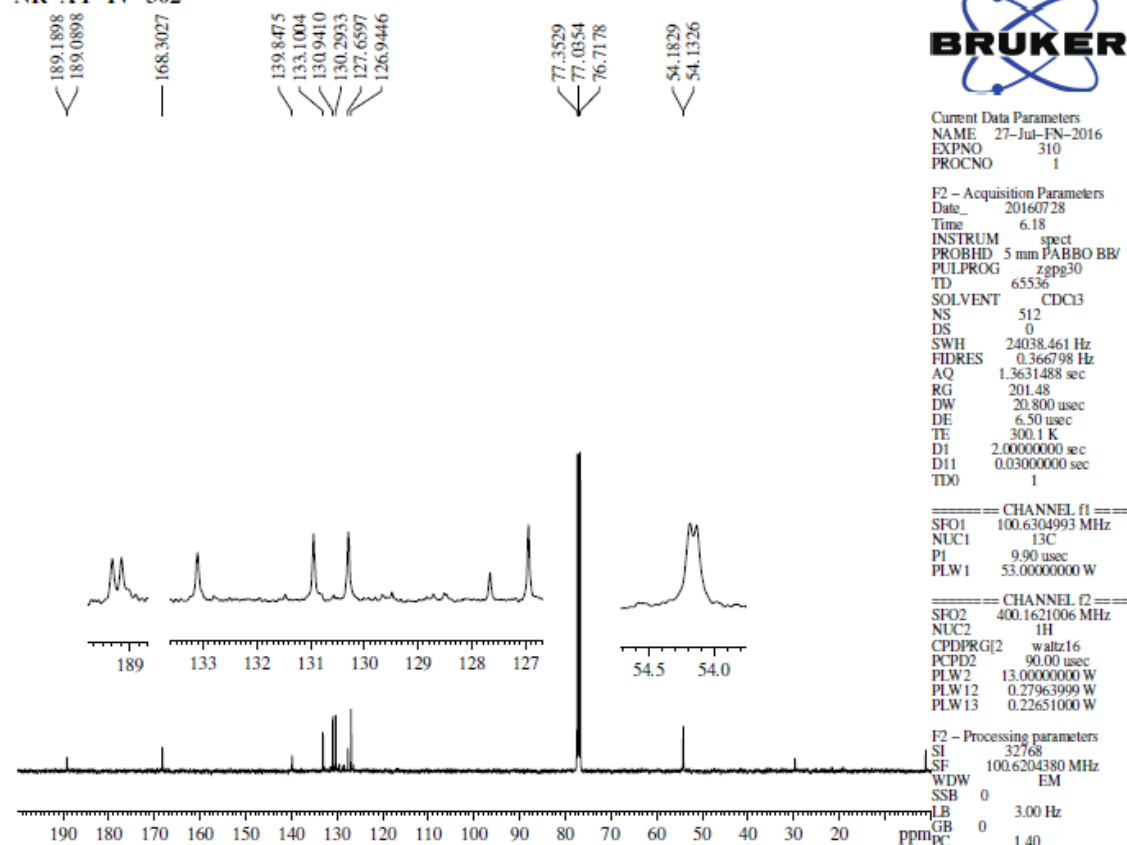

Figure 65: <sup>13</sup>C NMR spectrum of 5a

NRAT-IV-302

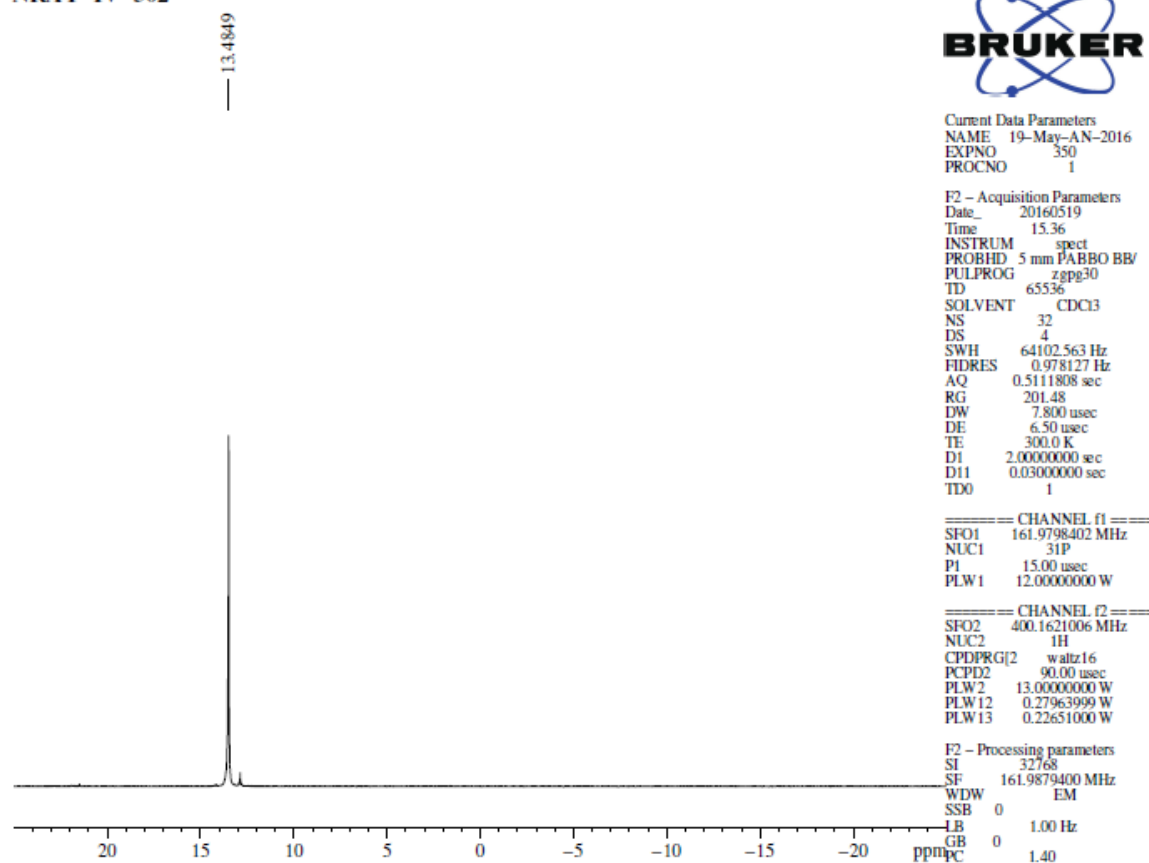

Figure 66: <sup>31</sup>P NMR spectrum of 5a

NR-AT-IV-272

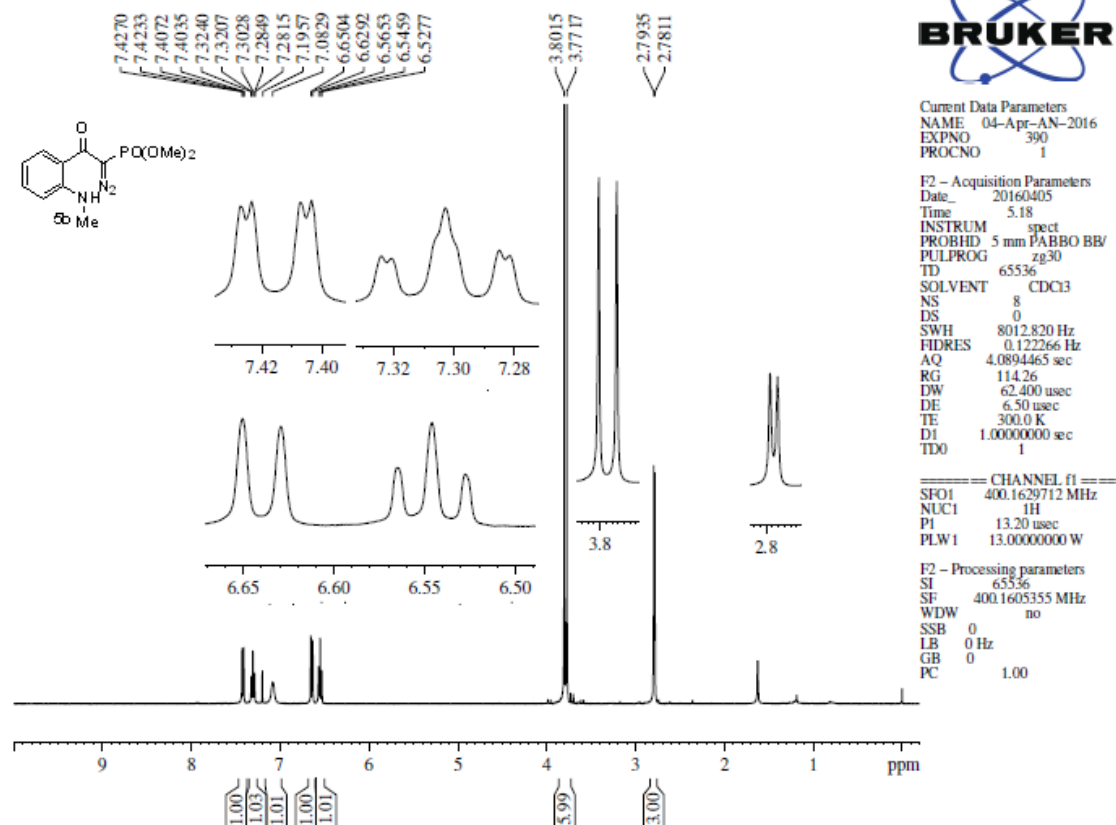Figure 67: <sup>1</sup>H NMR spectrum of 5b

NRAT-IV-272

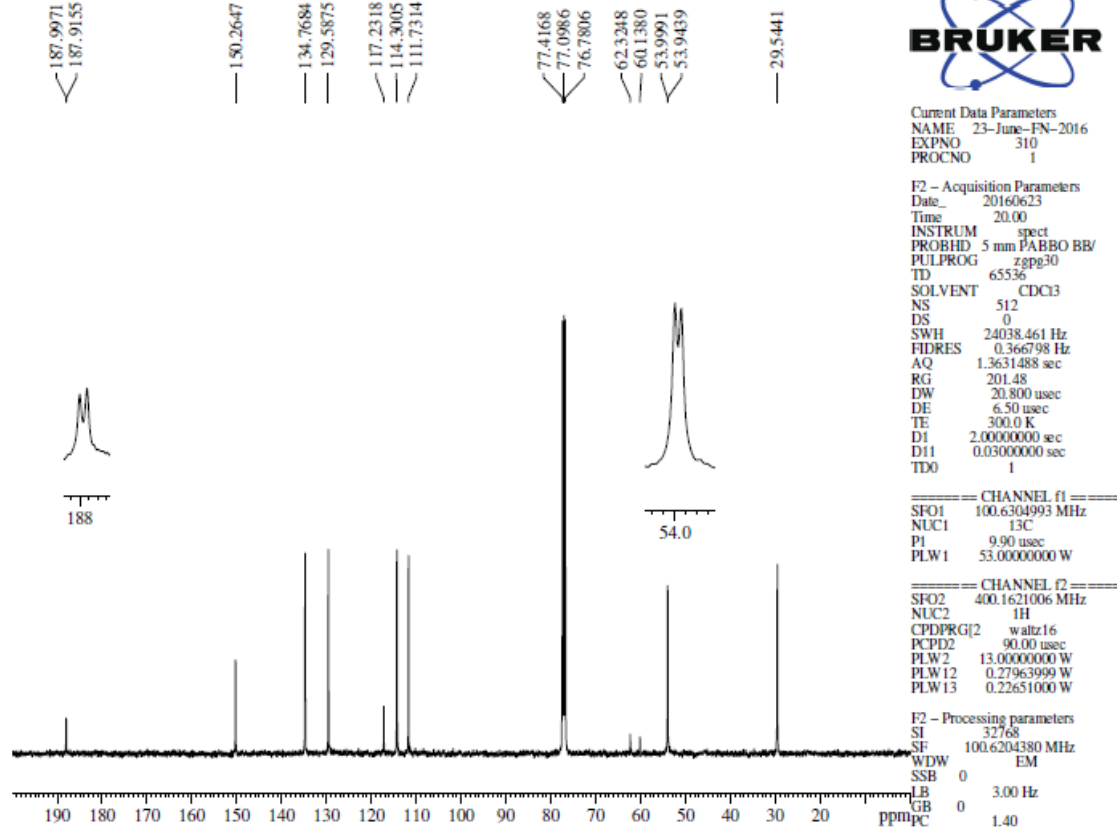Figure 68: <sup>13</sup>C NMR spectrum of 5b

NR-AT-IV-272

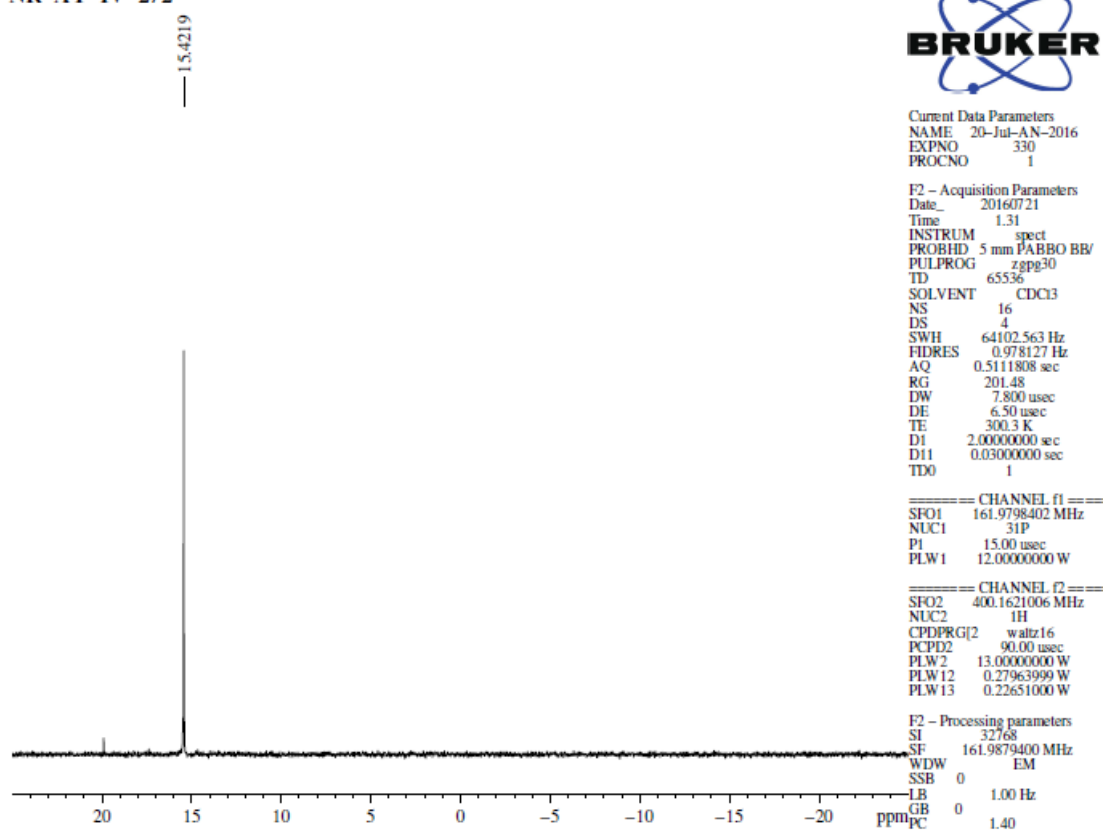

Figure 69:  $^{31}\text{P}$  NMR spectrum of 5b

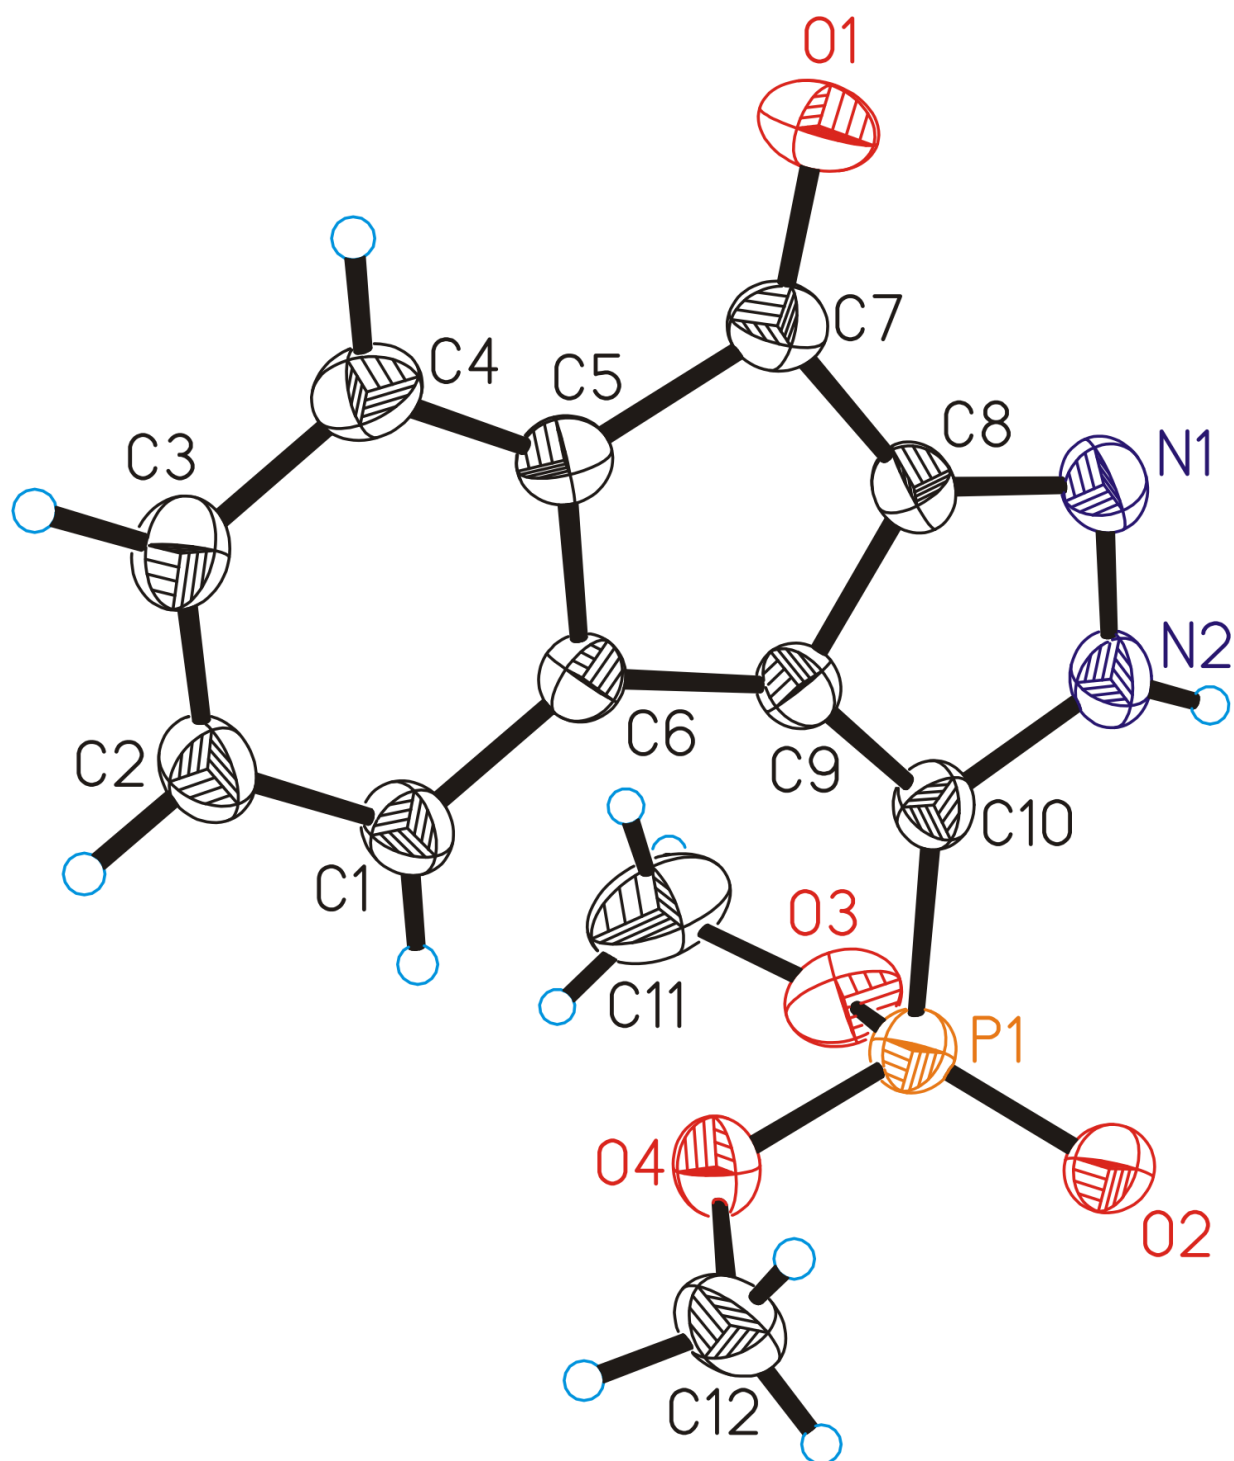

**Figure 70:** Thermal ellipsoid plot with 30% ellipsoid probability for non-H atoms of the crystal structure of compound 3a determined at 293 K
